# Supplementary material for: Mechanistic study of double boron–silicon exchange reactions between dibenzosiloles and boron tribromide
Source: Royal Society of Chemistry journal article supplement (doi:10.1039/d4cp03118k), 2024-01-01
Supplement: d4cp03118k1.pdf [file d4cp03118k1.pdf]

*Supporting information for*

# **Mechanistic study of the double boron--silicon exchange reaction between dibenzosilole and boron tribromide**

*Liam Britt and Yuming Zhao\**

Department of Chemistry, Memorial University of Newfoundland

Core Science Facility, 45 Arctic Avenue, St. John's, NL, Canada A1C 5S7

Email: yuming@mun.ca; Tel: + 1 709 864 8747; Fax: +1 709 864 3702

## **Table of Contents**

|                                                                   |            |
|-------------------------------------------------------------------|------------|
| <b>1. Synthetic procedures</b>                                    | <b>S2</b>  |
| <b>2. Cartesian Coordinates for Optimized Stationary Points</b>   | <b>S4</b>  |
| <b>3. Results of IRC Analysis of Transition States</b>            | <b>S50</b> |
| <b>4. Rotational Potential Energy Surfaces of IM-2 and IM-2**</b> | <b>S56</b> |
| <b>5. Results of NMR Analysis</b>                                 | <b>S57</b> |

## 1. Synthetic Procedures

### 1.1 Synthesis of 2,2'-Dibromo-1,1'-biphenyl

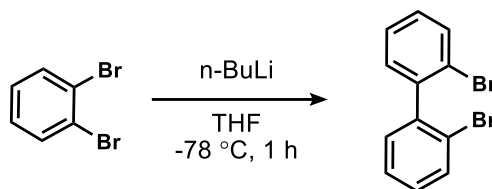

1,2-Dibromobenzene (4.72 g, 20.0 mmol, 1.00 eq.) was dissolved in anhydrous THF (50 mL) in a 100 mL round bottom flask under nitrogen and cooled to -78 °C. *n*-butyllithium (*n*-BuLi) (1.6 M in hexane, 6.25 mL, 10.0 mmol, 2.00 eq.) was added dropwise. Addition of the *n*-BuLi took place over 5 minutes. The resulting mixture was allowed to warm to room temperature. The reaction was then quenched with a small amount of wet THF, and the organic solvent was removed under reduced pressure by rotary evaporation. The residue was dissolved in dichloromethane (50 mL) and washed with water (25 mL), and then washed with saturated aq. NaCl (2 × 25 mL). The organic layer was dried over anhydrous MgSO<sub>4</sub> and filtered. The organic solvent was then removed under reduced pressure by rotary evaporation to give the crude product, which was further purified by silica gel chromatography (10% Et<sub>2</sub>O/hexane) and the product was isolated as a colorless oil (2.21 g, 71% yield). <sup>1</sup>H NMR (300 MHz, CDCl<sub>3</sub>) 7.65 (d, *J* = 8.5 Hz, 2H) 7.38 (m, 2H), 7.25 (m, 4H). <sup>1</sup>H NMR matched with the reported product in the literature.

### 1.2 Synthesis of 4,4-dibutyl-4H-phenanthro[4,5-*bcd*]stannole

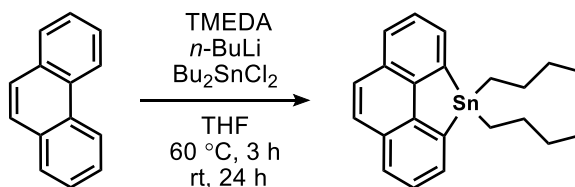

Phenanthrene (1.08 g, 6.00 mmol, 1.00 eq.) and tetramethylethylenediamine (TMEDA) (2.15 mL, 14.4 mmol, 2.40 eq.) were added to a 50 mL round bottom flask under nitrogen. The reaction flask was cooled to 0 °C and *n*-BuLi (2.5 M in hexane, 5.30 mL, 13.2 mmol, 2.20 eq.) was added. The reaction was heated to 60 °C in an oil bath for 3 hours. To the reaction mixture was added 5 mL of dry THF, and the reaction was cooled to -78 °C and dichlorodibutylstannane (Bu<sub>2</sub>SnCl<sub>2</sub>) (1.23 mL, 10.2 mmol, 1.70 eq.) was then added. The reaction mixture was allowed to warm to room temperature and then was stirred for 24 hours. The reaction was quenched with a small amount of wet THF (5 mL), and the organic solvent was removed under reduced pressure by rotary evaporation. The residue was dissolved in diethyl ether (50 mL) and washed with water (25 mL), back extracted with ether (25 mL) and then washed with saturated aq. NaCl (25 mL). The organic layer was then dried over anhydrous MgSO<sub>4</sub> and filtered. The organic solvent was then removed under reduced pressure by rotary evaporation to give the crude product as an orange oil. The crude product which was a single spot by TLC (5% Et<sub>2</sub>O/hexane) was purified by silica gel chromatography using only a short column of silica gel with hexanes as the eluent. The pure product was isolated as a colorless oil which later crystallized upon sitting for weeks (0.981 g, 40% yield). <sup>1</sup>H NMR (500 MHz, CDCl<sub>3</sub>) δ 7.91 (m, 4H), 7.77 (s, 2H), 7.65 (t, *J* = 7.3 Hz, 2H), 1.71 (t, *J* = 7.5 Hz, 6H) 1.47 (m, 4H). 1.41 (m, 4H) 0.92 (t, *J* = 7.4 Hz, 6H). <sup>13</sup>C NMR (125 MHz, CDCl<sub>3</sub>) δ 142.8, 140.8,

134.2, 131.2, 127.7, 126.8, 126.6, 29.1, 27.2, 13.6, 12.3. HRMS (ESI-TOF)  $m/z$  calcd for  $C_{22}H_{26}Sn$  411.1135, found 411.1148  $[M + H]^+$ .

## 2. Cartesian Coordinates for Optimized Stationary Points

### DMDBS

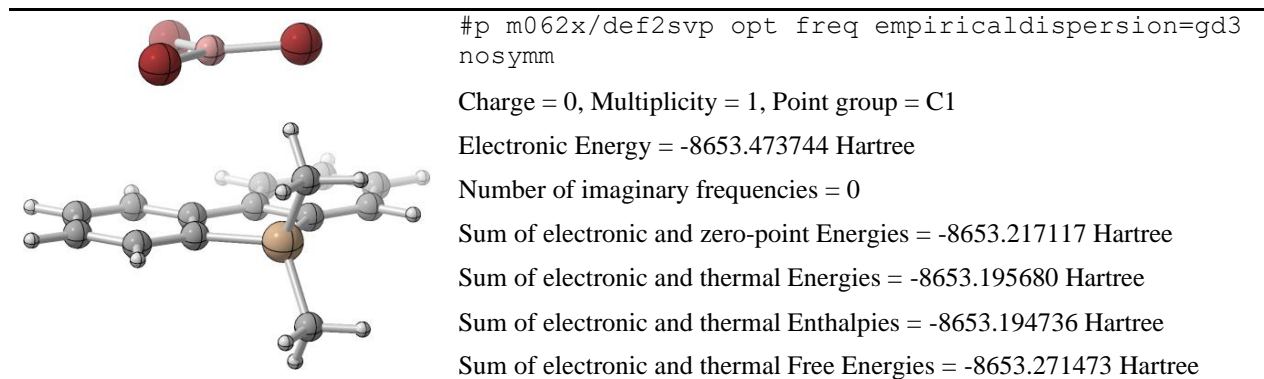

| Cartesian Coordinates |           |           |           | Cartesian Coordinates |           |           |           |
|-----------------------|-----------|-----------|-----------|-----------------------|-----------|-----------|-----------|
| Atoms                 | X         | Y         | Z         | Atoms                 | X         | Y         | Z         |
| C                     | -0.205878 | 2.407639  | -1.767450 | C                     | 0.093072  | 1.021692  | -1.789981 |
| C                     | 0.980729  | 0.563871  | -2.748969 | C                     | 1.561688  | 1.465469  | -3.669636 |
| C                     | 1.255618  | 2.814751  | -3.640729 | C                     | 0.352857  | 3.322478  | -2.678111 |
| C                     | -1.099842 | 2.863680  | -0.729375 | C                     | -1.564606 | 1.886631  | 0.188538  |
| Si                    | -0.898913 | 0.205568  | -0.395422 | C                     | -1.463015 | 4.220987  | -0.645534 |
| C                     | -2.349820 | 4.596221  | 0.389118  | C                     | -2.809655 | 3.654556  | 1.293579  |
| C                     | -2.415610 | 2.300886  | 1.201809  | C                     | -2.295754 | -0.864020 | -1.057361 |
| C                     | 0.132302  | -0.775680 | 0.826287  | C                     | -0.022031 | 4.711713  | -2.562437 |
| C                     | -0.890324 | 5.137296  | -1.602280 | H                     | 1.246789  | -0.494649 | -2.806524 |
| H                     | 2.262961  | 1.089648  | -4.416609 | H                     | 1.712145  | 3.498173  | -4.360078 |
| H                     | -2.655677 | 5.641034  | 0.479600  | H                     | -3.483020 | 3.962431  | 2.095177  |
| H                     | -2.795312 | 1.588993  | 1.939238  | H                     | -2.953738 | -1.194550 | -0.239638 |
| H                     | -1.898041 | -1.759114 | -1.558561 | H                     | -2.899850 | -0.299975 | -1.781583 |
| H                     | 0.474321  | -1.707460 | 0.349800  | H                     | 1.013366  | -0.213106 | 1.162514  |
| H                     | -0.464353 | -1.047864 | 1.710137  | H                     | 0.407368  | 5.426445  | -3.267792 |
| H                     | -1.160657 | 6.193457  | -1.537280 | Br                    | 0.582148  | 1.786131  | 3.470985  |
| B                     | 1.117549  | 3.041626  | 2.138817  | Br                    | 0.599824  | 4.859474  | 2.300086  |
| Br                    | 2.232130  | 2.494337  | 0.699885  |                       |           |           |           |

IM-2

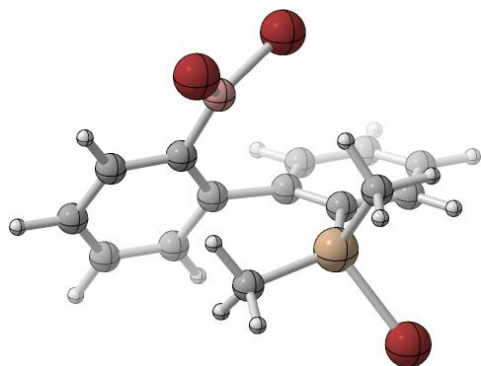

```
#p m062x/def2svp opt freq
empiricaldispersion=gd3 nosymm
Charge = 0, Multiplicity = 1, Point group = C1
Electronic Energy = -8577.341731 Hartree
Number of imaginary frequencies = 0
Sum of electronic and zero-point Energies = -8577.096971 Hartree
Sum of electronic and thermal Energies = -8577.076579 Hartree
Sum of electronic and thermal Enthalpies = -8577.075635 Hartree
Sum of electronic and thermal Free Energies = -8577.149142
Hartree
```

| Cartesian Coordinates |           |           |           | Cartesian Coordinates |           |           |           |
|-----------------------|-----------|-----------|-----------|-----------------------|-----------|-----------|-----------|
| Atoms                 | X         | Y         | Z         | Atoms                 | X         | Y         | Z         |
| C                     | 2.939758  | 1.781176  | 0.362456  | C                     | 2.974747  | 0.889404  | -0.736243 |
| C                     | 3.875467  | -0.193503 | -0.685740 | C                     | 4.741466  | -0.374394 | 0.386727  |
| C                     | 4.712413  | 0.523661  | 1.452522  | C                     | 3.815238  | 1.588837  | 1.437108  |
| C                     | 1.983277  | 2.924121  | 0.430475  | C                     | 2.517936  | 4.217803  | 0.355864  |
| C                     | 1.688916  | 5.333376  | 0.339824  | C                     | 0.306767  | 5.165570  | 0.416912  |
| C                     | -0.224564 | 3.885582  | 0.535119  | C                     | 0.591487  | 2.740374  | 0.548360  |
| Si                    | -0.330232 | 1.100931  | 0.768851  | C                     | -1.513796 | 0.843028  | -0.657185 |
| C                     | 0.671271  | -0.433054 | 1.140094  | Br                    | -1.638737 | 1.423005  | 2.595097  |
| B                     | 2.115394  | 1.048137  | -2.026187 | Br                    | 1.704076  | 2.722229  | -2.843994 |
| Br                    | 1.475556  | -0.532051 | -2.925564 | H                     | 3.901566  | -0.903531 | -1.514139 |
| H                     | 5.435171  | -1.215879 | 0.392077  | H                     | 5.381426  | 0.388959  | 2.303976  |
| H                     | 3.768840  | 2.280065  | 2.280868  | H                     | 3.600214  | 4.336956  | 0.272857  |
| H                     | 2.120095  | 6.332492  | 0.260709  | H                     | -0.355742 | 6.032119  | 0.402386  |
| H                     | -1.307160 | 3.775749  | 0.644129  | H                     | -2.174818 | 1.713886  | -0.770405 |
| H                     | -2.137324 | -0.044434 | -0.476364 | H                     | -0.966666 | 0.699381  | -1.601507 |
| H                     | 1.483970  | -0.230339 | 1.852174  | H                     | 1.104064  | -0.859972 | 0.224290  |
| H                     | -0.007356 | -1.175315 | 1.585086  |                       |           |           |           |

### IM-3

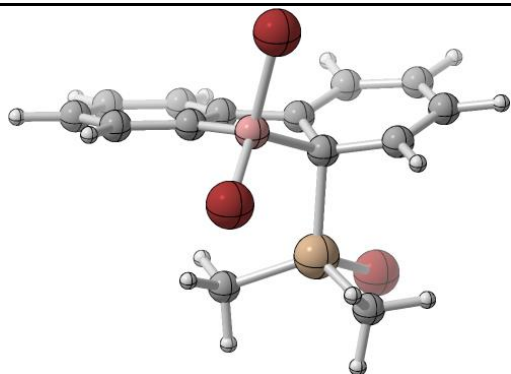

```
#p m062x/def2svp opt freq
empiricaldispersion=gd3 nosymm
```

Charge = 0, Multiplicity = 1, Point group = C1

Electronic Energy = -8577.328312 Hartree

Number of imaginary frequencies = 0

Sum of electronic and zero-point Energies = -8577.083491 Hartree

Sum of electronic and thermal Energies = -8577.063553 Hartree

Sum of electronic and thermal Enthalpies = -8577.062609 Hartree

Sum of electronic and thermal Free Energies = -8577.133018 Hartree

| Cartesian Coordinates |           |           |           | Cartesian Coordinates |           |           |           |
|-----------------------|-----------|-----------|-----------|-----------------------|-----------|-----------|-----------|
| Atoms                 | X         | Y         | Z         | Atoms                 | X         | Y         | Z         |
| C                     | 3.140523  | 1.765642  | 0.543945  | C                     | 3.074035  | 0.974105  | -0.620970 |
| C                     | 3.978197  | -0.077298 | -0.770426 | C                     | 4.932720  | -0.308682 | 0.219805  |
| C                     | 4.996934  | 0.495977  | 1.367480  | C                     | 4.102159  | 1.546061  | 1.538216  |
| C                     | 2.087721  | 2.775355  | 0.524822  | C                     | 2.089870  | 4.001228  | 1.194677  |
| C                     | 1.112998  | 4.936586  | 0.882924  | C                     | 0.138680  | 4.700989  | -0.112036 |
| C                     | 0.113821  | 3.488004  | -0.758497 | C                     | 1.035849  | 2.440740  | -0.411610 |
| Si                    | -0.140008 | 1.122815  | 0.513321  | C                     | -1.761131 | 0.940844  | -0.388948 |
| C                     | 0.740041  | -0.447911 | 0.982607  | Br                    | -0.694743 | 2.099837  | 2.482938  |
| B                     | 1.912627  | 1.506060  | -1.579914 | Br                    | 2.629507  | 2.873913  | -2.899245 |
| Br                    | 0.910444  | 0.058559  | -2.578270 | H                     | 3.934488  | -0.710187 | -1.659652 |
| H                     | 5.645378  | -1.127270 | 0.103489  | H                     | 5.748505  | 0.290622  | 2.130793  |
| H                     | 4.132958  | 2.162077  | 2.439319  | H                     | 2.880071  | 4.242842  | 1.906433  |
| H                     | 1.120581  | 5.901642  | 1.394138  | H                     | -0.578714 | 5.481986  | -0.363076 |
| H                     | -0.633299 | 3.288595  | -1.531592 | H                     | -2.356506 | 1.858276  | -0.287514 |
| H                     | -2.317794 | 0.119692  | 0.087277  | H                     | -1.612910 | 0.700174  | -1.449012 |
| H                     | 1.602323  | -0.248507 | 1.632781  | H                     | 1.068400  | -1.003258 | 0.095070  |
| H                     | 0.010254  | -1.051049 | 1.544787  |                       |           |           |           |

**Br-DBB**

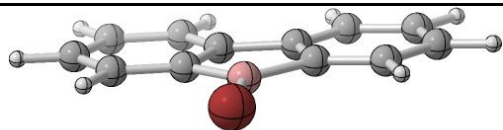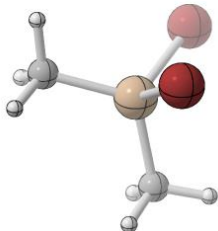

#p m062x/def2svp opt freq  
empiricaldispersion=gd3 nosymm

Charge = 0, Multiplicity = 1, Point group = C1

Electronic Energy = -8577.357347 Hartree

Number of imaginary frequencies = 0

Sum of electronic and zero-point Energies = -8577.113140 Hartree

Sum of electronic and thermal Energies = -8577.092180 Hartree

Sum of electronic and thermal Enthalpies = -8577.091236 Hartree

Sum of electronic and thermal Free Energies = -8577.168064 Hartree

| Cartesian Coordinates |           |           |           | Cartesian Coordinates |           |           |           |
|-----------------------|-----------|-----------|-----------|-----------------------|-----------|-----------|-----------|
| Atoms                 | X         | Y         | Z         | Atoms                 | X         | Y         | Z         |
| C                     | 2.880882  | 2.299030  | 0.885851  | C                     | 3.170348  | 1.598732  | -0.311024 |
| C                     | 3.856334  | 0.389863  | -0.263570 | C                     | 4.253982  | -0.128442 | 0.976017  |
| C                     | 3.948915  | 0.559108  | 2.150911  | C                     | 3.254192  | 1.776716  | 2.118007  |
| C                     | 2.187819  | 3.585688  | 0.588001  | C                     | 1.734445  | 4.551927  | 1.474860  |
| C                     | 1.101502  | 5.691941  | 0.961133  | C                     | 0.927657  | 5.861285  | -0.411896 |
| C                     | 1.386305  | 4.884336  | -1.303651 | C                     | 2.016260  | 3.748897  | -0.807137 |
| Si                    | -0.768860 | 0.412915  | 1.051034  | C                     | -2.498119 | -0.257215 | 1.200095  |
| C                     | 0.583902  | -0.844747 | 1.224328  | Br                    | -0.508229 | 1.975405  | 2.636068  |
| B                     | 2.604092  | 2.470553  | -1.477988 | Br                    | 2.647655  | 2.061661  | -3.341147 |
| Br                    | -0.587887 | 1.385467  | -0.958724 | H                     | 4.084997  | -0.146327 | -1.187839 |
| H                     | 4.798488  | -1.072372 | 1.026534  | H                     | 4.255369  | 0.143427  | 3.112471  |
| H                     | 3.020354  | 2.300855  | 3.046548  | H                     | 1.855427  | 4.430385  | 2.553041  |
| H                     | 0.737376  | 6.457855  | 1.648057  | H                     | 0.430793  | 6.756537  | -0.788195 |
| H                     | 1.248553  | 5.007954  | -2.380583 | H                     | -3.231563 | 0.552106  | 1.084412  |
| H                     | -2.637289 | -0.722148 | 2.186949  | H                     | -2.676746 | -1.010282 | 0.418774  |
| H                     | 1.564021  | -0.362427 | 1.105504  | H                     | 0.474863  | -1.619557 | 0.451214  |
| H                     | 0.536990  | -1.314218 | 2.217874  |                       |           |           |           |

## TS-2

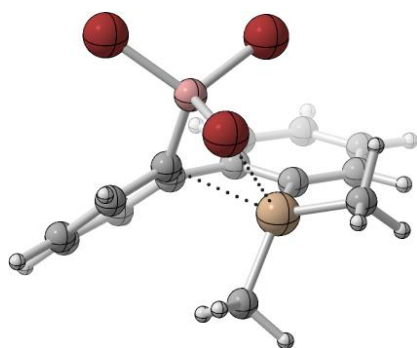

#p m062x/def2svp opt=(calcfc,ts,noeigen) freq  
empiricaldispersion=gd3 nosymm

Charge = 0, Multiplicity = 1, Point group = C1

Electronic Energy = -8577.282509 Hartree

Number of imaginary frequencies = 1,  $\nu_i = -146.36 \text{ cm}^{-1}$

Sum of electronic and zero-point Energies = -8577.038906 Hartree

Sum of electronic and thermal Energies = -8577.019489 Hartree

Sum of electronic and thermal Enthalpies = -8577.018545 Hartree

Sum of electronic and thermal Free Energies = -8577.087254 Hartree

| Cartesian Coordinates |           |           |           | Cartesian Coordinates |           |           |           |
|-----------------------|-----------|-----------|-----------|-----------------------|-----------|-----------|-----------|
| Atoms                 | X         | Y         | Z         | Atoms                 | X         | Y         | Z         |
| C                     | 0.556064  | -1.419519 | -0.337093 | C                     | 0.282178  | -2.294688 | 0.726445  |
| C                     | 0.893842  | -3.554496 | 0.752600  | C                     | 1.728641  | -3.943590 | -0.290602 |
| C                     | 1.977094  | -3.072005 | -1.356941 | C                     | 1.389605  | -1.812328 | -1.389713 |
| C                     | -0.145516 | -0.130544 | -0.253797 | C                     | -0.342748 | 0.461202  | 1.029536  |
| Si                    | -0.816234 | -1.612525 | 2.078476  | C                     | -0.822184 | 0.352533  | -1.383487 |
| C                     | -1.772632 | 1.354567  | -1.258610 | C                     | -2.078865 | 1.875750  | 0.006815  |
| C                     | -1.376482 | 1.440013  | 1.113414  | C                     | -2.642517 | -1.450815 | 1.734685  |
| C                     | -0.491254 | -2.618342 | 3.617960  | Br                    | -0.224191 | 0.531082  | 4.006134  |
| B                     | 0.828947  | 0.741291  | 2.190757  | Br                    | 1.452296  | 2.641994  | 2.021472  |
| Br                    | 2.424114  | -0.468389 | 2.256227  | H                     | 0.722418  | -4.238375 | 1.586347  |
| H                     | 2.195717  | -4.929274 | -0.275604 | H                     | 2.648687  | -3.377457 | -2.160599 |
| H                     | 1.609969  | -1.118592 | -2.203099 | H                     | -0.650615 | -0.126711 | -2.348917 |
| H                     | -2.311614 | 1.705158  | -2.140535 | H                     | -2.847719 | 2.641400  | 0.114277  |
| H                     | -1.573290 | 1.905594  | 2.080829  | H                     | -3.089600 | -0.742630 | 2.446851  |
| H                     | -3.115825 | -2.434823 | 1.877178  | H                     | -2.827732 | -1.095543 | 0.712231  |
| H                     | -0.695853 | -3.672907 | 3.363024  | H                     | 0.556719  | -2.521059 | 3.931538  |
| H                     | -1.146429 | -2.315924 | 4.443713  |                       |           |           |           |



TS-3

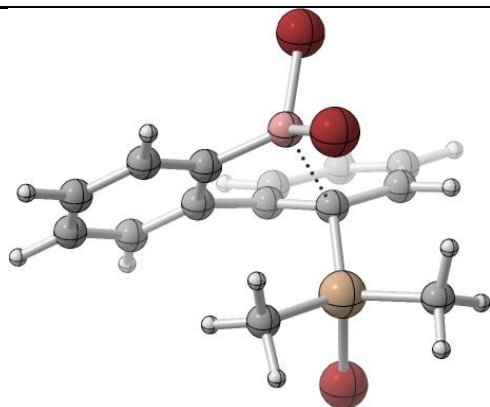

#p m062x/def2svp opt=(calcfc,ts,noeigen) freq  
empiricaldispersion=gd3 nosymm

Charge = 0, Multiplicity = 1, Point group = C1

Electronic Energy = -8577.324807 Hartree

Number of imaginary frequencies = 1,  $\nu_i = -169.60$

Sum of electronic and zero-point Energies = -8577.080775 Hartree

Sum of electronic and thermal Energies = -8577.061225 Hartree

Sum of electronic and thermal Enthalpies = -8577.060281 Hartree

Sum of electronic and thermal Free Energies = -8577.130018  
Hartree

| Cartesian Coordinates |           |           |           | Cartesian Coordinates |           |           |           |
|-----------------------|-----------|-----------|-----------|-----------------------|-----------|-----------|-----------|
| Atoms                 | X         | Y         | Z         | Atoms                 | X         | Y         | Z         |
| C                     | 1.793665  | -0.191158 | 0.046343  | C                     | 1.822453  | -0.880829 | -1.179538 |
| C                     | 2.708724  | -1.948216 | -1.337613 | C                     | 3.563727  | -2.292021 | -0.291001 |
| C                     | 3.539946  | -1.582801 | 0.916558  | C                     | 2.657578  | -0.519837 | 1.093750  |
| C                     | 0.761770  | 0.853465  | 0.020789  | C                     | 0.958156  | 2.156859  | 0.476378  |
| C                     | 0.067475  | 3.152501  | 0.091084  | C                     | -1.028918 | 2.868892  | -0.740454 |
| C                     | -1.269116 | 1.565690  | -1.129175 | C                     | -0.395327 | 0.507725  | -0.751904 |
| Si                    | -1.371594 | -1.050920 | -0.181008 | C                     | -2.977477 | -1.207766 | -1.121899 |
| C                     | -0.445489 | -2.653114 | 0.037341  | Br                    | -1.974567 | -0.453725 | 1.928954  |
| B                     | 0.819497  | -0.268830 | -2.240905 | Br                    | 1.458789  | 1.341902  | -3.197993 |
| Br                    | -0.170626 | -1.516803 | -3.418640 | H                     | 2.732235  | -2.504411 | -2.277414 |
| H                     | 4.262797  | -3.121096 | -0.412179 | H                     | 4.210187  | -1.872582 | 1.727043  |
| H                     | 2.612928  | 0.018082  | 2.042808  | H                     | 1.850950  | 2.403239  | 1.053228  |
| H                     | 0.244477  | 4.181456  | 0.410142  | H                     | -1.694693 | 3.672311  | -1.056074 |
| H                     | -2.152396 | 1.338413  | -1.731380 | H                     | -3.640834 | -0.360017 | -0.903411 |
| H                     | -3.483170 | -2.124665 | -0.784869 | H                     | -2.809750 | -1.277764 | -2.205009 |
| H                     | 0.423210  | -2.528494 | 0.698404  | H                     | -0.112264 | -3.062770 | -0.925079 |
| H                     | -1.144663 | -3.359227 | 0.511055  |                       |           |           |           |

### TS-4

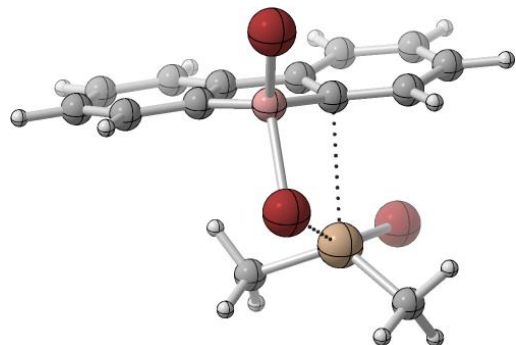

```
#p m062x/def2svp opt=(calcfc,ts,noeigen)
freq empiricaldispersion=gd3 nosymm
```

Charge = 0, Multiplicity = 1, Point group = C1

Electronic Energy = -8577.301270 Hartree

Number of imaginary frequencies = 1,  $\nu_i = -132.06 \text{ cm}^{-1}$

Sum of electronic and zero-point Energies = -8577.057190 Hartree

Sum of electronic and thermal Energies = -8577.037499 Hartree

Sum of electronic and thermal Enthalpies = -8577.036554 Hartree

Sum of electronic and thermal Free Energies = -8577.107026 Hartree

| Cartesian Coordinates |           |           |           | Cartesian Coordinates |           |           |           |
|-----------------------|-----------|-----------|-----------|-----------------------|-----------|-----------|-----------|
| Atoms                 | X         | Y         | Z         | Atoms                 | X         | Y         | Z         |
| C                     | 3.205712  | 1.632375  | 0.472602  | C                     | 3.252475  | 0.945894  | -0.761461 |
| C                     | 4.206139  | -0.051625 | -0.947539 | C                     | 5.091910  | -0.367196 | 0.086515  |
| C                     | 5.035386  | 0.317738  | 1.304325  | C                     | 4.093099  | 1.327026  | 1.505718  |
| C                     | 2.109128  | 2.624970  | 0.480854  | C                     | 1.826677  | 3.610851  | 1.421919  |
| C                     | 0.760487  | 4.482857  | 1.185077  | C                     | -0.023483 | 4.383175  | 0.029685  |
| C                     | 0.263170  | 3.405400  | -0.919200 | C                     | 1.326633  | 2.512634  | -0.701798 |
| Si                    | -0.367936 | 0.463383  | 0.119544  | C                     | -2.045173 | 0.219203  | -0.661501 |
| C                     | 0.698662  | -0.886870 | 0.825881  | Br                    | -0.933433 | 1.681515  | 1.940459  |
| B                     | 2.121401  | 1.547643  | -1.711176 | Br                    | 2.743258  | 2.395386  | -3.402277 |
| Br                    | 0.668169  | 0.046314  | -2.242198 | H                     | 4.260391  | -0.585797 | -1.899374 |
| H                     | 5.836732  | -1.152215 | -0.055000 | H                     | 5.733289  | 0.060908  | 2.102758  |
| H                     | 4.049476  | 1.857343  | 2.459303  | H                     | 2.430202  | 3.716655  | 2.325145  |
| H                     | 0.533755  | 5.259481  | 1.917992  | H                     | -0.847188 | 5.080569  | -0.127053 |
| H                     | -0.306687 | 3.347581  | -1.851440 | H                     | -2.296612 | 1.109457  | -1.256180 |
| H                     | -2.801084 | 0.098164  | 0.125515  | H                     | -2.029204 | -0.650252 | -1.332038 |
| H                     | 1.745201  | -0.550076 | 0.884372  | H                     | 0.656930  | -1.763595 | 0.165887  |
| H                     | 0.345569  | -1.130256 | 1.836815  |                       |           |           |           |

**DMDBS[BBr<sub>3</sub>]**

#p m062x/def2svp opt freq  
empiricaldispersion=gd3 nosymm

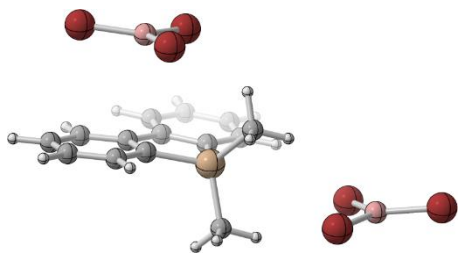

Charge = 0, Multiplicity = 1, Point group = C1

Electronic Energy = -16323.917128 Hartree

Number of imaginary frequencies = 0

Sum of electronic and zero-point Energies = -16323.667058 Hartree

Sum of electronic and thermal Energies = -16323.638958 Hartree

Sum of electronic and thermal Enthalpies = -16323.638013 Hartree

Sum of electronic and thermal Free Energies = -16323.736683 Hartree

| Cartesian Coordinates |           |           |           | Cartesian Coordinates |           |           |           |
|-----------------------|-----------|-----------|-----------|-----------------------|-----------|-----------|-----------|
| Atoms                 | X         | Y         | Z         | Atoms                 | X         | Y         | Z         |
| C                     | -0.171049 | 2.472281  | -1.812733 | C                     | 0.107871  | 1.086410  | -1.807560 |
| C                     | 1.004755  | 0.566755  | -2.740726 | C                     | 1.619655  | 1.403059  | -3.675362 |
| C                     | 1.333997  | 2.768712  | -3.678473 | C                     | 0.441868  | 3.306198  | -2.751216 |
| C                     | -1.095655 | 2.937157  | -0.741256 | C                     | -1.488701 | 1.944029  | 0.186690  |
| Si                    | -0.854013 | 0.264423  | -0.408718 | C                     | -1.580079 | 4.242544  | -0.615856 |
| C                     | -2.444096 | 4.564563  | 0.429642  | C                     | -2.819880 | 3.595965  | 1.361874  |
| C                     | -2.344506 | 2.289077  | 1.235152  | C                     | -2.311150 | -0.751919 | -1.025966 |
| C                     | 0.206574  | -0.743945 | 0.766118  | H                     | 1.240804  | -0.500511 | -2.740449 |
| H                     | 2.324744  | 0.991368  | -4.399200 | H                     | 1.816580  | 3.423687  | -4.405772 |
| H                     | 0.241491  | 4.378991  | -2.755900 | H                     | -1.292134 | 5.012437  | -1.333757 |
| H                     | -2.821400 | 5.584372  | 0.523451  | H                     | -3.486722 | 3.859291  | 2.184352  |
| H                     | -2.653033 | 1.534101  | 1.963531  | H                     | -2.939515 | -1.076852 | -0.182284 |
| H                     | -1.973882 | -1.649440 | -1.564499 | H                     | -2.928374 | -0.145537 | -1.704072 |
| H                     | 0.567904  | -1.641770 | 0.240710  | H                     | 1.076915  | -0.174918 | 1.118886  |
| H                     | -0.374403 | -1.075640 | 1.640212  | Br                    | 0.600637  | 1.723399  | 3.472734  |
| B                     | 1.106289  | 3.014919  | 2.162848  | Br                    | 0.537455  | 4.814413  | 2.353400  |
| Br                    | 2.247859  | 2.522523  | 0.724614  | Br                    | 0.399230  | -3.372180 | -2.324773 |
| B                     | -0.030611 | -4.629211 | -0.959596 | Br                    | 0.858689  | -6.304236 | -0.906502 |
| Br                    | -1.348093 | -4.201678 | 0.339573  |                       |           |           |           |

**IM-1[BBr<sub>3</sub>]**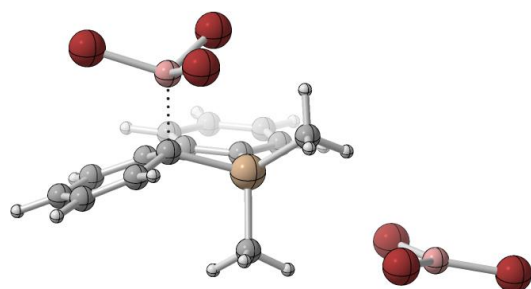

```
#p m062x/def2svp opt freq  
empiricaldispersion=gd3 nosymm
```

Charge = 0, Multiplicity = 1, Point group = C1

Electronic Energy = -16323.897794 Hartree

Number of imaginary frequencies = 0

Sum of electronic and zero-point Energies = -16323.647699 Hartree

Sum of electronic and thermal Energies = -16323.620155 Hartree

Sum of electronic and thermal Enthalpies = -16323.619211 Hartree

Sum of electronic and thermal Free Energies = -16323.713981 Hartree

| Cartesian Coordinates |           |           |           | Cartesian Coordinates |           |           |           |
|-----------------------|-----------|-----------|-----------|-----------------------|-----------|-----------|-----------|
| Atoms                 | X         | Y         | Z         | Atoms                 | X         | Y         | Z         |
| C                     | 0.000531  | 2.487212  | -1.718019 | C                     | 0.348655  | 1.123817  | -1.615250 |
| C                     | 1.249432  | 0.583156  | -2.534193 | C                     | 1.774859  | 1.381932  | -3.549420 |
| C                     | 1.411727  | 2.729017  | -3.652261 | C                     | 0.523137  | 3.288046  | -2.740718 |
| C                     | -0.919243 | 2.956644  | -0.671592 | C                     | -0.951402 | 2.170358  | 0.541586  |
| Si                    | -0.492972 | 0.376164  | -0.107282 | C                     | -1.799990 | 4.023633  | -0.851918 |
| C                     | -2.810540 | 4.243545  | 0.077347  | C                     | -2.988018 | 3.391645  | 1.180326  |
| C                     | -2.081513 | 2.377132  | 1.399464  | C                     | -2.171720 | -0.359479 | -0.525106 |
| C                     | 0.547238  | -0.816631 | 0.875307  | H                     | 1.559574  | -0.461495 | -2.456558 |
| H                     | 2.480589  | 0.957200  | -4.265148 | H                     | 1.840451  | 3.347818  | -4.441612 |
| H                     | 0.271039  | 4.348284  | -2.800374 | H                     | -1.739541 | 4.641389  | -1.748734 |
| H                     | -3.503856 | 5.073290  | -0.075354 | H                     | -3.814395 | 3.555500  | 1.871660  |
| H                     | -2.171634 | 1.760071  | 2.295931  | H                     | -2.715090 | -0.608630 | 0.399754  |
| H                     | -2.067721 | -1.279214 | -1.117926 | H                     | -2.771376 | 0.363533  | -1.097110 |
| H                     | 0.770808  | -1.670654 | 0.214731  | H                     | 1.488186  | -0.361180 | 1.207058  |
| H                     | 0.003478  | -1.191612 | 1.753393  | Br                    | 0.364404  | 1.573197  | 3.319890  |
| B                     | 0.485075  | 2.708420  | 1.667087  | Br                    | 0.210046  | 4.640578  | 2.079243  |
| Br                    | 2.222025  | 2.433309  | 0.731495  | Br                    | -0.039764 | -2.969839 | -2.519234 |
| B                     | -0.452663 | -4.400944 | -1.328198 | Br                    | 0.080825  | -6.168522 | -1.756233 |
| Br                    | -1.397727 | -4.044512 | 0.280065  |                       |           |           |           |

**IM-2[BBr<sub>3</sub>]**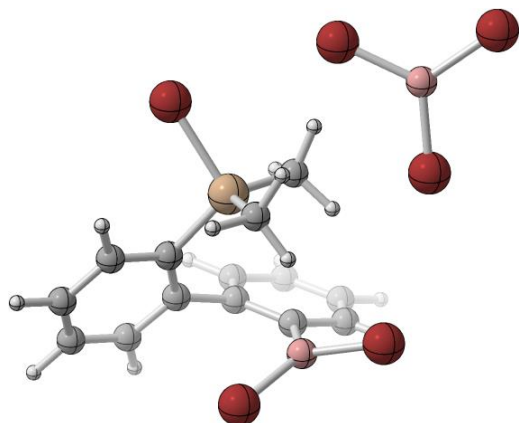

```
#p m062x/def2svp opt freq
empiricaldispersion=gd3 nosymm
```

Charge = 0, Multiplicity = 1, Point group = C1

Electronic Energy = -16323.939257 Hartree

Number of imaginary frequencies = 0

Sum of electronic and zero-point Energies = -16323.687812 Hartree

Sum of electronic and thermal Energies = -16323.660175 Hartree

Sum of electronic and thermal Enthalpies = -16323.659231 Hartree

Sum of electronic and thermal Free Energies = -16323.755228 Hartree

| Cartesian Coordinates |           |           |           | Cartesian Coordinates |           |           |           |
|-----------------------|-----------|-----------|-----------|-----------------------|-----------|-----------|-----------|
| Atoms                 | X         | Y         | Z         | Atoms                 | X         | Y         | Z         |
| C                     | 2.924616  | 1.768605  | 0.347217  | C                     | 2.958933  | 0.878241  | -0.753727 |
| C                     | 3.870270  | -0.196958 | -0.710101 | C                     | 4.743440  | -0.374478 | 0.356680  |
| C                     | 4.713103  | 0.520542  | 1.424827  | C                     | 3.808521  | 1.579180  | 1.415788  |
| C                     | 1.969161  | 2.912549  | 0.429886  | C                     | 2.509286  | 4.203809  | 0.349813  |
| C                     | 1.686844  | 5.324366  | 0.354557  | C                     | 0.305851  | 5.163573  | 0.458540  |
| C                     | -0.230107 | 3.885721  | 0.580678  | C                     | 0.578719  | 2.735534  | 0.573370  |
| Si                    | -0.344814 | 1.091348  | 0.764047  | C                     | -1.466422 | 0.848501  | -0.714095 |
| C                     | 0.681979  | -0.402205 | 1.220902  | Br                    | -1.740265 | 1.416382  | 2.528859  |
| B                     | 2.088905  | 1.026119  | -2.037247 | Br                    | 1.599803  | 2.692803  | -2.824759 |
| Br                    | 1.511947  | -0.563922 | -2.968166 | H                     | 3.898702  | -0.904518 | -1.540256 |
| H                     | 5.443700  | -1.210504 | 0.355541  | H                     | 5.387605  | 0.389267  | 2.272492  |
| H                     | 3.763024  | 2.269192  | 2.260589  | H                     | 3.590519  | 4.317427  | 0.247318  |
| H                     | 2.122324  | 6.321276  | 0.271243  | H                     | -0.352283 | 6.033596  | 0.460886  |
| H                     | -1.311127 | 3.780901  | 0.707601  | H                     | -2.029862 | 1.774116  | -0.902135 |
| H                     | -2.180314 | 0.034322  | -0.527013 | H                     | -0.889672 | 0.604579  | -1.619544 |
| H                     | 1.434342  | -0.140254 | 1.979104  | H                     | 1.194736  | -0.828804 | 0.347522  |
| H                     | 0.011256  | -1.165959 | 1.640223  | Br                    | -0.876944 | -2.796328 | -1.119127 |
| B                     | -2.163606 | -3.377609 | 0.157008  | Br                    | -2.779405 | -5.174333 | 0.138507  |
| Br                    | -2.823746 | -2.149779 | 1.449233  |                       |           |           |           |

**IM-3[BBr<sub>3</sub>]**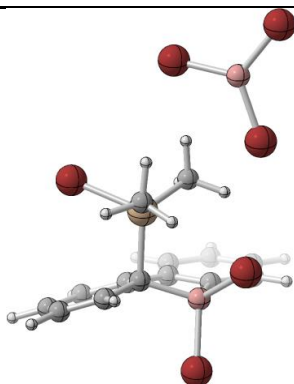

#p m062x/def2svp opt freq empiricaldispersion=gd3  
nosymm

Charge = 0, Multiplicity = 1, Point group = C1

Electronic Energy = -16323.925411 Hartree

Number of imaginary frequencies = 0

Sum of electronic and zero-point Energies = -16323.673680 Hartree

Sum of electronic and thermal Energies = -16323.646600 Hartree

Sum of electronic and thermal Enthalpies = -16323.645656 Hartree

Sum of electronic and thermal Free Energies = -16323.738695 Hartree

| Cartesian Coordinates |           |           |           | Cartesian Coordinates |           |           |           |
|-----------------------|-----------|-----------|-----------|-----------------------|-----------|-----------|-----------|
| Atoms                 | X         | Y         | Z         | Atoms                 | X         | Y         | Z         |
| C                     | 3.141372  | 1.756490  | 0.539455  | C                     | 3.076491  | 0.965649  | -0.625872 |
| C                     | 3.987294  | -0.079525 | -0.779160 | C                     | 4.945841  | -0.306315 | 0.208169  |
| C                     | 5.008120  | 0.497435  | 1.356559  | C                     | 4.107254  | 1.541621  | 1.530704  |
| C                     | 2.083811  | 2.761554  | 0.524513  | C                     | 2.075842  | 3.980043  | 1.207881  |
| C                     | 1.096805  | 4.914438  | 0.899973  | C                     | 0.132229  | 4.685874  | -0.105837 |
| C                     | 0.118339  | 3.480077  | -0.766314 | C                     | 1.038663  | 2.431449  | -0.420566 |
| Si                    | -0.153497 | 1.115852  | 0.509904  | C                     | -1.772374 | 0.972267  | -0.402984 |
| C                     | 0.757852  | -0.429233 | 1.004145  | Br                    | -0.725894 | 2.094690  | 2.474116  |
| B                     | 1.907897  | 1.491303  | -1.579651 | Br                    | 2.615718  | 2.842391  | -2.920271 |
| Br                    | 0.906024  | 0.027336  | -2.566727 | H                     | 3.945313  | -0.711693 | -1.669023 |
| H                     | 5.663236  | -1.120334 | 0.088935  | H                     | 5.763210  | 0.296224  | 2.117501  |
| H                     | 4.137469  | 2.157365  | 2.432026  | H                     | 2.859915  | 4.217396  | 1.927791  |
| H                     | 1.095710  | 5.873414  | 1.422513  | H                     | -0.585779 | 5.466880  | -0.355135 |
| H                     | -0.619128 | 3.287140  | -1.550039 | H                     | -2.319809 | 1.922056  | -0.329101 |
| H                     | -2.369269 | 0.195057  | 0.097416  | H                     | -1.630438 | 0.694468  | -1.455018 |
| H                     | 1.579301  | -0.190670 | 1.693444  | H                     | 1.149848  | -0.969965 | 0.133838  |
| H                     | 0.026624  | -1.062296 | 1.530855  | Br                    | -1.312925 | -2.568354 | -1.050504 |
| B                     | -2.426364 | -3.244460 | 0.328718  | Br                    | -3.229399 | -4.956876 | 0.174302  |
| Br                    | -2.740424 | -2.191511 | 1.890050  |                       |           |           |           |

### Br-DBB[BBr<sub>3</sub>]

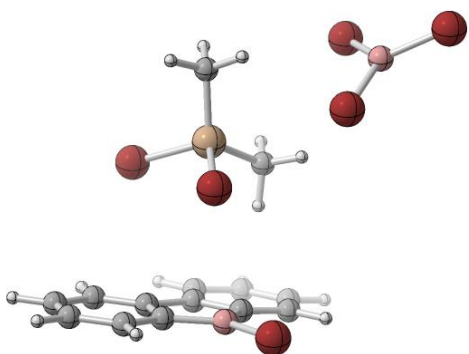

#p m062x/def2svp opt freq  
empiricaldispersion=gd3 nosymm

Charge = 0, Multiplicity = 1, Point group = C1

Electronic Energy = -16323.953600 Hartree

Number of imaginary frequencies = 0

Sum of electronic and zero-point Energies = -16323.702684 Hartree

Sum of electronic and thermal Energies = -16323.674461 Hartree

Sum of electronic and thermal Enthalpies = -16323.673517 Hartree

Sum of electronic and thermal Free Energies = -16323.773157  
Hartree

| Cartesian Coordinates |           |           |           | Cartesian Coordinates |           |           |           |
|-----------------------|-----------|-----------|-----------|-----------------------|-----------|-----------|-----------|
| Atoms                 | X         | Y         | Z         | Atoms                 | X         | Y         | Z         |
| C                     | 2.889304  | 2.300241  | 0.888667  | C                     | 3.161961  | 1.592754  | -0.307892 |
| C                     | 3.845237  | 0.382340  | -0.262375 | C                     | 4.258092  | -0.129695 | 0.974796  |
| C                     | 3.971611  | 0.566099  | 2.149464  | C                     | 3.279118  | 1.785059  | 2.118680  |
| C                     | 2.192729  | 3.585395  | 0.592891  | C                     | 1.749542  | 4.555564  | 1.480701  |
| C                     | 1.110055  | 5.692840  | 0.969379  | C                     | 0.919846  | 5.855792  | -0.402340 |
| C                     | 1.368229  | 4.874982  | -1.294938 | C                     | 2.004428  | 3.741922  | -0.800755 |
| Si                    | -0.777677 | 0.388915  | 1.026077  | C                     | -2.517317 | -0.253698 | 1.175191  |
| C                     | 0.595426  | -0.839746 | 1.242099  | Br                    | -0.528810 | 1.978250  | 2.590439  |
| B                     | 2.585613  | 2.460959  | -1.472545 | Br                    | 2.622424  | 2.050611  | -3.336295 |
| Br                    | -0.576693 | 1.352923  | -0.991188 | H                     | 4.059925  | -0.160041 | -1.186393 |
| H                     | 4.800241  | -1.075057 | 1.023746  | H                     | 4.290580  | 0.155718  | 3.109222  |
| H                     | 3.059406  | 2.315427  | 3.047121  | H                     | 1.882793  | 4.438614  | 2.557946  |
| H                     | 0.753474  | 6.461635  | 1.657050  | H                     | 0.417966  | 6.749026  | -0.776784 |
| H                     | 1.217541  | 4.993565  | -2.370704 | H                     | -3.229134 | 0.578291  | 1.084443  |
| H                     | -2.656299 | -0.734769 | 2.154623  | H                     | -2.721370 | -0.987169 | 0.382098  |
| H                     | 1.562247  | -0.319607 | 1.191533  | H                     | 0.556330  | -1.600722 | 0.449721  |
| H                     | 0.506008  | -1.331503 | 2.222243  | Br                    | -1.206190 | -2.290313 | -1.924509 |
| B                     | -1.545540 | -3.923681 | -1.014529 | Br                    | -1.848696 | -5.522857 | -1.988115 |
| Br                    | -1.582520 | -3.949190 | 0.890244  |                       |           |           |           |

TS-1[BBr<sub>3</sub>]

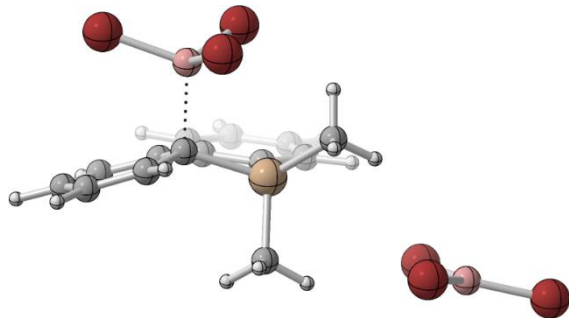

#p m062x/def2svp opt=(calcfc,ts,noeigen)  
freq empiricaldispersion=gd3 nosymm

Charge = 0, Multiplicity = 1, Point group = C1

Electronic Energy = -16323.897753 Hartree

Number of imaginary frequencies = 1,  $\nu_i = -102.75 \text{ cm}^{-1}$

Sum of electronic and zero-point Energies = -16323.647999 Hartree

Sum of electronic and thermal Energies = -16323.621090 Hartree

Sum of electronic and thermal Enthalpies = -16323.620146 Hartree

Sum of electronic and thermal Free Energies = -16323.712756 Hartree

| Cartesian Coordinates |           |           |           | Cartesian Coordinates |           |           |           |
|-----------------------|-----------|-----------|-----------|-----------------------|-----------|-----------|-----------|
| Atoms                 | X         | Y         | Z         | Atoms                 | X         | Y         | Z         |
| C                     | 0.495522  | 0.598643  | -1.263510 | C                     | 0.839313  | -0.766569 | -1.166372 |
| C                     | 1.737867  | -1.306630 | -2.087655 | C                     | 2.267450  | -0.506555 | -3.100118 |
| C                     | 1.909671  | 0.841851  | -3.196929 | C                     | 1.023310  | 1.400466  | -2.282228 |
| C                     | -0.421738 | 1.072219  | -0.213530 | C                     | -0.487877 | 0.259798  | 0.975567  |
| Si                    | -0.003970 | -1.518617 | 0.339681  | C                     | -1.262501 | 2.175351  | -0.367373 |
| C                     | -2.258882 | 2.415687  | 0.572631  | C                     | -2.460893 | 1.549479  | 1.658930  |
| C                     | -1.597383 | 0.489895  | 1.846582  | C                     | -1.667830 | -2.283557 | -0.087560 |
| C                     | 1.044183  | -2.703246 | 1.326969  | H                     | 2.043670  | -2.352929 | -2.014236 |
| H                     | 2.971598  | -0.931502 | -3.817275 | H                     | 2.339906  | 1.462580  | -3.983998 |
| H                     | 0.775004  | 2.461703  | -2.339618 | H                     | -1.180469 | 2.812106  | -1.249056 |
| H                     | -2.919297 | 3.275435  | 0.442492  | H                     | -3.274497 | 1.731685  | 2.360886  |
| H                     | -1.714033 | -0.148719 | 2.724777  | H                     | -2.217757 | -2.528666 | 0.834572  |
| H                     | -1.545185 | -3.209209 | -0.667494 | H                     | -2.271438 | -1.576190 | -0.674533 |
| H                     | 1.277348  | -3.556482 | 0.668759  | H                     | 1.980856  | -2.242728 | 1.663572  |
| H                     | 0.499179  | -3.082981 | 2.202477  | Br                    | 0.846523  | -0.318890 | 3.788697  |
| B                     | 1.002498  | 0.837175  | 2.167774  | Br                    | 0.706512  | 2.754833  | 2.565696  |
| Br                    | 2.709476  | 0.548924  | 1.204019  | Br                    | 0.495628  | -4.894464 | -2.052722 |
| B                     | 0.101102  | -6.318282 | -0.847297 | Br                    | 0.660843  | -8.082710 | -1.255705 |
| Br                    | -0.852486 | -5.959167 | 0.755278  |                       |           |           |           |



**TS-2[BBr<sub>3</sub>]**

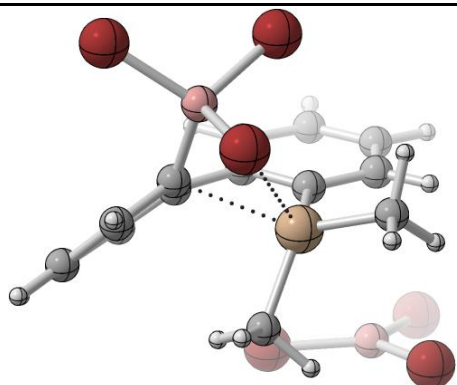

#p m062x/def2svp opt=(calcfc,ts,noeigen) freq  
empiricaldispersion=gd3 nosymm

Charge = 0, Multiplicity = 1, Point group = C1

Electronic Energy = -16323.886194 Hartree

Number of imaginary frequencies = 1,  $\nu_i = -143.12 \text{ cm}^{-1}$

Sum of electronic and zero-point Energies = -16323.635878 Hartree

Sum of electronic and thermal Energies = -16323.609256 Hartree

Sum of electronic and thermal Enthalpies = -16323.608312 Hartree

Sum of electronic and thermal Free Energies = -16323.698371  
Hartree

| Cartesian Coordinates |           |           |           | Cartesian Coordinates |           |           |           |
|-----------------------|-----------|-----------|-----------|-----------------------|-----------|-----------|-----------|
| Atoms                 | X         | Y         | Z         | Atoms                 | X         | Y         | Z         |
| C                     | 0.581965  | -1.411081 | -0.324418 | C                     | 0.314300  | -2.289030 | 0.737029  |
| C                     | 0.924463  | -3.550137 | 0.756456  | C                     | 1.735571  | -3.944736 | -0.304024 |
| C                     | 1.965582  | -3.075315 | -1.377242 | C                     | 1.393293  | -1.808595 | -1.392895 |
| C                     | -0.132436 | -0.130214 | -0.239632 | C                     | -0.329866 | 0.466262  | 1.041401  |
| Si                    | -0.820294 | -1.626490 | 2.066628  | C                     | -0.826212 | 0.332241  | -1.368458 |
| C                     | -1.788538 | 1.323183  | -1.245466 | C                     | -2.086440 | 1.855565  | 0.017062  |
| C                     | -1.370164 | 1.437989  | 1.122078  | C                     | -2.639399 | -1.430573 | 1.708510  |
| C                     | -0.511749 | -2.612853 | 3.618785  | Br                    | -0.216516 | 0.551467  | 4.023024  |
| B                     | 0.834218  | 0.746317  | 2.211191  | Br                    | 1.462460  | 2.645908  | 2.025950  |
| Br                    | 2.430733  | -0.463963 | 2.286788  | H                     | 0.759684  | -4.234979 | 1.591188  |
| H                     | 2.193718  | -4.934919 | -0.299699 | H                     | 2.612204  | -3.388506 | -2.198140 |
| H                     | 1.600790  | -1.116778 | -2.211238 | H                     | -0.653297 | -0.152096 | -2.331713 |
| H                     | -2.339675 | 1.658482  | -2.125833 | H                     | -2.861432 | 2.615130  | 0.123746  |
| H                     | -1.564572 | 1.910265  | 2.086709  | H                     | -3.069780 | -0.720960 | 2.430258  |
| H                     | -3.133304 | -2.406746 | 1.832329  | H                     | -2.811885 | -1.057456 | 0.690134  |
| H                     | -0.715623 | -3.668358 | 3.364513  | H                     | 0.533268  | -2.514220 | 3.941560  |
| H                     | -1.176048 | -2.304737 | 4.434933  | Br                    | -2.167358 | -3.144438 | -1.706728 |
| B                     | -1.719518 | -4.813608 | -0.920224 | Br                    | -0.789998 | -6.129132 | -1.923144 |
| Br                    | -2.277482 | -5.203480 | 0.865185  |                       |           |           |           |

**TS-3[BBr<sub>3</sub>]**

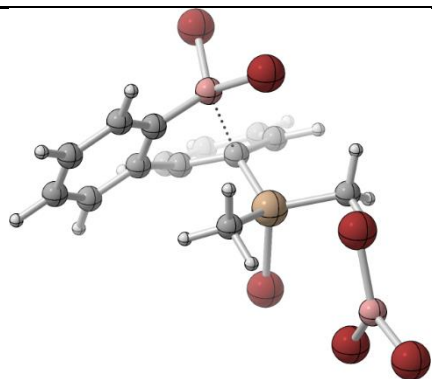

#p m062x/def2svp opt=(calcfc,ts,noeigen) freq  
empiricaldispersion=gd3 nosymm

Charge = 0, Multiplicity = 1, Point group = C1

Electronic Energy = -16323.920748 Hartree

Number of imaginary frequencies = 1,  $\nu_i = -174.64 \text{ cm}^{-1}$

Sum of electronic and zero-point Energies = -16323.669999 Hartree

Sum of electronic and thermal Energies = -16323.643160 Hartree

Sum of electronic and thermal Enthalpies = -16323.642215 Hartree

Sum of electronic and thermal Free Energies = -16323.735081 Hartree

| Cartesian Coordinates |           |           |           | Cartesian Coordinates |           |           |           |
|-----------------------|-----------|-----------|-----------|-----------------------|-----------|-----------|-----------|
| Atoms                 | X         | Y         | Z         | Atoms                 | X         | Y         | Z         |
| C                     | 1.793290  | -0.196361 | 0.044496  | C                     | 1.820506  | -0.888479 | -1.179741 |
| C                     | 2.711950  | -1.951544 | -1.339217 | C                     | 3.573899  | -2.288323 | -0.296212 |
| C                     | 3.551944  | -1.576257 | 0.909699  | C                     | 2.664422  | -0.517983 | 1.088278  |
| C                     | 0.757298  | 0.844136  | 0.023914  | C                     | 0.955924  | 2.147019  | 0.480987  |
| C                     | 0.065531  | 3.144535  | 0.100544  | C                     | -1.032155 | 2.862698  | -0.729458 |
| C                     | -1.274098 | 1.560035  | -1.119299 | C                     | -0.402803 | 0.499514  | -0.743978 |
| Si                    | -1.385303 | -1.063670 | -0.186833 | C                     | -2.982961 | -1.183295 | -1.146862 |
| C                     | -0.432447 | -2.647323 | 0.052867  | Br                    | -2.016082 | -0.475161 | 1.921866  |
| B                     | 0.810688  | -0.288767 | -2.240650 | Br                    | 1.432575  | 1.319769  | -3.210343 |
| Br                    | -0.174723 | -1.554274 | -3.404918 | H                     | 2.733731  | -2.510067 | -2.277686 |
| H                     | 4.276906  | -3.113833 | -0.418893 | H                     | 4.227660  | -1.860153 | 1.717731  |
| H                     | 2.621320  | 0.021995  | 2.036255  | H                     | 1.851136  | 2.391399  | 1.054994  |
| H                     | 0.244205  | 4.172684  | 0.421212  | H                     | -1.697851 | 3.666813  | -1.043538 |
| H                     | -2.158164 | 1.335834  | -1.721040 | H                     | -3.620142 | -0.315026 | -0.929503 |
| H                     | -3.519569 | -2.084176 | -0.818014 | H                     | -2.806088 | -1.253459 | -2.228558 |
| H                     | 0.428535  | -2.489044 | 0.717288  | H                     | -0.084090 | -3.064270 | -0.900902 |
| H                     | -1.117386 | -3.361481 | 0.533835  | Br                    | -2.916502 | -5.005629 | -1.476517 |
| B                     | -3.841848 | -5.292943 | 0.161544  | Br                    | -4.756728 | -6.928381 | 0.463164  |
| Br                    | -3.844943 | -3.935085 | 1.493789  |                       |           |           |           |

TS-4[BBr<sub>3</sub>]

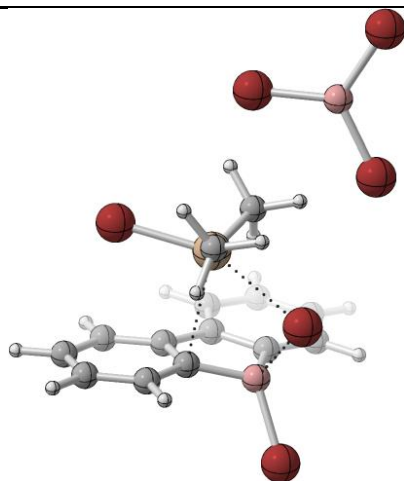

#p m062x/def2svp opt=(calcfc,ts,noeigen) freq  
empiricaldispersion=gd3 nosymm

Charge = 0, Multiplicity = 1, Point group = C1

Electronic Energy = -16323.898873 Hartree

Number of imaginary frequencies = 1,  $\nu_i = -130.51 \text{ cm}^{-1}$

Sum of electronic and zero-point Energies = -16323.647621 Hartree

Sum of electronic and thermal Energies = -16323.620927 Hartree

Sum of electronic and thermal Enthalpies = -16323.619983 Hartree

Sum of electronic and thermal Free Energies = -16323.712327 Hartree

| Cartesian Coordinates |           |           |           | Cartesian Coordinates |           |           |           |
|-----------------------|-----------|-----------|-----------|-----------------------|-----------|-----------|-----------|
| Atoms                 | X         | Y         | Z         | Atoms                 | X         | Y         | Z         |
| C                     | 3.211845  | 1.628353  | 0.467540  | C                     | 3.261536  | 0.938871  | -0.764541 |
| C                     | 4.226745  | -0.047178 | -0.952428 | C                     | 5.121699  | -0.348790 | 0.077868  |
| C                     | 5.061836  | 0.338535  | 1.294036  | C                     | 4.107545  | 1.336275  | 1.497199  |
| C                     | 2.103555  | 2.608827  | 0.477488  | C                     | 1.807932  | 3.584693  | 1.425349  |
| C                     | 0.730461  | 4.444257  | 1.195234  | C                     | -0.050483 | 4.340300  | 0.038812  |
| C                     | 0.250354  | 3.372003  | -0.916760 | C                     | 1.325192  | 2.493855  | -0.706150 |
| Si                    | -0.402279 | 0.405109  | 0.150936  | C                     | -2.060846 | 0.320307  | -0.700254 |
| C                     | 0.710614  | -0.904869 | 0.862681  | Br                    | -0.936180 | 1.626874  | 1.977321  |
| B                     | 2.115121  | 1.519450  | -1.709080 | Br                    | 2.701067  | 2.334131  | -3.428736 |
| Br                    | 0.679331  | -0.025699 | -2.195876 | H                     | 4.282590  | -0.583260 | -1.903156 |
| H                     | 5.875936  | -1.124494 | -0.065262 | H                     | 5.766639  | 0.092886  | 2.089982  |
| H                     | 4.061968  | 1.868703  | 2.449538  | H                     | 2.409675  | 3.690933  | 2.329802  |
| H                     | 0.492652  | 5.212566  | 1.933328  | H                     | -0.883723 | 5.027105  | -0.114892 |
| H                     | -0.318443 | 3.313957  | -1.849652 | H                     | -2.168713 | 1.229438  | -1.310510 |
| H                     | -2.863312 | 0.294168  | 0.047564  | H                     | -2.107934 | -0.551284 | -1.366381 |
| H                     | 1.742418  | -0.517613 | 0.872098  | H                     | 0.686905  | -1.800042 | 0.227696  |
| H                     | 0.401316  | -1.129734 | 1.891330  | Br                    | -1.151991 | -3.369003 | -1.488393 |
| B                     | -2.181921 | -3.840280 | 0.040772  | Br                    | -2.933477 | -5.572492 | 0.189559  |
| Br                    | -2.457328 | -2.563199 | 1.429321  |                       |           |           |           |

### DMPPhenS

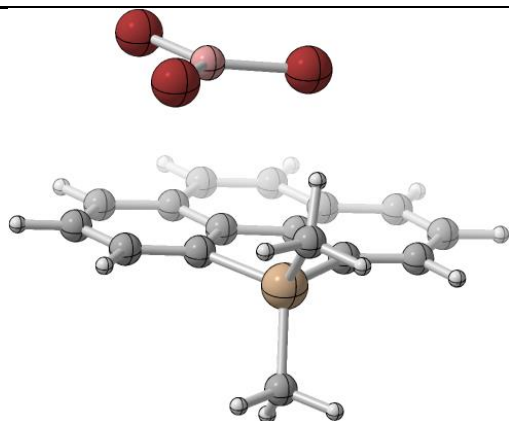

```
#p m062x/def2svp opt freq
empiricaldispersion=gd3 nosymm
```

Charge = 0, Multiplicity = 1, Point group = C1

Electronic Energy = -8653.473744 Hartree

Number of imaginary frequencies = 0

Sum of electronic and zero-point Energies = -8653.217117 Hartree

Sum of electronic and thermal Energies = -8653.195680 Hartree

Sum of electronic and thermal Enthalpies = -8653.194736 Hartree

Sum of electronic and thermal Free Energies = -8653.271473 Hartree

| Cartesian Coordinates |           |           |           | Cartesian Coordinates |           |           |           |
|-----------------------|-----------|-----------|-----------|-----------------------|-----------|-----------|-----------|
| Atoms                 | X         | Y         | Z         | Atoms                 | X         | Y         | Z         |
| C                     | -0.205878 | 2.407639  | -1.767450 | C                     | 0.093072  | 1.021692  | -1.789981 |
| C                     | 0.980729  | 0.563871  | -2.748969 | C                     | 1.561688  | 1.465469  | -3.669636 |
| C                     | 1.255618  | 2.814751  | -3.640729 | C                     | 0.352857  | 3.322478  | -2.678111 |
| C                     | -1.099842 | 2.863680  | -0.729375 | C                     | -1.564606 | 1.886631  | 0.188538  |
| Si                    | -0.898913 | 0.205568  | -0.395422 | C                     | -1.463015 | 4.220987  | -0.645534 |
| C                     | -2.349820 | 4.596221  | 0.389118  | C                     | -2.809655 | 3.654556  | 1.293579  |
| C                     | -2.415610 | 2.300886  | 1.201809  | C                     | -2.295754 | -0.864020 | -1.057361 |
| C                     | 0.132302  | -0.775680 | 0.826287  | C                     | -0.022031 | 4.711713  | -2.562437 |
| C                     | -0.890324 | 5.137296  | -1.602280 | H                     | 1.246789  | -0.494649 | -2.806524 |
| H                     | 2.262961  | 1.089648  | -4.416609 | H                     | 1.712145  | 3.498173  | -4.360078 |
| H                     | -2.655677 | 5.641034  | 0.479600  | H                     | -3.483020 | 3.962431  | 2.095177  |
| H                     | -2.795312 | 1.588993  | 1.939238  | H                     | -2.953738 | -1.194550 | -0.239638 |
| H                     | -1.898041 | -1.759114 | -1.558561 | H                     | -2.899850 | -0.299975 | -1.781583 |
| H                     | 0.474321  | -1.707460 | 0.349800  | H                     | 1.013366  | -0.213106 | 1.162514  |
| H                     | -0.464353 | -1.047864 | 1.710137  | H                     | 0.407368  | 5.426445  | -3.267792 |
| H                     | -1.160657 | 6.193457  | -1.537280 | Br                    | 0.582148  | 1.786131  | 3.470985  |
| B                     | 1.117549  | 3.041626  | 2.138817  | Br                    | 0.599824  | 4.859474  | 2.300086  |
| Br                    | 2.232130  | 2.494337  | 0.699885  |                       |           |           |           |

**IM-2\***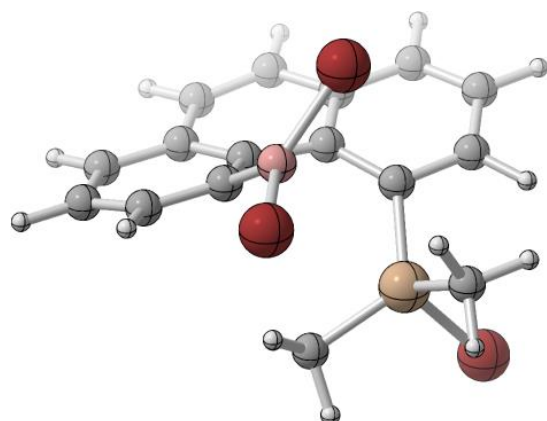

```
#p m062x/def2svp opt freq
empiricaldispersion=gd3 nosymm
```

Charge = 0, Multiplicity = 1, Point group = C1

Electronic Energy = -8653.475367 Hartree

Number of imaginary frequencies = 0

Sum of electronic and zero-point Energies = -8653.217515 Hartree

Sum of electronic and thermal Energies = -8653.196663 Hartree

Sum of electronic and thermal Enthalpies = -8653.195719 Hartree

Sum of electronic and thermal Free Energies = -8653.268898 Hartree

| Cartesian Coordinates |           |           |           | Cartesian Coordinates |           |           |           |
|-----------------------|-----------|-----------|-----------|-----------------------|-----------|-----------|-----------|
| Atoms                 | X         | Y         | Z         | Atoms                 | X         | Y         | Z         |
| C                     | 3.033978  | 1.833783  | 0.347710  | C                     | 2.882828  | 0.737975  | -0.562106 |
| C                     | 3.816658  | -0.303501 | -0.514448 | C                     | 4.940321  | -0.251839 | 0.323423  |
| C                     | 5.182704  | 0.892367  | 1.054061  | C                     | 4.261536  | 1.962753  | 1.049754  |
| C                     | 2.022657  | 2.864256  | 0.529038  | C                     | 2.467241  | 4.141477  | 0.974406  |
| C                     | 1.593732  | 5.246766  | 0.915715  | C                     | 0.288336  | 5.082502  | 0.503377  |
| C                     | -0.197993 | 3.786115  | 0.272589  | C                     | 0.624458  | 2.661945  | 0.318917  |
| Si                    | -0.365930 | 1.049035  | 0.501151  | C                     | -1.512382 | 0.783159  | -0.954756 |
| C                     | 0.534946  | -0.486974 | 1.075269  | Br                    | -1.771161 | 1.497393  | 2.237478  |
| B                     | 2.016264  | 0.764204  | -1.852131 | Br                    | 1.712715  | 2.363946  | -2.857325 |
| Br                    | 1.394950  | -0.877115 | -2.659033 | C                     | 4.599537  | 3.212836  | 1.676953  |
| C                     | 3.778825  | 4.283630  | 1.549667  | H                     | 3.703445  | -1.154395 | -1.187600 |
| H                     | 5.648293  | -1.080961 | 0.337403  | H                     | 6.101528  | 0.996067  | 1.635132  |
| H                     | 1.964639  | 6.227737  | 1.219491  | H                     | -0.386517 | 5.937081  | 0.442582  |
| H                     | -1.274316 | 3.662976  | 0.124901  | H                     | -2.193543 | 1.640730  | -1.050060 |
| H                     | -2.120914 | -0.117038 | -0.785083 | H                     | -0.968339 | 0.666781  | -1.902239 |
| H                     | 1.314713  | -0.228636 | 1.806601  | H                     | 0.994028  | -1.046737 | 0.251107  |
| H                     | -0.206219 | -1.130401 | 1.570812  | H                     | 5.560601  | 3.295803  | 2.187433  |
| H                     | 4.069230  | 5.262449  | 1.935940  |                       |           |           |           |

IM-3\*

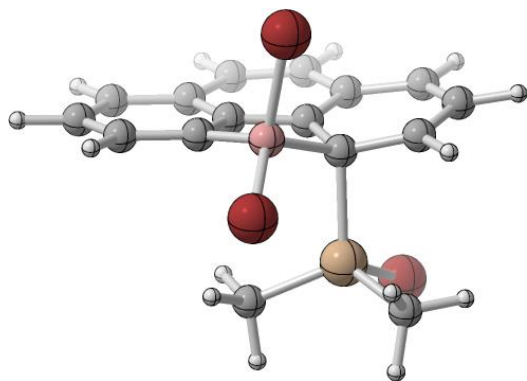

```
#p m062x/def2svp opt freq
empiricaldispersion=gd3 nosymm
```

Charge = 0, Multiplicity = 1, Point group = C1

Electronic Energy = -8653.471048 Hartree

Number of imaginary frequencies = 0

Sum of electronic and zero-point Energies = -8653.213243 Hartree

Sum of electronic and thermal Energies = -8653.192588 Hartree

Sum of electronic and thermal Enthalpies = -8653.191643 Hartree

Sum of electronic and thermal Free Energies = -8653.263383 Hartree

| Cartesian Coordinates |           |           |           | Cartesian Coordinates |           |           |           |
|-----------------------|-----------|-----------|-----------|-----------------------|-----------|-----------|-----------|
| Atoms                 | X         | Y         | Z         | Atoms                 | X         | Y         | Z         |
| C                     | 3.128889  | 1.722684  | 0.480583  | C                     | 3.090832  | 0.872028  | -0.644009 |
| C                     | 4.084225  | -0.090677 | -0.723144 | C                     | 5.081604  | -0.142567 | 0.277731  |
| C                     | 5.133385  | 0.758394  | 1.338155  | C                     | 4.139864  | 1.751365  | 1.455783  |
| C                     | 2.059619  | 2.646705  | 0.501637  | C                     | 2.078054  | 3.751451  | 1.369259  |
| C                     | 1.098545  | 4.730786  | 1.135362  | C                     | 0.179273  | 4.611928  | 0.080255  |
| C                     | 0.145475  | 3.475414  | -0.718995 | C                     | 1.037589  | 2.382494  | -0.480462 |
| Si                    | -0.214802 | 1.081100  | 0.408981  | C                     | -1.791147 | 0.927728  | -0.573390 |
| C                     | 0.657073  | -0.482745 | 0.917057  | Br                    | -0.847300 | 2.017931  | 2.372226  |
| B                     | 1.915023  | 1.386905  | -1.618675 | Br                    | 2.661541  | 2.720756  | -2.955698 |
| Br                    | 0.923480  | -0.074589 | -2.607052 | C                     | 4.080942  | 2.821089  | 2.429233  |
| C                     | 3.121820  | 3.791627  | 2.369842  | H                     | 4.119520  | -0.789120 | -1.562110 |
| H                     | 5.863617  | -0.900282 | 0.199033  | H                     | 5.947662  | 0.706569  | 2.063225  |
| H                     | 1.067664  | 5.620294  | 1.769969  | H                     | -0.536055 | 5.415790  | -0.093520 |
| H                     | -0.608729 | 3.388757  | -1.505872 | H                     | -2.407417 | 1.826368  | -0.434937 |
| H                     | -2.351604 | 0.065457  | -0.182054 | H                     | -1.591599 | 0.763029  | -1.639382 |
| H                     | 1.478735  | -0.263271 | 1.612202  | H                     | 1.039086  | -1.042632 | 0.055235  |
| H                     | -0.093263 | -1.089689 | 1.447139  | H                     | 4.851940  | 2.869580  | 3.200852  |
| H                     | 3.132878  | 4.618412  | 3.082141  |                       |           |           |           |

**Br-PhenB**

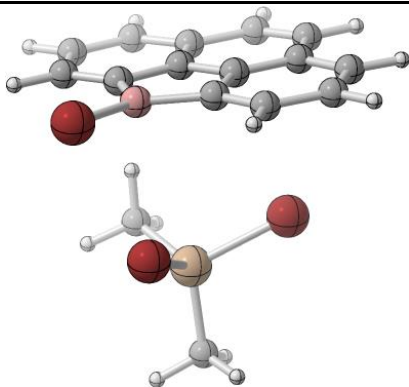

```
#p m062x/def2svp opt freq
empiricaldispersion=gd3 nosymm
```

Charge = 0, Multiplicity = 1, Point group = C1

Electronic Energy = -8653.501050 Hartree

Number of imaginary frequencies = 0

Sum of electronic and zero-point Energies = -8653.243512 Hartree

Sum of electronic and thermal Energies = -8653.222015 Hartree

Sum of electronic and thermal Enthalpies = -8653.221071 Hartree

Sum of electronic and thermal Free Energies = -8653.297987 Hartree

| Cartesian Coordinates |           |           |           | Cartesian Coordinates |           |           |           |
|-----------------------|-----------|-----------|-----------|-----------------------|-----------|-----------|-----------|
| Atoms                 | X         | Y         | Z         | Atoms                 | X         | Y         | Z         |
| C                     | 2.885818  | 2.292928  | 0.747237  | C                     | 3.086068  | 1.575517  | -0.456985 |
| C                     | 3.737262  | 0.358919  | -0.367030 | C                     | 4.160181  | -0.107324 | 0.906682  |
| C                     | 3.941018  | 0.616910  | 2.069281  | C                     | 3.279045  | 1.873167  | 2.017565  |
| C                     | 2.233631  | 3.547746  | 0.540007  | C                     | 1.957977  | 4.410794  | 1.598337  |
| C                     | 1.286445  | 5.611753  | 1.250178  | C                     | 0.949425  | 5.865836  | -0.070633 |
| C                     | 1.260724  | 4.960820  | -1.118783 | C                     | 1.916440  | 3.781004  | -0.818600 |
| B                     | 2.471510  | 2.512058  | -1.575398 | Br                    | 2.532632  | 2.233003  | -3.461850 |
| C                     | 2.984537  | 2.768130  | 3.115713  | C                     | 2.362016  | 3.971091  | 2.915725  |
| H                     | 3.932239  | -0.244921 | -1.256348 | H                     | 4.674251  | -1.067597 | 0.972520  |
| H                     | 4.283054  | 0.221414  | 3.028381  | H                     | 1.029155  | 6.336416  | 2.025966  |
| H                     | 0.428976  | 6.793612  | -0.313242 | H                     | 0.978912  | 5.204687  | -2.145632 |
| H                     | 3.272997  | 2.471719  | 4.126366  | H                     | 2.157431  | 4.619194  | 3.770696  |
| Si                    | -0.881400 | 0.468650  | 0.712229  | C                     | -2.607549 | -0.221056 | 0.795538  |
| C                     | 0.458771  | -0.692505 | 1.260344  | Br                    | -0.794541 | 2.310893  | 1.971390  |
| Br                    | -0.491227 | 1.055943  | -1.418429 | H                     | -3.333388 | 0.528223  | 0.452024  |
| H                     | -2.850440 | -0.499134 | 1.831508  | H                     | -2.688503 | -1.111719 | 0.155523  |
| H                     | 1.438577  | -0.200043 | 1.187152  | H                     | 0.465121  | -1.590248 | 0.624927  |
| H                     | 0.290155  | -0.989419 | 2.306043  |                       |           |           |           |

**TS-2\***

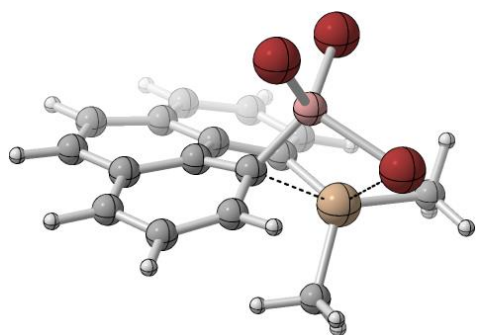

#p m062x/def2svp opt=(calcfc,ts,noeigen) freq  
empiricaldispersion=gd3 nosymm

Charge = 0, Multiplicity = 1, Point group = C1

Electronic Energy = -8653.426023 Hartree

Number of imaginary frequencies = 1,  $\nu_i = -141.14 \text{ cm}^{-1}$

Sum of electronic and zero-point Energies = -8653.169585 Hartree

Sum of electronic and thermal Energies = -8653.149507 Hartree

Sum of electronic and thermal Enthalpies = -8653.148563 Hartree

Sum of electronic and thermal Free Energies = -8653.218278 Hartree

| Atoms | Cartesian Coordinates |           |           | Atoms | Cartesian Coordinates |           |           |
|-------|-----------------------|-----------|-----------|-------|-----------------------|-----------|-----------|
|       | X                     | Y         | Z         |       | X                     | Y         | Z         |
| C     | 0.465263              | -1.414039 | -0.294792 | C     | 0.353798              | -2.249757 | 0.837197  |
| C     | 0.958835              | -3.501113 | 0.802867  | C     | 1.607764              | -3.937440 | -0.366269 |
| C     | 1.614500              | -3.156318 | -1.512241 | C     | 1.010088              | -1.884070 | -1.512128 |
| C     | -0.122079             | -0.110570 | -0.211558 | C     | -0.463143             | 0.439754  | 1.068371  |
| Si    | -0.758368             | -1.622773 | 2.214515  | C     | -0.479994             | 0.535203  | -1.418926 |
| C     | -1.403472             | 1.594163  | -1.355512 | C     | -1.962216             | 1.968670  | -0.138872 |
| C     | -1.482041             | 1.418411  | 1.050536  | C     | -2.585295             | -1.621736 | 1.816114  |
| C     | -0.388810             | -2.661769 | 3.726830  | Br    | -0.508629             | 0.490559  | 4.047160  |
| B     | 0.632209              | 0.796918  | 2.287757  | Br    | 1.152915              | 2.731224  | 2.188813  |
| Br    | 2.294641              | -0.308457 | 2.423946  | C     | 0.838002              | -1.078620 | -2.695431 |
| C     | 0.072125              | 0.044058  | -2.659474 | H     | 0.914686              | -4.168174 | 1.665967  |
| H     | 2.071331              | -4.924929 | -0.384780 | H     | 2.067491              | -3.532459 | -2.431701 |
| H     | -1.707286             | 2.092650  | -2.278854 | H     | -2.717550             | 2.754120  | -0.103338 |
| H     | -1.816789             | 1.848265  | 1.997455  | H     | -3.107292             | -0.906731 | 2.467188  |
| H     | -2.989951             | -2.628287 | 2.004187  | H     | -2.758402             | -1.344214 | 0.768156  |
| H     | -0.497364             | -3.721372 | 3.439592  | H     | 0.637834              | -2.488830 | 4.076600  |
| H     | -1.089184             | -2.441109 | 4.542040  | H     | 1.269006              | -1.427510 | -3.635606 |
| H     | -0.140881             | 0.600485  | -3.574228 |       |                       |           |           |



**TS-3\***

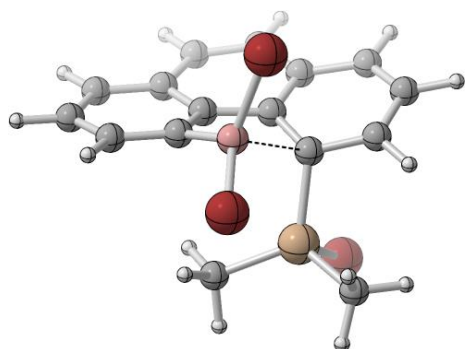

#p m062x/def2svp opt=(calcfc,ts,noeigen) freq  
empiricaldispersion=gd3 nosymm

Charge = 0, Multiplicity = 1, Point group = C1

Electronic Energy = -8653.464239 Hartree

Number of imaginary frequencies = 1,  $\nu_i = -180.82 \text{ cm}^{-1}$

Sum of electronic and zero-point Energies = -8653.207177 Hartree

Sum of electronic and thermal Energies = -8653.186901 Hartree

Sum of electronic and thermal Enthalpies = -8653.185957 Hartree

Sum of electronic and thermal Free Energies = -8653.257252 Hartree

| Cartesian Coordinates |           |           |           | Cartesian Coordinates |           |           |           |
|-----------------------|-----------|-----------|-----------|-----------------------|-----------|-----------|-----------|
| Atoms                 | X         | Y         | Z         | Atoms                 | X         | Y         | Z         |
| C                     | 1.809556  | -0.231201 | -0.118514 | C                     | 1.752078  | -1.141252 | -1.196167 |
| C                     | 2.698283  | -2.156247 | -1.237177 | C                     | 3.713832  | -2.205092 | -0.260247 |
| C                     | 3.828721  | -1.227967 | 0.719899  | C                     | 2.881081  | -0.186096 | 0.794402  |
| C                     | 0.763033  | 0.735044  | -0.071034 | C                     | 0.958497  | 1.927067  | 0.653228  |
| C                     | 0.048737  | 2.976831  | 0.419554  | C                     | -0.996978 | 2.826921  | -0.487854 |
| C                     | -1.259542 | 1.581515  | -1.066961 | C                     | -0.426653 | 0.470013  | -0.823695 |
| Si                    | -1.503204 | -0.988333 | -0.186846 | C                     | -3.060290 | -1.174476 | -1.202756 |
| C                     | -0.627093 | -2.565682 | 0.284106  | Br                    | -2.209665 | -0.186333 | 1.826424  |
| B                     | 0.735778  | -0.726596 | -2.330621 | Br                    | 1.283257  | 0.757669  | -3.494201 |
| Br                    | -0.284769 | -2.122935 | -3.262053 | C                     | 2.965774  | 0.961201  | 1.667474  |
| C                     | 2.084424  | 1.994818  | 1.556250  | H                     | 2.688858  | -2.887608 | -2.048443 |
| H                     | 4.459816  | -2.999986 | -0.309076 | H                     | 4.664993  | -1.248931 | 1.421468  |
| H                     | 0.182522  | 3.926328  | 0.943158  | H                     | -1.666530 | 3.665229  | -0.682476 |
| H                     | -2.178814 | 1.454621  | -1.644902 | H                     | -3.734503 | -0.326345 | -1.022386 |
| H                     | -3.579329 | -2.089305 | -0.880915 | H                     | -2.845288 | -1.254215 | -2.276306 |
| H                     | 0.205503  | -2.352291 | 0.968941  | H                     | -0.250841 | -3.122410 | -0.582476 |
| H                     | -1.363405 | -3.182433 | 0.821668  | H                     | 3.791370  | 1.017932  | 2.379518  |
| H                     | 2.209009  | 2.893077  | 2.163886  |                       |           |           |           |

**TS-4\***

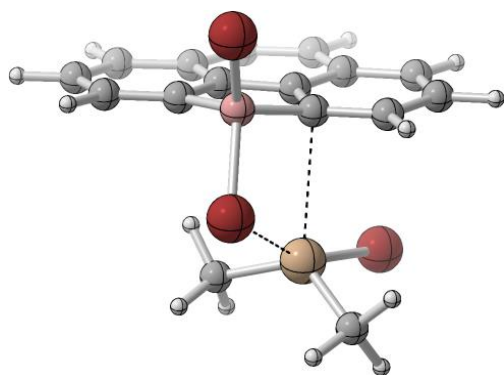

#p m062x/def2svp opt=(calcfc,ts,noeigen) freq  
empiricaldispersion=gd3 nosymm

Charge = 0, Multiplicity = 1, Point group = C1

Electronic Energy = -8653.445432 Hartree

Number of imaginary frequencies = 1,  $\nu_i = -128.00 \text{ cm}^{-1}$

Sum of electronic and zero-point Energies = -8653.188156 Hartree

Sum of electronic and thermal Energies = -8653.167833 Hartree

Sum of electronic and thermal Enthalpies = -8653.166889 Hartree

Sum of electronic and thermal Free Energies = -8653.238590  
Hartree

| Cartesian Coordinates |           |           |           | Cartesian Coordinates |           |           |           |
|-----------------------|-----------|-----------|-----------|-----------------------|-----------|-----------|-----------|
| Atoms                 | X         | Y         | Z         | Atoms                 | X         | Y         | Z         |
| C                     | 3.177981  | 1.624236  | 0.371142  | C                     | 3.247328  | 0.867496  | -0.821582 |
| C                     | 4.255820  | -0.076674 | -0.893267 | C                     | 5.143267  | -0.237881 | 0.201527  |
| C                     | 5.059732  | 0.535391  | 1.351472  | C                     | 4.049816  | 1.520783  | 1.462057  |
| C                     | 2.101199  | 2.555177  | 0.375903  | C                     | 1.912559  | 3.467014  | 1.417328  |
| C                     | 0.843955  | 4.380201  | 1.246509  | C                     | 0.042108  | 4.333958  | 0.109715  |
| C                     | 0.253005  | 3.385667  | -0.912682 | C                     | 1.298921  | 2.465495  | -0.790841 |
| B                     | 2.094053  | 1.456998  | -1.786157 | Br                    | 2.734676  | 2.273050  | -3.485740 |
| C                     | 3.825551  | 2.436685  | 2.559556  | C                     | 2.822767  | 3.368863  | 2.535144  |
| H                     | 4.386363  | -0.695460 | -1.784169 | H                     | 5.930960  | -0.990341 | 0.131316  |
| H                     | 5.774367  | 0.388917  | 2.163974  | H                     | 0.641700  | 5.126663  | 2.018300  |
| H                     | -0.773817 | 5.051196  | 0.010235  | H                     | -0.373611 | 3.399137  | -1.809116 |
| H                     | 4.489738  | 2.385861  | 3.425128  | H                     | 2.699063  | 4.052962  | 3.377075  |
| Si                    | -0.397588 | 0.418474  | 0.088574  | C                     | -2.082463 | 0.189562  | -0.678460 |
| C                     | 0.677227  | -0.934657 | 0.777629  | Br                    | -0.907483 | 1.631660  | 1.924555  |
| H                     | -2.323417 | 1.073431  | -1.286574 | H                     | -2.836222 | 0.090373  | 0.113588  |
| H                     | -2.081264 | -0.690477 | -1.335448 | H                     | 1.723814  | -0.595224 | 0.820296  |
| H                     | 0.628459  | -1.812408 | 0.119758  | H                     | 0.340968  | -1.175781 | 1.794757  |
| Br                    | 0.622586  | -0.023786 | -2.287704 |                       |           |           |           |

**DMPPhenS[BBr<sub>3</sub>]**

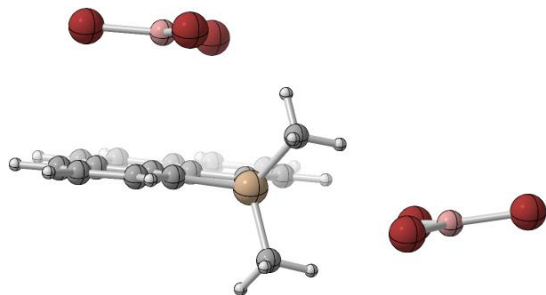

```
#p m062x/def2svp opt freq
empiricaldispersion=gd3 nosymm

Charge = 0, Multiplicity = 1, Point group = C1

Electronic Energy = -16400.068216 Hartree

Number of imaginary frequencies = 0
Sum of electronic and zero-point Energies = -16399.805154 Hartree
Sum of electronic and thermal Energies = -16399.776279 Hartree
Sum of electronic and thermal Enthalpies = -16399.775335 Hartree
Sum of electronic and thermal Free Energies = -16399.876708 Hartree
```

| Cartesian Coordinates |           |           |           | Cartesian Coordinates |           |           |           |
|-----------------------|-----------|-----------|-----------|-----------------------|-----------|-----------|-----------|
| Atoms                 | X         | Y         | Z         | Atoms                 | X         | Y         | Z         |
| C                     | -0.206917 | 2.396893  | -1.771539 | C                     | 0.094465  | 1.010918  | -1.795772 |
| C                     | 0.993799  | 0.561135  | -2.747871 | C                     | 1.577922  | 1.465974  | -3.663097 |
| C                     | 1.264847  | 2.813441  | -3.635540 | C                     | 0.354533  | 3.315372  | -2.677236 |
| C                     | -1.101283 | 2.850864  | -0.732961 | C                     | -1.562355 | 1.872195  | 0.184594  |
| Si                    | -0.902014 | 0.189535  | -0.404770 | C                     | -1.465121 | 4.207876  | -0.646023 |
| C                     | -2.350328 | 4.580897  | 0.390763  | C                     | -2.807532 | 3.637324  | 1.294504  |
| C                     | -2.412196 | 2.284161  | 1.199696  | C                     | -2.329262 | -0.845485 | -1.056473 |
| C                     | 0.139024  | -0.774703 | 0.822128  | C                     | -0.022347 | 4.703879  | -2.559687 |
| C                     | -0.892888 | 5.126711  | -1.600445 | H                     | 1.270041  | -0.494669 | -2.801525 |
| H                     | 2.287708  | 1.093849  | -4.403808 | H                     | 1.723310  | 3.500104  | -4.350561 |
| H                     | -2.656366 | 5.625440  | 0.483763  | H                     | -3.479520 | 3.943327  | 2.098006  |
| H                     | -2.789754 | 1.570656  | 1.936743  | H                     | -2.975410 | -1.174211 | -0.228004 |
| H                     | -1.967982 | -1.739987 | -1.583961 | H                     | -2.935376 | -0.247730 | -1.752091 |
| H                     | 0.538914  | -1.676776 | 0.334420  | H                     | 0.983325  | -0.174663 | 1.187381  |
| H                     | -0.463719 | -1.094356 | 1.685932  | H                     | 0.408437  | 5.420375  | -3.262421 |
| H                     | -1.164083 | 6.182545  | -1.533419 | Br                    | 0.585935  | 1.819733  | 3.473277  |
| B                     | 1.120989  | 3.063463  | 2.130047  | Br                    | 0.608342  | 4.884021  | 2.279325  |
| Br                    | 2.230640  | 2.502910  | 0.692546  | Br                    | 0.487693  | -3.340954 | -2.271130 |
| B                     | 0.040886  | -4.644269 | -0.955483 | Br                    | 0.941013  | -6.314031 | -0.938701 |
| Br                    | -1.302917 | -4.266295 | 0.332066  |                       |           |           |           |

**IM-2\*[BBr<sub>3</sub>]**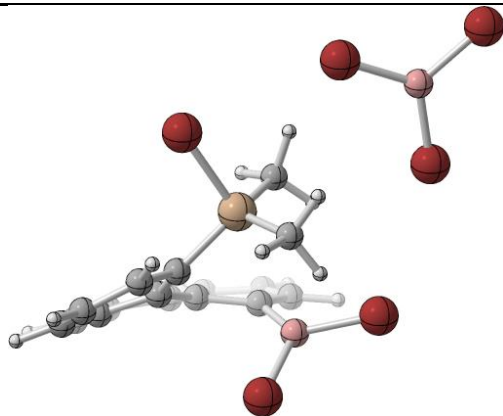

```
#p m062x/def2svp opt freq
empiricaldispersion=gd3 nosymm
```

Charge = 0, Multiplicity = 1, Point group = C1

Electronic Energy = -16400.072939 Hartree

Number of imaginary frequencies = 0

Sum of electronic and zero-point Energies = -16399.808281 Hartree

Sum of electronic and thermal Energies = -16399.780244 Hartree

Sum of electronic and thermal Enthalpies = -16399.779300 Hartree

Sum of electronic and thermal Free Energies = -16399.874120 Hartree

| Cartesian Coordinates |           |           |           | Cartesian Coordinates |           |           |           |
|-----------------------|-----------|-----------|-----------|-----------------------|-----------|-----------|-----------|
| Atoms                 | X         | Y         | Z         | Atoms                 | X         | Y         | Z         |
| C                     | 3.032160  | 1.830356  | 0.344477  | C                     | 2.885270  | 0.736139  | -0.568388 |
| C                     | 3.822642  | -0.302556 | -0.522079 | C                     | 4.944959  | -0.250349 | 0.317104  |
| C                     | 5.183072  | 0.892635  | 1.050980  | C                     | 4.259028  | 1.960377  | 1.048079  |
| C                     | 2.018287  | 2.858117  | 0.528671  | C                     | 2.460803  | 4.135121  | 0.977577  |
| C                     | 1.586140  | 5.239538  | 0.921562  | C                     | 0.281360  | 5.074460  | 0.507938  |
| C                     | -0.202670 | 3.777943  | 0.273630  | C                     | 0.620365  | 2.654119  | 0.318042  |
| Si                    | -0.370855 | 1.039037  | 0.498741  | C                     | -1.519228 | 0.794225  | -0.958202 |
| C                     | 0.549043  | -0.481539 | 1.083309  | Br                    | -1.766915 | 1.506699  | 2.242664  |
| B                     | 2.017977  | 0.760629  | -1.857478 | Br                    | 1.687033  | 2.358597  | -2.854953 |
| Br                    | 1.426771  | -0.886783 | -2.680499 | C                     | 4.594124  | 3.209065  | 1.679477  |
| C                     | 3.771529  | 4.278515  | 1.554339  | H                     | 3.712812  | -1.152371 | -1.196935 |
| H                     | 5.655028  | -1.077678 | 0.329764  | H                     | 6.100735  | 0.997551  | 1.633673  |
| H                     | 1.955655  | 6.220050  | 1.228485  | H                     | -0.394889 | 5.928085  | 0.449052  |
| H                     | -1.278864 | 3.654204  | 0.125726  | H                     | -2.086050 | 1.719557  | -1.136397 |
| H                     | -2.234199 | -0.010771 | -0.736383 | H                     | -0.976418 | 0.538021  | -1.879141 |
| H                     | 1.324769  | -0.198433 | 1.810428  | H                     | 1.017199  | -1.040437 | 0.263243  |
| H                     | -0.179721 | -1.134946 | 1.584774  | H                     | 5.554497  | 3.292118  | 2.191227  |
| H                     | 4.059403  | 5.256884  | 1.943633  | Br                    | -1.201811 | -2.985871 | -1.048764 |
| B                     | -2.530477 | -3.352311 | 0.263545  | Br                    | -3.280251 | -5.091854 | 0.402461  |
| Br                    | -3.093184 | -1.964414 | 1.432287  |                       |           |           |           |

**IM-3[BBr<sub>3</sub>]**

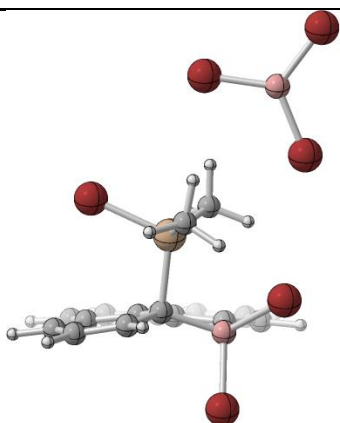

#p m062x/def2svp opt freq empiricaldispersion=gd3  
nosymm

Charge = 0, Multiplicity = 1, Point group = C1

Electronic Energy = -16400.068415 Hartree

Number of imaginary frequencies = 0

Sum of electronic and zero-point Energies = -16399.803628 Hartree

Sum of electronic and thermal Energies = -16399.775871 Hartree

Sum of electronic and thermal Enthalpies = -16399.774927 Hartree

Sum of electronic and thermal Free Energies = -16399.868709 Hartree

| Cartesian Coordinates |           |           |           | Cartesian Coordinates |           |           |           |
|-----------------------|-----------|-----------|-----------|-----------------------|-----------|-----------|-----------|
| Atoms                 | X         | Y         | Z         | Atoms                 | X         | Y         | Z         |
| C                     | 3.130154  | 1.715893  | 0.474923  | C                     | 3.095287  | 0.868631  | -0.652154 |
| C                     | 4.095155  | -0.086848 | -0.736977 | C                     | 5.094572  | -0.136328 | 0.261913  |
| C                     | 5.141119  | 0.759537  | 1.326788  | C                     | 4.141054  | 1.745203  | 1.450223  |
| C                     | 2.055290  | 2.633616  | 0.501009  | C                     | 2.065329  | 3.731319  | 1.377587  |
| C                     | 1.081553  | 4.707790  | 1.148842  | C                     | 0.170343  | 4.594828  | 0.086558  |
| C                     | 0.147366  | 3.465542  | -0.723762 | C                     | 1.037938  | 2.371849  | -0.486167 |
| Si                    | -0.228376 | 1.068026  | 0.405786  | C                     | -1.799537 | 0.962381  | -0.591007 |
| C                     | 0.687234  | -0.461322 | 0.942873  | Br                    | -0.886258 | 2.003371  | 2.362258  |
| B                     | 1.908886  | 1.373606  | -1.619255 | Br                    | 2.635404  | 2.690924  | -2.981655 |
| Br                    | 0.920770  | -0.112321 | -2.587848 | C                     | 4.074222  | 2.807069  | 2.431719  |
| C                     | 3.107605  | 3.770495  | 2.379840  | H                     | 4.132928  | -0.782485 | -1.578199 |
| H                     | 5.881493  | -0.888470 | 0.178790  | H                     | 5.955962  | 0.709235  | 2.051342  |
| H                     | 1.043078  | 5.591186  | 1.791489  | H                     | -0.546358 | 5.397756  | -0.085918 |
| H                     | -0.597283 | 3.385544  | -1.520071 | H                     | -2.337825 | 1.917261  | -0.514378 |
| H                     | -2.431886 | 0.180057  | -0.147403 | H                     | -1.605185 | 0.716203  | -1.642319 |
| H                     | 1.480052  | -0.188066 | 1.653103  | H                     | 1.116433  | -1.015376 | 0.099839  |
| H                     | -0.046384 | -1.093549 | 1.465789  | H                     | 4.844522  | 2.855098  | 3.204067  |
| H                     | 3.111787  | 4.591422  | 3.098978  | Br                    | -1.448229 | -2.631301 | -0.996510 |
| B                     | -2.604631 | -3.119341 | 0.427142  | Br                    | -3.519487 | -4.781536 | 0.405695  |
| Br                    | -2.852731 | -1.924259 | 1.895410  |                       |           |           |           |

**Br-PhenB[BBr<sub>3</sub>]**

```
#p m062x/def2svp opt freq
empiricaldispersion=gd3 nosymm
```

Charge = 0, Multiplicity = 1, Point group = C1

Electronic Energy = -16400.097300 Hartree

Number of imaginary frequencies = 0

Sum of electronic and zero-point Energies = -16399.833157 Hartree

Sum of electronic and thermal Energies = -16399.804339 Hartree

Sum of electronic and thermal Enthalpies = -16399.803395 Hartree

Sum of electronic and thermal Free Energies = -16399.903843 Hartree

| Cartesian Coordinates |           |           |           | Cartesian Coordinates |           |           |           |
|-----------------------|-----------|-----------|-----------|-----------------------|-----------|-----------|-----------|
| Atoms                 | X         | Y         | Z         | Atoms                 | X         | Y         | Z         |
| C                     | 2.887712  | 2.289815  | 0.747183  | C                     | 3.084844  | 1.569905  | -0.456088 |
| C                     | 3.734444  | 0.352574  | -0.365052 | C                     | 4.160625  | -0.111130 | 0.908442  |
| C                     | 3.945850  | 0.616112  | 2.069934  | C                     | 3.283875  | 1.872378  | 2.017391  |
| C                     | 2.233225  | 3.543300  | 0.539380  | C                     | 1.956627  | 4.406631  | 1.597217  |
| C                     | 1.282232  | 5.605853  | 1.248632  | C                     | 0.943740  | 5.858231  | -0.072102 |
| C                     | 1.255900  | 4.952928  | -1.119748 | C                     | 1.914040  | 3.774632  | -0.819098 |
| B                     | 2.468831  | 2.504997  | -1.574795 | Br                    | 2.531305  | 2.224886  | -3.461605 |
| C                     | 2.989115  | 2.767998  | 3.114903  | C                     | 2.363184  | 3.969096  | 2.914527  |
| H                     | 3.925769  | -0.253836 | -1.253439 | H                     | 4.673502  | -1.071984 | 0.975050  |
| H                     | 4.290460  | 0.222667  | 3.028949  | H                     | 1.023896  | 6.330474  | 2.024107  |
| H                     | 0.421112  | 6.784698  | -0.315036 | H                     | 0.972398  | 5.195206  | -2.146510 |
| H                     | 3.279348  | 2.473236  | 4.125526  | H                     | 2.157823  | 4.617363  | 3.769178  |
| Si                    | -0.884210 | 0.452766  | 0.708142  | C                     | -2.619189 | -0.214514 | 0.788717  |
| C                     | 0.476484  | -0.679818 | 1.265506  | Br                    | -0.802751 | 2.296432  | 1.971963  |
| Br                    | -0.492023 | 1.066911  | -1.419347 | H                     | -3.330983 | 0.567589  | 0.490906  |
| H                     | -2.850279 | -0.531957 | 1.816334  | H                     | -2.729491 | -1.074937 | 0.113453  |
| H                     | 1.434510  | -0.141307 | 1.242385  | H                     | 0.543275  | -1.557727 | 0.607376  |
| H                     | 0.282122  | -1.013009 | 2.296032  | Br                    | -0.942139 | -2.692039 | -1.778216 |
| B                     | -1.357530 | -4.167774 | -0.654967 | Br                    | -1.520541 | -5.912322 | -1.381157 |
| Br                    | -1.609581 | -3.886123 | 1.212079  |                       |           |           |           |

**TS-2\*[BBr<sub>3</sub>]**

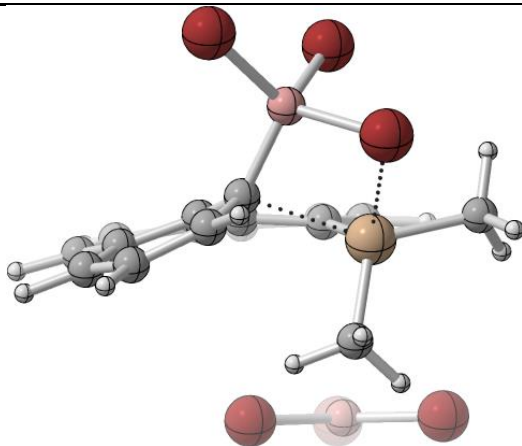

#p m062x/def2svp opt=(calcfc,ts,noeigen)  
freq empiricaldispersion=gd3 nosymm

Charge = 0, Multiplicity = 1, Point group = C1

Electronic Energy = -16400.030328 Hartree

Number of imaginary frequencies = 1,  $\nu_i = -140.09 \text{ cm}^{-1}$

Sum of electronic and zero-point Energies = -16399.767205 Hartree

Sum of electronic and thermal Energies = -16399.739923 Hartree

Sum of electronic and thermal Enthalpies = -16399.738979 Hartree

Sum of electronic and thermal Free Energies = -16399.829924 Hartree

| Cartesian Coordinates |           |           |           | Cartesian Coordinates |           |           |           |
|-----------------------|-----------|-----------|-----------|-----------------------|-----------|-----------|-----------|
| Atoms                 | X         | Y         | Z         | Atoms                 | X         | Y         | Z         |
| C                     | 0.495953  | -1.407729 | -0.289166 | C                     | 0.371892  | -2.251029 | 0.834355  |
| C                     | 0.978586  | -3.502505 | 0.798241  | C                     | 1.631907  | -3.933523 | -0.370504 |
| C                     | 1.640701  | -3.147257 | -1.514637 | C                     | 1.041558  | -1.873601 | -1.508179 |
| C                     | -0.109158 | -0.112574 | -0.203846 | C                     | -0.449370 | 0.434020  | 1.077547  |
| Si                    | -0.767522 | -1.634617 | 2.193758  | C                     | -0.490041 | 0.519630  | -1.411477 |
| C                     | -1.424895 | 1.568035  | -1.344466 | C                     | -1.970152 | 1.947435  | -0.123113 |
| C                     | -1.473728 | 1.407216  | 1.063915  | C                     | -2.594979 | -1.575807 | 1.805180  |
| C                     | -0.415741 | -2.668349 | 3.711285  | Br                    | -0.487934 | 0.498746  | 4.060847  |
| B                     | 0.645282  | 0.787147  | 2.302766  | Br                    | 1.175766  | 2.719005  | 2.183437  |
| Br                    | 2.304498  | -0.325107 | 2.440214  | C                     | 0.845269  | -1.077266 | -2.693743 |
| C                     | 0.056449  | 0.029289  | -2.655647 | H                     | 0.923748  | -4.176465 | 1.655710  |
| H                     | 2.090663  | -4.923433 | -0.393356 | H                     | 2.085228  | -3.525402 | -2.437471 |
| H                     | -1.745653 | 2.056475  | -2.267446 | H                     | -2.731234 | 2.727139  | -0.083735 |
| H                     | -1.805297 | 1.836158  | 2.012341  | H                     | -3.074259 | -0.835499 | 2.461654  |
| H                     | -3.038779 | -2.564108 | 1.998739  | H                     | -2.767824 | -1.293342 | 0.758514  |
| H                     | -0.535162 | -3.726177 | 3.419176  | H                     | 0.611126  | -2.506699 | 4.065629  |
| H                     | -1.118928 | -2.440691 | 4.521960  | H                     | 1.271306  | -1.424535 | -3.636722 |
| H                     | -0.177250 | 0.575882  | -3.571317 | Br                    | -2.148599 | -3.292213 | -1.613892 |
| B                     | -1.676402 | -4.953652 | -0.829596 | Br                    | -0.810524 | -6.290351 | -1.866315 |
| Br                    | -2.141186 | -5.325385 | 0.985460  |                       |           |           |           |

TS-3\*[BBr<sub>3</sub>]

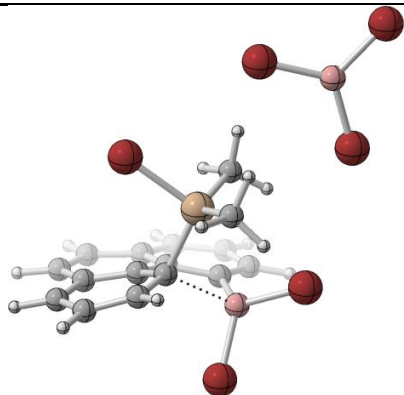

#p m062x/def2svp opt=(calcfc,ts,noeigen) freq  
empiricaldispersion=gd3 nosymm

Charge = 0, Multiplicity = 1, Point group = C1

Electronic Energy = -16400.060981 Hartree

Number of imaginary frequencies = 1,  $\nu_i = -184.01 \text{ cm}^{-1}$

Sum of electronic and zero-point Energies = -16399.796799 Hartree

Sum of electronic and thermal Energies = -16399.769448 Hartree

Sum of electronic and thermal Enthalpies = -16399.768503 Hartree

Sum of electronic and thermal Free Energies = -16399.861576 Hartree

| Cartesian Coordinates |           |           |           | Cartesian Coordinates |           |           |           |
|-----------------------|-----------|-----------|-----------|-----------------------|-----------|-----------|-----------|
| Atoms                 | X         | Y         | Z         | Atoms                 | X         | Y         | Z         |
| C                     | 1.801330  | -0.242625 | -0.122759 | C                     | 1.742080  | -1.145515 | -1.205985 |
| C                     | 2.688921  | -2.159649 | -1.257246 | C                     | 3.707365  | -2.215782 | -0.284267 |
| C                     | 3.822948  | -1.247003 | 0.703889  | C                     | 2.874761  | -0.206699 | 0.789024  |
| C                     | 0.754629  | 0.723436  | -0.064095 | C                     | 0.953710  | 1.907616  | 0.673190  |
| C                     | 0.050081  | 2.964586  | 0.449906  | C                     | -0.991436 | 2.830547  | -0.464233 |
| C                     | -1.256818 | 1.593334  | -1.059084 | C                     | -0.435145 | 0.472113  | -0.821644 |
| Si                    | -1.531677 | -0.990298 | -0.214141 | C                     | -3.072812 | -1.129513 | -1.260831 |
| C                     | -0.616292 | -2.533207 | 0.297494  | Br                    | -2.303301 | -0.209112 | 1.786242  |
| B                     | 0.716616  | -0.737109 | -2.333117 | Br                    | 1.243577  | 0.740283  | -3.512671 |
| Br                    | -0.291496 | -2.156754 | -3.251059 | C                     | 2.961358  | 0.930229  | 1.675007  |
| C                     | 2.079931  | 1.964651  | 1.576523  | H                     | 2.675917  | -2.885840 | -2.073113 |
| H                     | 4.453722  | -3.009753 | -0.341516 | H                     | 4.660107  | -1.273209 | 1.404227  |
| H                     | 0.187202  | 3.907047  | 0.985196  | H                     | -1.655478 | 3.674379  | -0.653763 |
| H                     | -2.171117 | 1.481000  | -1.646954 | H                     | -3.660320 | -0.205586 | -1.168832 |
| H                     | -3.687688 | -1.951983 | -0.870068 | H                     | -2.848977 | -1.323451 | -2.317615 |
| H                     | 0.192563  | -2.261850 | 0.991181  | H                     | -0.199097 | -3.095716 | -0.545880 |
| H                     | -1.334951 | -3.164610 | 0.840259  | H                     | 3.788132  | 0.978495  | 2.386301  |
| H                     | 2.205069  | 2.856357  | 2.193642  | Br                    | -2.710569 | -4.769308 | -1.620439 |
| B                     | -3.799683 | -5.239724 | -0.134361 | Br                    | -4.541127 | -6.982447 | -0.006169 |
| Br                    | -4.145433 | -3.956759 | 1.230167  |                       |           |           |           |



TS-4\*[BBr<sub>3</sub>]

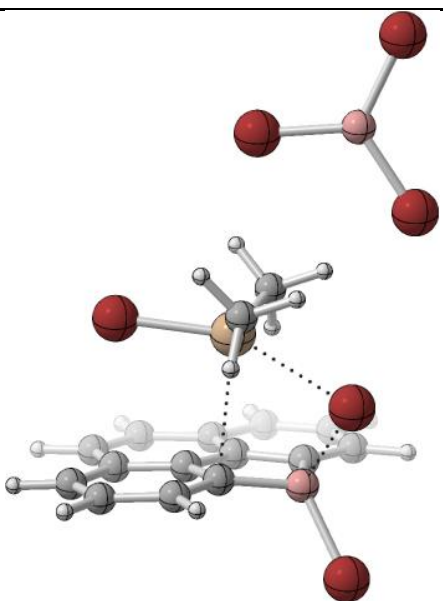

#p m062x/def2svp opt=(calcfc,ts,noeigen) freq  
empiricaldispersion=gd3 nosymm

Charge = 0, Multiplicity = 1, Point group = C1

Electronic Energy = -16400.043155 Hartree

Number of imaginary frequencies = 1,  $\nu_i = -127.94 \text{ cm}^{-1}$

Sum of electronic and zero-point Energies = -16399.778676 Hartree

Sum of electronic and thermal Energies = -16399.751368 Hartree

Sum of electronic and thermal Enthalpies = -16399.750424 Hartree

Sum of electronic and thermal Free Energies = -16399.843835 Hartree

| Cartesian Coordinates |           |           |           | Cartesian Coordinates |           |           |           |
|-----------------------|-----------|-----------|-----------|-----------------------|-----------|-----------|-----------|
| Atoms                 | X         | Y         | Z         | Atoms                 | X         | Y         | Z         |
| C                     | 3.175682  | 1.612481  | 0.365297  | C                     | 3.250049  | 0.864609  | -0.832316 |
| C                     | 4.261460  | -0.076153 | -0.909255 | C                     | 5.147407  | -0.243041 | 0.185666  |
| C                     | 5.057532  | 0.520031  | 1.341934  | C                     | 4.043820  | 1.500864  | 1.458235  |
| C                     | 2.094895  | 2.539852  | 0.374072  | C                     | 1.897208  | 3.437959  | 1.426136  |
| C                     | 0.824660  | 4.347806  | 1.263838  | C                     | 0.028783  | 4.310140  | 0.123331  |
| C                     | 0.249765  | 3.375150  | -0.910522 | C                     | 1.299425  | 2.460727  | -0.797323 |
| B                     | 2.088284  | 1.446280  | -1.791017 | Br                    | 2.700441  | 2.237869  | -3.511974 |
| C                     | 3.811129  | 2.403634  | 2.564874  | C                     | 2.803547  | 3.330532  | 2.546607  |
| H                     | 4.394211  | -0.688486 | -1.804346 | H                     | 5.937849  | -0.992244 | 0.111302  |
| H                     | 5.769818  | 0.368640  | 2.155655  | H                     | 0.615314  | 5.083220  | 2.044236  |
| H                     | -0.790869 | 5.023852  | 0.028201  | H                     | -0.373633 | 3.397831  | -1.809017 |
| H                     | 4.471962  | 2.346278  | 3.432639  | H                     | 2.672594  | 4.004084  | 3.395999  |
| Si                    | -0.440457 | 0.377319  | 0.101626  | C                     | -2.101813 | 0.312195  | -0.744239 |
| C                     | 0.676436  | -0.938590 | 0.796717  | Br                    | -0.929907 | 1.592241  | 1.940503  |
| H                     | -2.195433 | 1.215147  | -1.365648 | H                     | -2.903007 | 0.306910  | 0.005372  |
| H                     | -2.163892 | -0.566645 | -1.399696 | H                     | 1.708699  | -0.552413 | 0.793886  |
| H                     | 0.644686  | -1.833891 | 0.162493  | H                     | 0.380430  | -1.161058 | 1.829727  |
| Br                    | 0.631490  | -0.071366 | -2.259798 | Br                    | -1.237261 | -3.390017 | -1.513018 |
| B                     | -2.246590 | -3.842766 | 0.035580  | Br                    | -2.995909 | -5.572934 | 0.214481  |
| Br                    | -2.504494 | -2.549092 | 1.412214  |                       |           |           |           |

### Me<sub>2</sub>-DMDBS

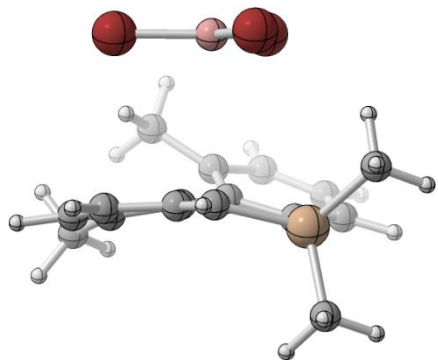

```
#p m062x/def2svp opt freq
empiricaldispersion=gd3 nosymm
```

Charge = 0, Multiplicity = 1, Point group = C1

Electronic Energy = -8655.844502 Hartree

Number of imaginary frequencies = 0

Sum of electronic and zero-point Energies = -8655.545304 Hartree

Sum of electronic and thermal Energies = -8655.521752 Hartree

Sum of electronic and thermal Enthalpies = -8655.520807 Hartree

Sum of electronic and thermal Free Energies = -8655.600214 Hartree

| Cartesian Coordinates |           |           |           | Cartesian Coordinates |           |           |           |
|-----------------------|-----------|-----------|-----------|-----------------------|-----------|-----------|-----------|
| Atoms                 | X         | Y         | Z         | Atoms                 | X         | Y         | Z         |
| C                     | -0.140785 | 2.587861  | -1.899023 | C                     | -0.037981 | 1.174238  | -1.981438 |
| C                     | 0.784175  | 0.577984  | -2.931851 | C                     | 1.540636  | 1.374689  | -3.794472 |
| C                     | 1.541147  | 2.752980  | -3.618396 | C                     | 0.742778  | 3.386602  | -2.652034 |
| C                     | -1.095438 | 3.064695  | -0.843420 | C                     | -1.346176 | 2.105203  | 0.175388  |
| Si                    | -0.837302 | 0.405479  | -0.462386 | C                     | -1.823343 | 4.272104  | -0.842384 |
| C                     | -2.606669 | 4.568069  | 0.284753  | C                     | -2.737154 | 3.687604  | 1.352661  |
| C                     | -2.145827 | 2.425849  | 1.269557  | C                     | -2.382702 | -0.613209 | -0.792773 |
| C                     | 0.379643  | -0.607188 | 0.547183  | C                     | 1.015081  | 4.843867  | -2.366480 |
| C                     | -1.922989 | 5.202245  | -2.026617 | H                     | 0.863880  | -0.510779 | -2.989820 |
| H                     | 2.178381  | 0.920414  | -4.554538 | H                     | 2.217460  | 3.369496  | -4.216138 |
| H                     | -3.155516 | 5.513341  | 0.299529  | H                     | -3.347698 | 3.959546  | 2.215146  |
| H                     | -2.329437 | 1.687164  | 2.054559  | H                     | -2.876094 | -0.887020 | 0.152244  |
| H                     | -2.133814 | -1.542099 | -1.327446 | H                     | -3.096086 | -0.040695 | -1.401715 |
| H                     | 0.620085  | -1.539012 | 0.011910  | H                     | 1.314303  | -0.058344 | 0.725553  |
| H                     | -0.054744 | -0.880770 | 1.520774  | H                     | 0.658051  | 5.130518  | -1.368669 |
| H                     | 0.558851  | 5.517300  | -3.106075 | H                     | 2.100832  | 5.014639  | -2.393673 |
| H                     | -1.348430 | 6.128478  | -1.883127 | H                     | -2.974431 | 5.489096  | -2.169302 |
| H                     | -1.574665 | 4.721004  | -2.948190 | Br                    | 0.988326  | 1.957264  | 3.212660  |
| B                     | 1.336766  | 3.190229  | 1.800857  | Br                    | 0.640327  | 4.954438  | 1.888859  |
| Br                    | 2.464768  | 2.681731  | 0.356185  |                       |           |           |           |

**IM-1\*\***

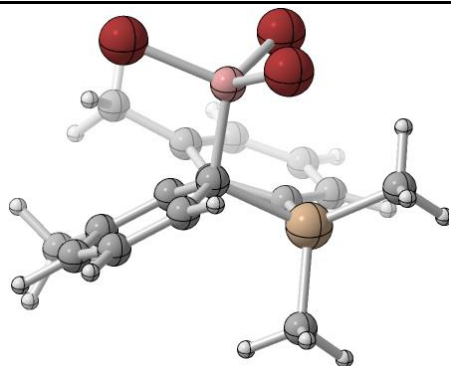

```
#p m062x/def2svp opt freq
empiricaldispersion=gd3 nosymm
Charge = 0, Multiplicity = 1, Point group = C1
Electronic Energy = -8655.833241 Hartree
Number of imaginary frequencies = 0
Sum of electronic and zero-point Energies = -8655.533860 Hartree
Sum of electronic and thermal Energies = -8655.510725 Hartree
Sum of electronic and thermal Enthalpies = -8655.509781 Hartree
Sum of electronic and thermal Free Energies = -8655.586059 Hartree
```

| Cartesian Coordinates |           |           |           | Cartesian Coordinates |           |           |           |
|-----------------------|-----------|-----------|-----------|-----------------------|-----------|-----------|-----------|
| Atoms                 | X         | Y         | Z         | Atoms                 | X         | Y         | Z         |
| C                     | 0.100838  | 2.582317  | -1.718855 | C                     | 0.342264  | 1.191098  | -1.675599 |
| C                     | 1.222567  | 0.609128  | -2.583885 | C                     | 1.868850  | 1.416923  | -3.519715 |
| C                     | 1.690571  | 2.799295  | -3.494705 | C                     | 0.825149  | 3.418736  | -2.585911 |
| C                     | -0.889714 | 3.005392  | -0.702647 | C                     | -0.770874 | 2.314781  | 0.571589  |
| Si                    | -0.452293 | 0.478581  | -0.134001 | C                     | -1.995875 | 3.823699  | -0.986505 |
| C                     | -2.996807 | 3.921045  | -0.011064 | C                     | -2.966658 | 3.215756  | 1.196548  |
| C                     | -1.879599 | 2.416970  | 1.473443  | C                     | -2.164102 | -0.229135 | -0.434664 |
| C                     | 0.603910  | -0.709277 | 0.832817  | C                     | 0.821351  | 4.920343  | -2.463188 |
| C                     | -2.216979 | 4.508057  | -2.309877 | H                     | 1.429682  | -0.462918 | -2.554146 |
| H                     | 2.557157  | 0.975166  | -4.242124 | H                     | 2.274610  | 3.426991  | -4.171882 |
| H                     | -3.867843 | 4.543869  | -0.233457 | H                     | -3.790777 | 3.305002  | 1.904063  |
| H                     | -1.820993 | 1.888741  | 2.426911  | H                     | -2.648479 | -0.497720 | 0.516029  |
| H                     | -2.095844 | -1.137952 | -1.051380 | H                     | -2.800654 | 0.497866  | -0.959596 |
| H                     | 0.724359  | -1.619749 | 0.222877  | H                     | 1.591756  | -0.283769 | 1.049969  |
| H                     | 0.123342  | -0.986811 | 1.780918  | H                     | 1.858203  | 5.284380  | -2.462831 |
| H                     | 0.361944  | 5.245804  | -1.520379 | H                     | 0.300293  | 5.403359  | -3.303127 |
| H                     | -3.289278 | 4.540463  | -2.543852 | H                     | -1.698711 | 3.985371  | -3.123285 |
| H                     | -1.850589 | 5.544330  | -2.287773 | Br                    | 0.711375  | 1.785582  | 3.237731  |
| B                     | 0.672211  | 2.807924  | 1.494145  | Br                    | 0.406599  | 4.786377  | 1.825294  |
| Br                    | 2.404618  | 2.519753  | 0.525523  |                       |           |           |           |

**IM-2\*\***

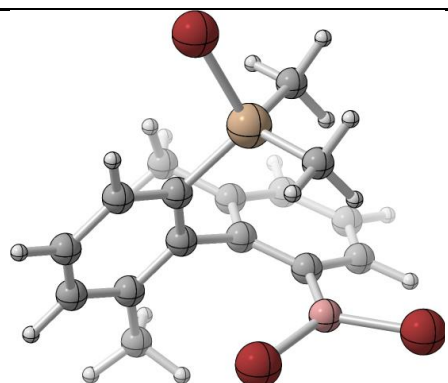

#p m062x/def2svp opt freq empiricaldispersion=gd3  
nosymm

Charge = 0, Multiplicity = 1, Point group = C1

Electronic Energy = -8655.879948 Hartree

Number of imaginary frequencies = 0

Sum of electronic and zero-point Energies = -8655.579606 Hartree

Sum of electronic and thermal Energies = -8655.556187 Hartree

Sum of electronic and thermal Enthalpies = -8655.555243 Hartree

Sum of electronic and thermal Free Energies = -8655.634252 Hartree

| Cartesian Coordinates |           |           |           | Cartesian Coordinates |           |           |           |
|-----------------------|-----------|-----------|-----------|-----------------------|-----------|-----------|-----------|
| Atoms                 | X         | Y         | Z         | Atoms                 | X         | Y         | Z         |
| C                     | 2.582845  | 1.655355  | 0.244291  | C                     | 2.535349  | 0.889106  | -0.949529 |
| C                     | 3.161694  | -0.376582 | -0.947229 | C                     | 3.830554  | -0.854633 | 0.170478  |
| C                     | 3.873442  | -0.082503 | 1.328517  | C                     | 3.250472  | 1.166010  | 1.386423  |
| C                     | 1.894346  | 2.976493  | 0.387742  | C                     | 2.656660  | 4.149832  | 0.226521  |
| C                     | 2.022528  | 5.384332  | 0.366737  | C                     | 0.663255  | 5.461345  | 0.661857  |
| C                     | -0.076468 | 4.296519  | 0.834263  | C                     | 0.524620  | 3.033346  | 0.707849  |
| Si                    | -0.559295 | 1.486557  | 0.855119  | C                     | -1.331745 | 1.042516  | -0.790888 |
| C                     | 0.207121  | -0.015546 | 1.666809  | Br                    | -2.287977 | 2.063630  | 2.208011  |
| B                     | 1.865762  | 1.347669  | -2.285939 | Br                    | 1.491118  | 3.156108  | -2.779082 |
| Br                    | 1.404775  | 0.038445  | -3.629593 | C                     | 3.259652  | 1.955182  | 2.670533  |
| C                     | 4.109116  | 4.072361  | -0.164447 | H                     | 3.128947  | -0.991475 | -1.846313 |
| H                     | 4.314468  | -1.831617 | 0.142573  | H                     | 4.386758  | -0.460828 | 2.215387  |
| H                     | 2.603573  | 6.299072  | 0.229804  | H                     | 0.180005  | 6.434240  | 0.763289  |
| H                     | -1.137063 | 4.369342  | 1.082094  | H                     | -1.698655 | 1.942506  | -1.304471 |
| H                     | -2.176978 | 0.357447  | -0.632187 | H                     | -0.605927 | 0.536376  | -1.445689 |
| H                     | 0.691999  | 0.239287  | 2.619697  | H                     | 0.946323  | -0.497002 | 1.009321  |
| H                     | -0.599449 | -0.733972 | 1.875523  | H                     | 3.719180  | 2.944896  | 2.533771  |
| H                     | 3.810901  | 1.419888  | 3.453938  | H                     | 2.234595  | 2.140040  | 3.025591  |
| H                     | 4.561023  | 5.071872  | -0.198302 | H                     | 4.212183  | 3.614466  | -1.161020 |
| H                     | 4.690831  | 3.450352  | 0.531773  |                       |           |           |           |

### Me<sub>2</sub>-Br-DBB

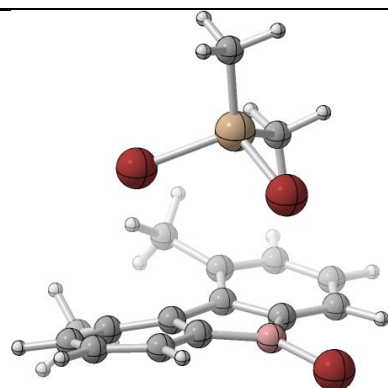

#p m062x/def2svp opt freq empiricaldispersion=gd3  
nosymm

Charge = 0, Multiplicity = 1, Point group = C1

Electronic Energy = -8655.881008 Hartree

Number of imaginary frequencies = 0

Sum of electronic and zero-point Energies = -8655.580744 Hartree

Sum of electronic and thermal Energies = -8655.556972 Hartree

Sum of electronic and thermal Enthalpies = -8655.556028 Hartree

Sum of electronic and thermal Free Energies = -8655.637168 Hartree

| Cartesian Coordinates |           |           |           | Cartesian Coordinates |           |           |           |
|-----------------------|-----------|-----------|-----------|-----------------------|-----------|-----------|-----------|
| Atoms                 | X         | Y         | Z         | Atoms                 | X         | Y         | Z         |
| C                     | 2.993416  | 2.353046  | 0.936221  | C                     | 3.267656  | 1.764804  | -0.331960 |
| C                     | 3.956856  | 0.566757  | -0.443439 | C                     | 4.369006  | -0.089131 | 0.723123  |
| C                     | 4.000078  | 0.427394  | 1.958033  | C                     | 3.271058  | 1.628373  | 2.103162  |
| C                     | 2.277840  | 3.664048  | 0.737233  | C                     | 2.100855  | 4.751740  | 1.599992  |
| C                     | 1.270290  | 5.799245  | 1.149985  | C                     | 0.706234  | 5.824352  | -0.119061 |
| C                     | 1.033861  | 4.816666  | -1.032295 | C                     | 1.825114  | 3.759799  | -0.608786 |
| B                     | 2.522664  | 2.620624  | -1.396640 | Br                    | 2.585527  | 2.398956  | -3.294443 |
| C                     | 2.728636  | 1.958516  | 3.471394  | C                     | 2.821256  | 4.936925  | 2.912177  |
| H                     | 4.153957  | 0.140121  | -1.429719 | H                     | 4.926307  | -1.025316 | 0.668601  |
| H                     | 4.244958  | -0.134526 | 2.863174  | H                     | 1.093539  | 6.639475  | 1.826683  |
| H                     | 0.065959  | 6.656795  | -0.413920 | H                     | 0.688777  | 4.859994  | -2.067936 |
| H                     | 3.441300  | 2.517482  | 4.094125  | H                     | 2.494909  | 1.024435  | 4.001657  |
| H                     | 1.802742  | 2.541216  | 3.393508  | H                     | 2.205905  | 4.661774  | 3.780665  |
| H                     | 3.095627  | 5.994672  | 3.027319  | H                     | 3.743833  | 4.345390  | 2.943104  |
| Si                    | -0.846205 | 0.561289  | 0.633434  | C                     | -2.557389 | -0.151575 | 0.795039  |
| C                     | 0.522467  | -0.540926 | 1.234797  | Br                    | -0.804290 | 2.500275  | 1.752362  |
| Br                    | -0.476470 | 1.002211  | -1.530513 | H                     | -3.302906 | 0.558430  | 0.412361  |
| H                     | -2.778998 | -0.360117 | 1.851951  | H                     | -2.631530 | -1.086526 | 0.220633  |
| H                     | 1.500244  | -0.105749 | 0.983050  | H                     | 0.440303  | -1.523820 | 0.747217  |
| H                     | 0.458593  | -0.672978 | 2.325082  |                       |           |           |           |

**TS-1\*\***

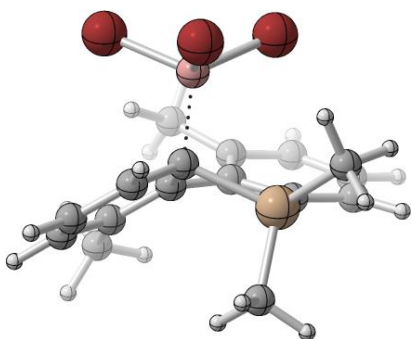

#p m062x/def2svp opt=(calcfc,ts,noeigen) freq  
empiricaldispersion=gd3 nosymm

Charge = 0, Multiplicity = 1, Point group = C1

Electronic Energy = -8655.830956 Hartree

Number of imaginary frequencies = 1,  $\nu_i = -129.55 \text{ cm}^{-1}$

Sum of electronic and zero-point Energies = -8655.531807 Hartree

Sum of electronic and thermal Energies = -8655.509342 Hartree

Sum of electronic and thermal Enthalpies = -8655.508397 Hartree

Sum of electronic and thermal Free Energies = -8655.583385 Hartree

| Cartesian Coordinates |           |           |           | Cartesian Coordinates |           |           |           |
|-----------------------|-----------|-----------|-----------|-----------------------|-----------|-----------|-----------|
| Atoms                 | X         | Y         | Z         | Atoms                 | X         | Y         | Z         |
| C                     | 0.009216  | 2.565110  | -1.757627 | C                     | 0.208781  | 1.167421  | -1.744425 |
| C                     | 1.058635  | 0.576576  | -2.675744 | C                     | 1.719323  | 1.382667  | -3.602581 |
| C                     | 1.584586  | 2.769203  | -3.547429 | C                     | 0.747647  | 3.396814  | -2.617767 |
| C                     | -0.961224 | 2.993138  | -0.725193 | C                     | -0.846206 | 2.281309  | 0.538886  |
| Si                    | -0.577074 | 0.443991  | -0.202951 | C                     | -2.048037 | 3.843816  | -0.987529 |
| C                     | -3.033184 | 3.959555  | 0.001168  | C                     | -3.007937 | 3.239749  | 1.200539  |
| C                     | -1.942900 | 2.404275  | 1.453375  | C                     | -2.313503 | -0.209760 | -0.482766 |
| C                     | 0.484073  | -0.785315 | 0.718595  | C                     | 0.781479  | 4.896326  | -2.476167 |
| C                     | -2.264283 | 4.550234  | -2.300102 | H                     | 1.231624  | -0.502098 | -2.670292 |
| H                     | 2.384561  | 0.934703  | -4.342562 | H                     | 2.179322  | 3.392228  | -4.219573 |
| H                     | -3.888432 | 4.609948  | -0.202936 | H                     | -3.820814 | 3.343452  | 1.919023  |
| H                     | -1.894032 | 1.859530  | 2.397565  | H                     | -2.785705 | -0.479758 | 0.473793  |
| H                     | -2.278988 | -1.112334 | -1.111611 | H                     | -2.940848 | 0.540372  | -0.985486 |
| H                     | 1.361586  | -1.032021 | 0.103301  | H                     | 0.854578  | -0.370029 | 1.665384  |
| H                     | -0.083720 | -1.702825 | 0.927495  | H                     | 1.826544  | 5.236058  | -2.482582 |
| H                     | 0.339576  | 5.220913  | -1.524908 | H                     | 0.263783  | 5.400638  | -3.305679 |
| H                     | -3.337572 | 4.610708  | -2.523888 | H                     | -1.765613 | 4.026467  | -3.124931 |
| H                     | -1.873439 | 5.577273  | -2.267790 | Br                    | 0.609286  | 1.854441  | 3.257907  |
| B                     | 0.623774  | 2.739270  | 1.436602  | Br                    | 0.488985  | 4.748507  | 1.642539  |
| Br                    | 2.328914  | 2.258624  | 0.497989  |                       |           |           |           |

TS-2\*\*

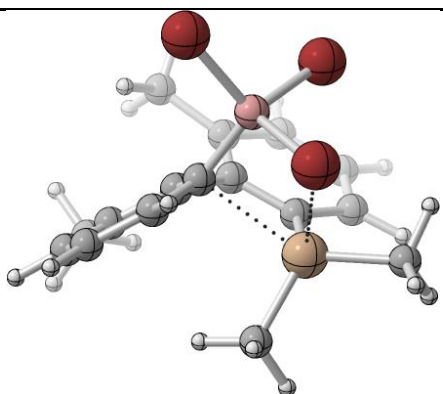

#p m062x/def2svp opt=(calcfc,ts,noeigen) freq  
empiricaldispersion=gd3 nosymm

Charge = 0, Multiplicity = 1, Point group = C1

Electronic Energy = -8655.814855 Hartree

Number of imaginary frequencies = 1,  $\nu_i = -142.90 \text{ cm}^{-1}$

Sum of electronic and zero-point Energies = -8655.515671 Hartree

Sum of electronic and thermal Energies = -8655.493082 Hartree

Sum of electronic and thermal Enthalpies = -8655.492138 Hartree

Sum of electronic and thermal Free Energies = -8655.567129 Hartree

| Cartesian Coordinates |           |           |           | Cartesian Coordinates |           |           |           |
|-----------------------|-----------|-----------|-----------|-----------------------|-----------|-----------|-----------|
| Atoms                 | X         | Y         | Z         | Atoms                 | X         | Y         | Z         |
| C                     | 0.648004  | -1.451651 | -0.361493 | C                     | 0.313774  | -2.349218 | 0.668649  |
| C                     | 0.969799  | -3.579860 | 0.765957  | C                     | 1.937656  | -3.913177 | -0.177265 |
| C                     | 2.288699  | -2.997853 | -1.169222 | C                     | 1.665324  | -1.750573 | -1.280273 |
| C                     | -0.157087 | -0.208216 | -0.317983 | C                     | -0.272785 | 0.447292  | 0.945973  |
| Si                    | -0.812701 | -1.663796 | 1.988264  | C                     | -1.005465 | 0.124202  | -1.400453 |
| C                     | -1.985281 | 1.097077  | -1.199486 | C                     | -2.157677 | 1.724536  | 0.036997  |
| C                     | -1.321308 | 1.399092  | 1.085386  | C                     | -2.635201 | -1.460277 | 1.669915  |
| C                     | -0.486940 | -2.610010 | 3.561765  | Br                    | -0.038716 | 0.538927  | 3.911868  |
| B                     | 0.940480  | 0.723414  | 2.053868  | Br                    | 1.569046  | 2.621723  | 1.832274  |
| Br                    | 2.537947  | -0.490204 | 2.091584  | C                     | 2.164118  | -0.749284 | -2.288555 |
| C                     | -0.950395 | -0.581090 | -2.732185 | H                     | 0.745588  | -4.272065 | 1.579853  |
| H                     | 2.449394  | -4.874966 | -0.121260 | H                     | 3.096831  | -3.243253 | -1.862567 |
| H                     | -2.661430 | 1.337222  | -2.023740 | H                     | -2.944338 | 2.467988  | 0.169816  |
| H                     | -1.433830 | 1.916950  | 2.038826  | H                     | -3.065737 | -0.781905 | 2.420262  |
| H                     | -3.113896 | -2.446672 | 1.776408  | H                     | -2.832846 | -1.060686 | 0.666676  |
| H                     | -0.721734 | -3.668363 | 3.350353  | H                     | 0.569014  | -2.525777 | 3.851174  |
| H                     | -1.118993 | -2.258866 | 4.386042  | H                     | 1.921687  | -1.057496 | -3.316677 |
| H                     | 3.257582  | -0.664280 | -2.217593 | H                     | 1.740334  | 0.247762  | -2.112412 |
| H                     | -1.939946 | -0.573580 | -3.207398 | H                     | -0.620670 | -1.623127 | -2.630849 |
| H                     | -0.253242 | -0.077592 | -3.418058 |                       |           |           |           |

TS-4\*\*

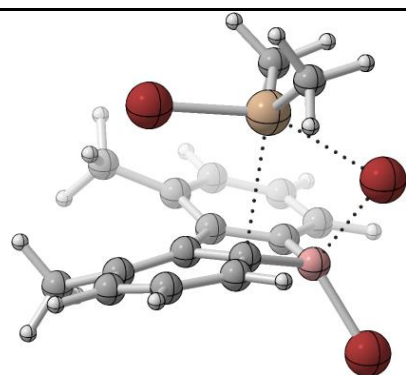

#p m062x/def2svp opt=(calcfc,ts,noeigen) freq  
empiricaldispersion=gd3 nosymm

Charge = 0, Multiplicity = 1, Point group = C1

Electronic Energy = -8655.827213 Hartree

Number of imaginary frequencies = 1,  $\nu_i = -142.87 \text{ cm}^{-1}$

Sum of electronic and zero-point Energies = -8655.527201 Hartree

Sum of electronic and thermal Energies = -8655.504641 Hartree

Sum of electronic and thermal Enthalpies = -8655.503697 Hartree

Sum of electronic and thermal Free Energies = -8655.579457 Hartree

| Cartesian Coordinates |           |           |           | Cartesian Coordinates |           |           |           |
|-----------------------|-----------|-----------|-----------|-----------------------|-----------|-----------|-----------|
| Atoms                 | X         | Y         | Z         | Atoms                 | X         | Y         | Z         |
| C                     | 3.167274  | 1.689352  | 0.521874  | C                     | 3.275847  | 1.100989  | -0.765266 |
| C                     | 4.196299  | 0.089294  | -1.003977 | C                     | 4.979994  | -0.384032 | 0.051353  |
| C                     | 4.781799  | 0.111428  | 1.337496  | C                     | 3.859122  | 1.134053  | 1.614573  |
| C                     | 2.119124  | 2.754233  | 0.502201  | C                     | 1.922445  | 3.869822  | 1.327841  |
| C                     | 0.778583  | 4.654947  | 1.087176  | C                     | -0.105300 | 4.417711  | 0.036838  |
| C                     | 0.189884  | 3.410775  | -0.879480 | C                     | 1.301579  | 2.590833  | -0.656329 |
| B                     | 2.129477  | 1.694210  | -1.689124 | Br                    | 2.636891  | 2.548596  | -3.405859 |
| C                     | 3.559428  | 1.456793  | 3.057637  | C                     | 2.904354  | 4.341773  | 2.368511  |
| H                     | 4.281302  | -0.348299 | -2.001486 | H                     | 5.708825  | -1.179119 | -0.114987 |
| H                     | 5.331949  | -0.330905 | 2.171641  | H                     | 0.597498  | 5.508680  | 1.745718  |
| H                     | -0.975998 | 5.060680  | -0.097248 | H                     | -0.400389 | 3.285786  | -1.792111 |
| H                     | 3.669801  | 0.547501  | 3.664452  | H                     | 2.528800  | 1.817425  | 3.173621  |
| H                     | 4.237799  | 2.212843  | 3.477676  | H                     | 2.951699  | 5.439335  | 2.352652  |
| H                     | 3.909837  | 3.955193  | 2.163623  | H                     | 2.618816  | 4.038725  | 3.386050  |
| Si                    | -0.228450 | 0.426662  | 0.191985  | C                     | -1.963952 | 0.203693  | -0.453018 |
| C                     | 0.843490  | -0.964383 | 0.810624  | Br                    | -0.625100 | 1.626404  | 2.080759  |
| H                     | -2.273136 | 1.119156  | -0.977902 | H                     | -2.648447 | 0.036139  | 0.389268  |
| H                     | -2.001541 | -0.633281 | -1.163098 | H                     | 1.904497  | -0.671607 | 0.780049  |
| H                     | 0.709894  | -1.831820 | 0.149253  | H                     | 0.567067  | -1.207919 | 1.845103  |
| Br                    | 0.690390  | 0.105604  | -2.180799 |                       |           |           |           |



### Me<sub>2</sub>-Br-DBB[BBr<sub>3</sub>]

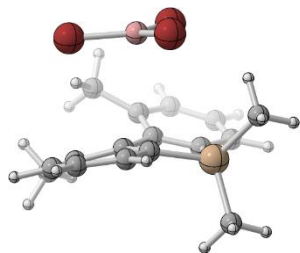

#p m062x/def2svp opt freq  
empiricaldispersion=gd3 nosymm

Charge = 0, Multiplicity = 1, Point group = C1

Electronic Energy = -16402.438960 Hartree

Number of imaginary frequencies = 0

Sum of electronic and zero-point Energies = -16402.133228 Hartree

Sum of electronic and thermal Energies = -16402.103244 Hartree

Sum of electronic and thermal Enthalpies = -16402.102300 Hartree

Sum of electronic and thermal Free Energies = -16402.202009  
Hartree

| Cartesian Coordinates |           |           |           | Cartesian Coordinates |           |           |           |
|-----------------------|-----------|-----------|-----------|-----------------------|-----------|-----------|-----------|
| Atoms                 | X         | Y         | Z         | Atoms                 | X         | Y         | Z         |
| C                     | -0.139710 | 2.581646  | -1.901489 | C                     | -0.032664 | 1.167950  | -1.982834 |
| C                     | 0.799296  | 0.575991  | -2.927380 | C                     | 1.556650  | 1.374559  | -3.787334 |
| C                     | 1.548361  | 2.753088  | -3.614816 | C                     | 0.742856  | 3.383560  | -2.652456 |
| C                     | -1.093851 | 3.057038  | -0.845226 | C                     | -1.337370 | 2.098424  | 0.175845  |
| Si                    | -0.837236 | 0.395888  | -0.466424 | C                     | -1.825601 | 4.262053  | -0.844359 |
| C                     | -2.605807 | 4.558058  | 0.284913  | C                     | -2.729439 | 3.679084  | 1.354878  |
| C                     | -2.134553 | 2.418912  | 1.271883  | C                     | -2.409665 | -0.583316 | -0.788405 |
| C                     | 0.385968  | -0.610275 | 0.542297  | C                     | 1.007473  | 4.842453  | -2.367725 |
| C                     | -1.932459 | 5.188857  | -2.030610 | H                     | 0.888095  | -0.512057 | -2.979565 |
| H                     | 2.201766  | 0.921519  | -4.541863 | H                     | 2.224145  | 3.372148  | -4.210524 |
| H                     | -3.157616 | 5.501614  | 0.299742  | H                     | -3.337584 | 3.950704  | 2.219194  |
| H                     | -2.313844 | 1.680896  | 2.058568  | H                     | -2.893111 | -0.859834 | 0.161454  |
| H                     | -2.200029 | -1.508259 | -1.345150 | H                     | -3.115095 | 0.026557  | -1.370589 |
| H                     | 0.659488  | -1.522190 | -0.011017 | H                     | 1.302572  | -0.038575 | 0.742651  |
| H                     | -0.053534 | -0.916913 | 1.503855  | H                     | 0.648399  | 5.127882  | -1.370253 |
| H                     | 0.548033  | 5.512995  | -3.107994 | H                     | 2.092304  | 5.018995  | -2.394591 |
| H                     | -1.363144 | 6.118783  | -1.890002 | H                     | -2.985792 | 5.469192  | -2.172484 |
| H                     | -1.582610 | 4.707577  | -2.951592 | Br                    | 0.998819  | 1.961058  | 3.210612  |
| B                     | 1.342237  | 3.191609  | 1.795289  | Br                    | 0.643149  | 4.954921  | 1.881180  |
| Br                    | 2.469292  | 2.682405  | 0.350183  | Br                    | -0.025488 | -3.341024 | -2.435056 |
| B                     | -0.305156 | -4.546329 | -0.986903 | Br                    | 0.434611  | -6.292126 | -1.057399 |
| Br                    | -1.326635 | -3.998119 | 0.517114  |                       |           |           |           |

IM-1\*\*[BBr<sub>3</sub>]

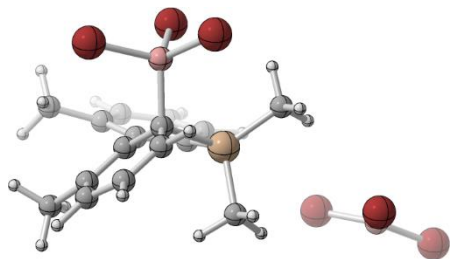

```
#p m062x/def2svp opt freq
empiricaldispersion=gd3 nosymm
Charge = 0, Multiplicity = 1, Point group = C1
Electronic Energy = -16402.428873 Hartree
Number of imaginary frequencies = 0
Sum of electronic and zero-point Energies = -16402.122618 Hartree
Sum of electronic and thermal Energies = -16402.092288 Hartree
Sum of electronic and thermal Enthalpies = -16402.091344 Hartree
Sum of electronic and thermal Free Energies = -16402.190909 Hartree
```

| Cartesian Coordinates |           |           |           | Cartesian Coordinates |           |           |           |
|-----------------------|-----------|-----------|-----------|-----------------------|-----------|-----------|-----------|
| Atoms                 | X         | Y         | Z         | Atoms                 | X         | Y         | Z         |
| C                     | 0.103254  | 2.576942  | -1.724642 | C                     | 0.350691  | 1.186652  | -1.680997 |
| C                     | 1.260133  | 0.617016  | -2.568934 | C                     | 1.914576  | 1.431169  | -3.493141 |
| C                     | 1.714786  | 2.810557  | -3.478339 | C                     | 0.828305  | 3.420467  | -2.583839 |
| C                     | -0.885911 | 2.996467  | -0.705639 | C                     | -0.748163 | 2.319749  | 0.573440  |
| Si                    | -0.465370 | 0.469374  | -0.151252 | C                     | -2.004904 | 3.795762  | -0.991926 |
| C                     | -3.002999 | 3.887764  | -0.013118 | C                     | -2.954219 | 3.195750  | 1.201240  |
| C                     | -1.851932 | 2.418397  | 1.481217  | C                     | -2.213180 | -0.155990 | -0.428376 |
| C                     | 0.583159  | -0.720844 | 0.819910  | C                     | 0.801093  | 4.922273  | -2.466682 |
| C                     | -2.238402 | 4.465384  | -2.320648 | H                     | 1.490589  | -0.449680 | -2.525365 |
| H                     | 2.626209  | 0.996949  | -4.197255 | H                     | 2.301245  | 3.444095  | -4.147929 |
| H                     | -3.885027 | 4.494197  | -0.237497 | H                     | -3.775384 | 3.279387  | 1.912933  |
| H                     | -1.778976 | 1.903672  | 2.441002  | H                     | -2.678654 | -0.431024 | 0.530356  |
| H                     | -2.214397 | -1.043738 | -1.076560 | H                     | -2.825376 | 0.625008  | -0.903594 |
| H                     | 0.732068  | -1.615969 | 0.193980  | H                     | 1.558443  | -0.279321 | 1.061873  |
| H                     | 0.088390  | -1.025092 | 1.752590  | H                     | 1.831532  | 5.303850  | -2.469445 |
| H                     | 0.337095  | 5.243957  | -1.524774 | H                     | 0.270592  | 5.392964  | -3.307811 |
| H                     | -3.311191 | 4.478940  | -2.554362 | H                     | -1.711928 | 3.944818  | -3.130175 |
| H                     | -1.888527 | 5.507554  | -2.306637 | Br                    | 0.749077  | 1.774206  | 3.223949  |
| B                     | 0.701892  | 2.790302  | 1.474433  | Br                    | 0.456687  | 4.774868  | 1.804851  |
| Br                    | 2.430307  | 2.488925  | 0.500574  | Br                    | -0.308641 | -2.788357 | -2.552873 |
| B                     | -0.862089 | -4.214325 | -1.413687 | Br                    | -0.740210 | -6.006297 | -2.017334 |
| Br                    | -1.537242 | -3.826529 | 0.318945  |                       |           |           |           |

**IM-2\*\*[BBr<sub>3</sub>]**

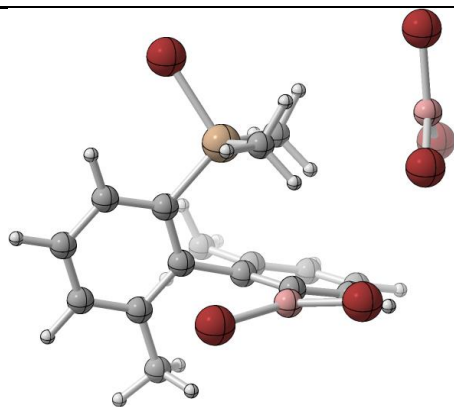

```
#p m062x/def2svp opt freq
empiricaldispersion=gd3 nosymm
```

Charge = 0, Multiplicity = 1, Point group = C1

Electronic Energy = -16402.480013 Hartree

Number of imaginary frequencies = 0

Sum of electronic and zero-point Energies = -16402.172949 Hartree

Sum of electronic and thermal Energies = -16402.142337 Hartree

Sum of electronic and thermal Enthalpies = -16402.141393 Hartree

Sum of electronic and thermal Free Energies = -16402.241687 Hartree

| Cartesian Coordinates |           |           |           | Cartesian Coordinates |           |           |           |
|-----------------------|-----------|-----------|-----------|-----------------------|-----------|-----------|-----------|
| Atoms                 | X         | Y         | Z         | Atoms                 | X         | Y         | Z         |
| C                     | 2.580044  | 1.657105  | 0.237611  | C                     | 2.532897  | 0.895554  | -0.959986 |
| C                     | 3.151395  | -0.374029 | -0.959603 | C                     | 3.806092  | -0.864152 | 0.161323  |
| C                     | 3.849912  | -0.095941 | 1.321895  | C                     | 3.241361  | 1.159992  | 1.379822  |
| C                     | 1.894193  | 2.979385  | 0.384125  | C                     | 2.657622  | 4.152261  | 0.227194  |
| C                     | 2.023898  | 5.387015  | 0.368583  | C                     | 0.664025  | 5.464558  | 0.660416  |
| C                     | -0.077089 | 4.299914  | 0.829381  | C                     | 0.523577  | 3.036901  | 0.701925  |
| Si                    | -0.554888 | 1.487475  | 0.854575  | C                     | -1.318050 | 1.014960  | -0.786726 |
| C                     | 0.222738  | 0.007637  | 1.698160  | Br                    | -2.298380 | 2.062919  | 2.187863  |
| B                     | 1.873464  | 1.364343  | -2.296545 | Br                    | 1.488172  | 3.173157  | -2.778438 |
| Br                    | 1.432825  | 0.067291  | -3.663169 | C                     | 3.255372  | 1.946729  | 2.665457  |
| C                     | 4.110665  | 4.074364  | -0.161439 | H                     | 3.121037  | -0.985025 | -1.861501 |
| H                     | 4.275871  | -1.847960 | 0.133329  | H                     | 4.352347  | -0.483283 | 2.211234  |
| H                     | 2.605967  | 6.301614  | 0.235052  | H                     | 0.181359  | 6.437674  | 0.762421  |
| H                     | -1.138051 | 4.372840  | 1.075586  | H                     | -1.762360 | 1.895779  | -1.272080 |
| H                     | -2.104695 | 0.262368  | -0.628508 | H                     | -0.570456 | 0.579035  | -1.466953 |
| H                     | 0.690557  | 0.280352  | 2.654925  | H                     | 0.982131  | -0.464242 | 1.056511  |
| H                     | -0.579692 | -0.716802 | 1.908379  | H                     | 3.731194  | 2.929358  | 2.532886  |
| H                     | 3.794556  | 1.401829  | 3.450655  | H                     | 2.231760  | 2.147138  | 3.016010  |
| H                     | 4.564720  | 5.073113  | -0.188314 | H                     | 4.214688  | 3.622469  | -1.160668 |
| H                     | 4.689766  | 3.446737  | 0.531850  | Br                    | 0.259977  | -2.468697 | -1.236395 |
| B                     | 0.069477  | -3.211536 | 0.501804  | Br                    | 1.613466  | -3.608281 | 1.539329  |
| Br                    | -1.662537 | -3.557437 | 1.204559  |                       |           |           |           |

**IM-3\*\*[BBr<sub>3</sub>]**

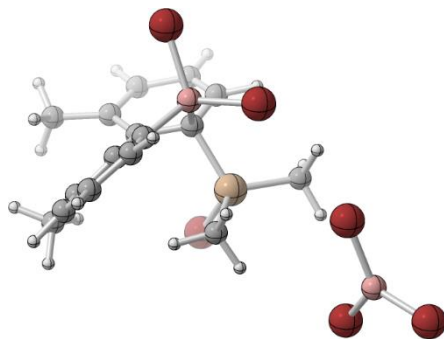

#p m062x/def2svp opt freq empiricaldispersion=gd3 nosymm

Charge = 0, Multiplicity = 1, Point group = C1

Electronic Energy = -16402.456788 Hartree

Number of imaginary frequencies = 0

Sum of electronic and zero-point Energies = -16402.149370 Hartree

Sum of electronic and thermal Energies = -16402.119231 Hartree

Sum of electronic and thermal Enthalpies = -16402.118286 Hartree

Sum of electronic and thermal Free Energies = -16402.217877 Hartree

| Cartesian Coordinates |           |           |           | Cartesian Coordinates |           |           |           |
|-----------------------|-----------|-----------|-----------|-----------------------|-----------|-----------|-----------|
| Atoms                 | X         | Y         | Z         | Atoms                 | X         | Y         | Z         |
| C                     | 3.071026  | 1.784412  | 0.725151  | C                     | 3.039844  | 1.073779  | -0.495317 |
| C                     | 3.891105  | -0.010687 | -0.684317 | C                     | 4.750563  | -0.383327 | 0.349247  |
| C                     | 4.725015  | 0.287171  | 1.574670  | C                     | 3.879722  | 1.379434  | 1.802311  |
| C                     | 2.070637  | 2.866114  | 0.658645  | C                     | 2.249910  | 4.204077  | 1.046492  |
| C                     | 1.271159  | 5.118711  | 0.645628  | C                     | 0.160246  | 4.780787  | -0.144719 |
| C                     | 0.009127  | 3.478322  | -0.557150 | C                     | 0.938645  | 2.469599  | -0.152100 |
| Si                    | -0.076602 | 1.030290  | 0.695357  | C                     | -1.768381 | 0.889850  | -0.077827 |
| C                     | 0.831982  | -0.566849 | 0.992246  | Br                    | -0.455205 | 1.874822  | 2.777359  |
| B                     | 1.911768  | 1.668948  | -1.448316 | Br                    | 2.594436  | 3.150656  | -2.636987 |
| Br                    | 0.875070  | 0.323320  | -2.538376 | C                     | 3.777508  | 1.977108  | 3.182372  |
| C                     | 3.489348  | 4.706702  | 1.736091  | H                     | 3.865824  | -0.569883 | -1.622038 |
| H                     | 5.426824  | -1.230055 | 0.218448  | H                     | 5.355349  | -0.068399 | 2.393080  |
| H                     | 1.413323  | 6.168478  | 0.917228  | H                     | -0.542962 | 5.554558  | -0.452126 |
| H                     | -0.822307 | 3.197252  | -1.208593 | H                     | -2.348065 | 1.804561  | 0.107620  |
| H                     | -2.293890 | 0.048153  | 0.397810  | H                     | -1.701489 | 0.699339  | -1.157791 |
| H                     | 1.712035  | -0.412416 | 1.631305  | H                     | 1.142590  | -1.034474 | 0.049220  |
| H                     | 0.126650  | -1.233475 | 1.513667  | H                     | 3.852922  | 1.184485  | 3.939382  |
| H                     | 2.815684  | 2.487853  | 3.325687  | H                     | 4.586350  | 2.696096  | 3.379681  |
| H                     | 3.700551  | 5.738716  | 1.427374  | H                     | 4.355948  | 4.084589  | 1.477758  |
| H                     | 3.378727  | 4.700051  | 2.829718  | Br                    | -1.224269 | -2.501490 | -1.305028 |
| B                     | -2.258978 | -3.447257 | -0.026767 | Br                    | -2.979096 | -5.154882 | -0.437276 |
| Br                    | -2.577634 | -2.676450 | 1.689417  |                       |           |           |           |

### Me<sub>2</sub>-Br-DBB[BBr<sub>3</sub>]

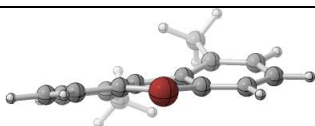

#p m062x/def2svp opt freq empiricaldispersion=gd3  
nosymm

Charge = 0, Multiplicity = 1, Point group = C1

Electronic Energy = -16402.477168 Hartree

Number of imaginary frequencies = 0

Sum of electronic and zero-point Energies = -16402.170240 Hartree

Sum of electronic and thermal Energies = -16402.139160 Hartree

Sum of electronic and thermal Enthalpies = -16402.138215 Hartree

Sum of electronic and thermal Free Energies = -16402.242818 Hartree

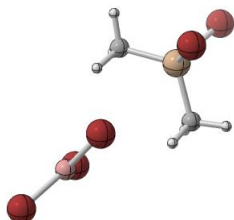

| Cartesian Coordinates |           |           |           | Cartesian Coordinates |           |           |           |
|-----------------------|-----------|-----------|-----------|-----------------------|-----------|-----------|-----------|
| Atoms                 | X         | Y         | Z         | Atoms                 | X         | Y         | Z         |
| C                     | 2.997623  | 2.353610  | 0.936085  | C                     | 3.270337  | 1.764045  | -0.331788 |
| C                     | 3.959644  | 0.566061  | -0.442999 | C                     | 4.374330  | -0.088099 | 0.723544  |
| C                     | 4.007729  | 0.430028  | 1.958462  | C                     | 3.277927  | 1.630558  | 2.103383  |
| C                     | 2.278909  | 3.662822  | 0.736908  | C                     | 2.099891  | 4.750398  | 1.599382  |
| C                     | 1.266612  | 5.795791  | 1.149558  | C                     | 0.701852  | 5.819238  | -0.119189 |
| C                     | 1.031028  | 4.811856  | -1.032175 | C                     | 1.824807  | 3.756867  | -0.608763 |
| B                     | 2.522920  | 2.617909  | -1.396188 | Br                    | 2.585420  | 2.395056  | -3.294317 |
| C                     | 2.734537  | 1.959999  | 3.471402  | C                     | 2.820821  | 4.937789  | 2.910992  |
| H                     | 4.154762  | 0.138146  | -1.429129 | H                     | 4.931698  | -1.024262 | 0.669236  |
| H                     | 4.254190  | -0.130779 | 2.863855  | H                     | 1.088206  | 6.635743  | 1.826173  |
| H                     | 0.059424  | 6.650064  | -0.413921 | H                     | 0.684823  | 4.853813  | -2.067496 |
| H                     | 3.446010  | 2.519773  | 4.094782  | H                     | 2.501326  | 1.025383  | 4.000960  |
| H                     | 1.807741  | 2.541163  | 3.392689  | H                     | 2.206572  | 4.661933  | 3.780026  |
| H                     | 3.093241  | 5.996143  | 3.025299  | H                     | 3.744524  | 4.347992  | 2.941671  |
| Si                    | -0.851310 | 0.536937  | 0.630529  | C                     | -2.575828 | -0.143549 | 0.787848  |
| C                     | 0.529469  | -0.544513 | 1.240791  | Br                    | -0.800781 | 2.478076  | 1.752168  |
| Br                    | -0.471661 | 0.999957  | -1.531688 | H                     | -3.302318 | 0.601660  | 0.435801  |
| H                     | -2.790547 | -0.377228 | 1.841210  | H                     | -2.681769 | -1.059079 | 0.188413  |
| H                     | 1.496468  | -0.066993 | 1.026161  | H                     | 0.494758  | -1.518350 | 0.731594  |
| H                     | 0.438596  | -0.701834 | 2.326135  | Br                    | -0.934087 | -2.778844 | -1.626527 |
| B                     | -1.286694 | -4.189378 | -0.402859 | Br                    | -1.360270 | -5.987461 | -1.001723 |
| Br                    | -1.564849 | -3.788116 | 1.439068  |                       |           |           |           |

**TS-1\*\*[BBr<sub>3</sub>]**

#p m062x/def2svp opt=(calcfc,ts,noeigen)  
freq empiricaldispersion=gd3 nosymm

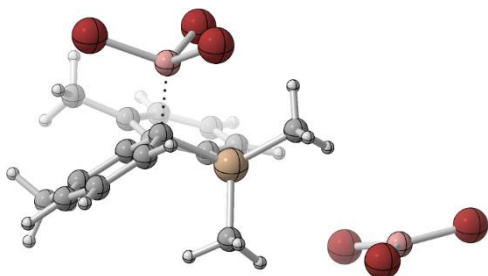

Charge = 0, Multiplicity = 1, Point group = C1

Electronic Energy = -16402.428683 Hartree

Number of imaginary frequencies = 1,  $\nu_i = -7.70 \text{ cm}^{-1}$

Sum of electronic and zero-point Energies = -16402.122493 Hartree

Sum of electronic and thermal Energies = -16402.093070 Hartree

Sum of electronic and thermal Enthalpies = -16402.092125 Hartree

Sum of electronic and thermal Free Energies = -16402.187824 Hartree

| Cartesian Coordinates |           |           |           | Cartesian Coordinates |           |           |           |
|-----------------------|-----------|-----------|-----------|-----------------------|-----------|-----------|-----------|
| Atoms                 | X         | Y         | Z         | Atoms                 | X         | Y         | Z         |
| C                     | 0.017981  | 2.565111  | -1.763866 | C                     | 0.234476  | 1.169047  | -1.745988 |
| C                     | 1.121054  | 0.593220  | -2.652832 | C                     | 1.786852  | 1.408382  | -3.568095 |
| C                     | 1.621714  | 2.791827  | -3.525620 | C                     | 0.757031  | 3.406560  | -2.613226 |
| C                     | -0.958232 | 2.988367  | -0.734091 | C                     | -0.834088 | 2.283481  | 0.531377  |
| Si                    | -0.583520 | 0.443524  | -0.221684 | C                     | -2.057965 | 3.820633  | -1.000766 |
| C                     | -3.050580 | 3.917751  | -0.016861 | C                     | -3.016221 | 3.200404  | 1.183331  |
| C                     | -1.933305 | 2.390157  | 1.444064  | C                     | -2.338448 | -0.159347 | -0.499220 |
| C                     | 0.460222  | -0.776695 | 0.720469  | C                     | 0.767806  | 4.906151  | -2.468083 |
| C                     | -2.279397 | 4.522099  | -2.315036 | H                     | 1.321673  | -0.480240 | -2.633807 |
| H                     | 2.480498  | 0.969972  | -4.287402 | H                     | 2.218275  | 3.423209  | -4.188302 |
| H                     | -3.917721 | 4.550493  | -0.226131 | H                     | -3.833321 | 3.290168  | 1.898925  |
| H                     | -1.870974 | 1.853854  | 2.392727  | H                     | -2.805093 | -0.437892 | 0.457953  |
| H                     | -2.352764 | -1.041134 | -1.155780 | H                     | -2.941982 | 0.633910  | -0.965186 |
| H                     | 0.641795  | -1.637523 | 0.055918  | H                     | 1.425130  | -0.335435 | 1.000901  |
| H                     | -0.048094 | -1.132341 | 1.627192  | H                     | 1.807471  | 5.261851  | -2.469935 |
| H                     | 0.317369  | 5.221514  | -1.517458 | H                     | 0.244634  | 5.405722  | -3.297023 |
| H                     | -3.352403 | 4.567484  | -2.543600 | H                     | -1.769616 | 4.004309  | -3.136925 |
| H                     | -1.902931 | 5.554521  | -2.282225 | Br                    | 0.657648  | 1.668916  | 3.170054  |
| B                     | 0.625879  | 2.716856  | 1.439306  | Br                    | 0.416358  | 4.698578  | 1.804193  |
| Br                    | 2.345528  | 2.401721  | 0.454393  | Br                    | -0.486035 | -2.857641 | -2.625762 |
| B                     | -0.564707 | -4.117984 | -1.195660 | Br                    | 0.591012  | -5.619234 | -1.195611 |
| Br                    | -1.798126 | -3.852506 | 0.224392  |                       |           |           |           |

**TS-2\*\*[BBr<sub>3</sub>]**

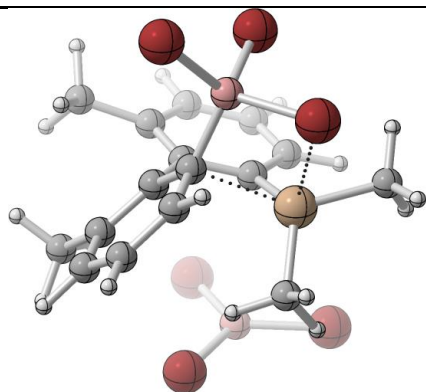

#p m062x/def2svp opt=(calcfc,ts,noeigen) freq  
empiricaldispersion=gd3 nosymm

Charge = 0, Multiplicity = 1, Point group = C1

Electronic Energy = -16402.420245 Hartree

Number of imaginary frequencies = 1,  $\nu_i = -139.49 \text{ cm}^{-1}$

Sum of electronic and zero-point Energies = -16402.114020 Hartree

Sum of electronic and thermal Energies = -16402.084550 Hartree

Sum of electronic and thermal Enthalpies = -16402.083605 Hartree

Sum of electronic and thermal Free Energies = -16402.177675 Hartree

| Cartesian Coordinates |           |           |           | Cartesian Coordinates |           |           |           |
|-----------------------|-----------|-----------|-----------|-----------------------|-----------|-----------|-----------|
| Atoms                 | X         | Y         | Z         | Atoms                 | X         | Y         | Z         |
| C                     | 0.611971  | -1.481407 | -0.388292 | C                     | 0.274632  | -2.376723 | 0.644192  |
| C                     | 0.972180  | -3.583357 | 0.779076  | C                     | 1.978090  | -3.897164 | -0.127513 |
| C                     | 2.321107  | -2.988574 | -1.129638 | C                     | 1.660200  | -1.765842 | -1.279321 |
| C                     | -0.188242 | -0.234494 | -0.347860 | C                     | -0.302920 | 0.413043  | 0.921184  |
| Si                    | -0.839617 | -1.691243 | 1.980747  | C                     | -1.013618 | 0.126327  | -1.437778 |
| C                     | -1.995090 | 1.096675  | -1.228991 | C                     | -2.175943 | 1.706994  | 0.014794  |
| C                     | -1.343923 | 1.371046  | 1.064054  | C                     | -2.668511 | -1.416415 | 1.778452  |
| C                     | -0.470617 | -2.645114 | 3.539573  | Br                    | -0.029034 | 0.519130  | 3.890438  |
| B                     | 0.921459  | 0.689540  | 2.020447  | Br                    | 1.553442  | 2.585314  | 1.777151  |
| Br                    | 2.519872  | -0.525289 | 2.043444  | C                     | 2.161841  | -0.763670 | -2.285120 |
| C                     | -0.919576 | -0.528906 | -2.792341 | H                     | 0.745834  | -4.272146 | 1.595239  |
| H                     | 2.522129  | -4.838522 | -0.038329 | H                     | 3.156967  | -3.216601 | -1.795617 |
| H                     | -2.659558 | 1.354959  | -2.057397 | H                     | -2.961402 | 2.451135  | 0.151010  |
| H                     | -1.455711 | 1.883568  | 2.020639  | H                     | -3.005989 | -0.767591 | 2.600336  |
| H                     | -3.182267 | -2.388082 | 1.860287  | H                     | -2.918965 | -0.945547 | 0.820710  |
| H                     | -0.721865 | -3.700244 | 3.328558  | H                     | 0.594076  | -2.572395 | 3.798825  |
| H                     | -1.076549 | -2.292425 | 4.382538  | H                     | 1.897260  | -1.056162 | -3.312363 |
| H                     | 3.257256  | -0.698662 | -2.229990 | H                     | 1.756960  | 0.238155  | -2.092312 |
| H                     | -1.897495 | -0.517423 | -3.291344 | H                     | -0.581043 | -1.571973 | -2.724890 |
| H                     | -0.212292 | 0.012422  | -3.438160 | Br                    | -3.295976 | -2.763066 | -1.473720 |
| B                     | -2.089684 | -4.175147 | -1.061049 | Br                    | -0.742782 | -4.661597 | -2.299418 |
| Br                    | -2.301431 | -5.140760 | 0.572810  |                       |           |           |           |

TS-3\*\*[BBr<sub>3</sub>]

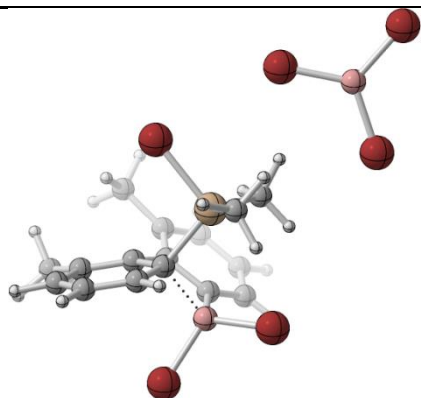

#p m062x/def2svp opt=(calcfc,ts,noeigen) freq  
empiricaldispersion=gd3 nosymm

Charge = 0, Multiplicity = 1, Point group = C1

Electronic Energy = -16402.456159 Hartree

Number of imaginary frequencies = 1,  $\nu_i = -32.01 \text{ cm}^{-1}$

Sum of electronic and zero-point Energies = -16402.149572 Hartree

Sum of electronic and thermal Energies = -16402.119835 Hartree

Sum of electronic and thermal Enthalpies = -16402.118891 Hartree

Sum of electronic and thermal Free Energies = -16402.217289 Hartree

| Cartesian Coordinates |           |           |           | Cartesian Coordinates |           |           |           |
|-----------------------|-----------|-----------|-----------|-----------------------|-----------|-----------|-----------|
| Atoms                 | X         | Y         | Z         | Atoms                 | X         | Y         | Z         |
| C                     | 1.808646  | -0.171558 | 0.053442  | C                     | 1.893499  | -0.789730 | -1.212052 |
| C                     | 2.770533  | -1.853828 | -1.403070 | C                     | 3.543807  | -2.292984 | -0.328043 |
| C                     | 3.411535  | -1.705372 | 0.932200  | C                     | 2.537011  | -0.635634 | 1.160725  |
| C                     | 0.793744  | 0.899397  | -0.017766 | C                     | 0.971198  | 2.229369  | 0.394650  |
| C                     | 0.033536  | 3.166108  | -0.051814 | C                     | -1.044829 | 2.843790  | -0.888745 |
| C                     | -1.213482 | 1.538032  | -1.291948 | C                     | -0.307786 | 0.521555  | -0.868747 |
| Si                    | -1.277114 | -1.047183 | -0.269249 | C                     | -2.909690 | -1.172481 | -1.165159 |
| C                     | -0.346081 | -2.650763 | -0.098745 | Br                    | -1.795829 | -0.450082 | 1.872152  |
| B                     | 0.861665  | -0.136039 | -2.229008 | Br                    | 1.568652  | 1.472304  | -3.189250 |
| Br                    | -0.083011 | -1.375141 | -3.487186 | C                     | 2.330845  | -0.107732 | 2.557000  |
| C                     | 2.177959  | 2.695279  | 1.163142  | H                     | 2.833421  | -2.345586 | -2.376099 |
| H                     | 4.238060  | -3.124861 | -0.459258 | H                     | 3.981126  | -2.107249 | 1.773433  |
| H                     | 0.183532  | 4.213050  | 0.225496  | H                     | -1.722350 | 3.627413  | -1.227722 |
| H                     | -2.039900 | 1.271793  | -1.955394 | H                     | -3.550096 | -0.311835 | -0.928364 |
| H                     | -3.422528 | -2.084557 | -0.827118 | H                     | -2.758772 | -1.237465 | -2.251756 |
| H                     | 0.540747  | -2.540044 | 0.539919  | H                     | -0.043232 | -3.039292 | -1.080031 |
| H                     | -1.036833 | -3.362924 | 0.377663  | H                     | 2.342805  | -0.935943 | 3.278787  |
| H                     | 1.364210  | 0.405583  | 2.650275  | H                     | 3.127046  | 0.593495  | 2.848519  |
| H                     | 2.008001  | 2.651284  | 2.248548  | H                     | 2.415924  | 3.734897  | 0.903565  |
| H                     | 3.051365  | 2.071482  | 0.931745  | Br                    | -3.110092 | -5.128994 | -1.245235 |
| B                     | -3.858219 | -5.237182 | 0.501512  | Br                    | -4.753050 | -6.815830 | 1.058058  |
| Br                    | -3.697794 | -3.755966 | 1.682680  |                       |           |           |           |



TS-4\*\*[BBr<sub>3</sub>]

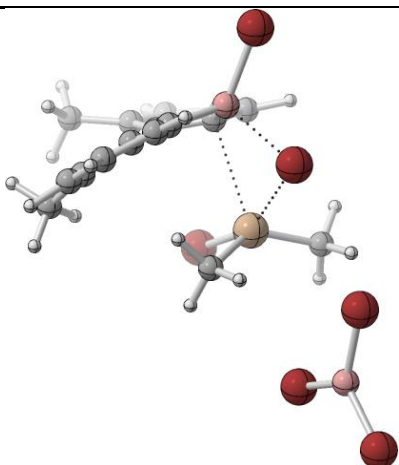

#p m062x/def2svp opt=(calcfc,ts,noeigen) freq  
empiricaldispersion=gd3 nosymm

Charge = 0, Multiplicity = 1, Point group = C1

Electronic Energy = -16402.424420 Hartree

Number of imaginary frequencies = 1,  $\nu_i = -141.69 \text{ cm}^{-1}$

Sum of electronic and zero-point Energies = -16402.117672 Hartree

Sum of electronic and thermal Energies = -16402.087876 Hartree

Sum of electronic and thermal Enthalpies = -16402.086932 Hartree

Sum of electronic and thermal Free Energies = -16402.185563 Hartree

| Cartesian Coordinates |           |           |           | Cartesian Coordinates |           |           |           |
|-----------------------|-----------|-----------|-----------|-----------------------|-----------|-----------|-----------|
| Atoms                 | X         | Y         | Z         | Atoms                 | X         | Y         | Z         |
| C                     | 3.170782  | 1.683910  | 0.517734  | C                     | 3.280947  | 1.094399  | -0.768681 |
| C                     | 4.211517  | 0.092444  | -1.009291 | C                     | 5.004891  | -0.370455 | 0.043344  |
| C                     | 4.805115  | 0.123929  | 1.329573  | C                     | 3.871612  | 1.136152  | 1.608680  |
| C                     | 2.112343  | 2.739036  | 0.499728  | C                     | 1.905982  | 3.850755  | 1.329025  |
| C                     | 0.755516  | 4.626544  | 1.091886  | C                     | -0.125418 | 4.384319  | 0.040425  |
| C                     | 0.179051  | 3.382552  | -0.878989 | C                     | 1.296863  | 2.571658  | -0.658951 |
| B                     | 2.121580  | 1.669254  | -1.688315 | Br                    | 2.604347  | 2.504695  | -3.422153 |
| C                     | 3.570621  | 1.453303  | 3.052817  | C                     | 2.884934  | 4.329555  | 2.369591  |
| H                     | 4.296730  | -0.345953 | -2.006462 | H                     | 5.742212  | -1.157333 | -0.124710 |
| H                     | 5.362535  | -0.311563 | 2.162534  | H                     | 0.567188  | 5.476912  | 1.752708  |
| H                     | -1.001506 | 5.020222  | -0.092771 | H                     | -0.409550 | 3.256567  | -1.792586 |
| H                     | 3.691290  | 0.543918  | 3.657610  | H                     | 2.536330  | 1.802651  | 3.170716  |
| H                     | 4.241262  | 2.215665  | 3.473819  | H                     | 2.921862  | 5.427559  | 2.355890  |
| H                     | 3.893821  | 3.953104  | 2.162582  | H                     | 2.603920  | 4.021888  | 3.387007  |
| Si                    | -0.249755 | 0.385797  | 0.219749  | C                     | -1.976230 | 0.293646  | -0.479058 |
| C                     | 0.857132  | -0.975915 | 0.842742  | Br                    | -0.620804 | 1.588885  | 2.111182  |
| H                     | -2.168617 | 1.227290  | -1.028136 | H                     | -2.704284 | 0.205981  | 0.337573  |
| H                     | -2.063456 | -0.548003 | -1.179104 | H                     | 1.903727  | -0.634091 | 0.798281  |
| H                     | 0.755444  | -1.853420 | 0.189754  | H                     | 0.598869  | -1.217796 | 1.881866  |
| Br                    | 0.702670  | 0.049187  | -2.150306 | Br                    | -1.076687 | -3.326085 | -1.623941 |
| B                     | -1.980733 | -3.956562 | -0.072926 | Br                    | -2.643443 | -5.730344 | -0.008244 |
| Br                    | -2.215861 | -2.799089 | 1.422670  |                       |           |           |           |

### 3. Results of IRC Analysis of Transition States

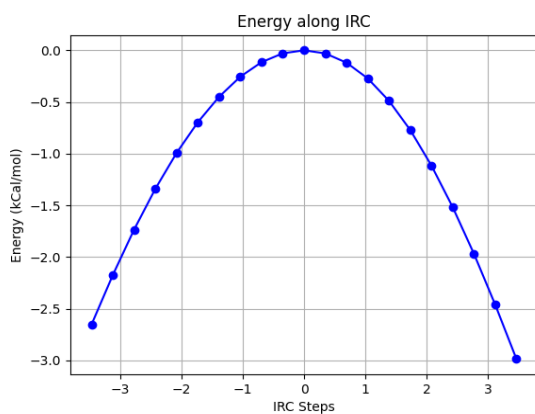

(A)

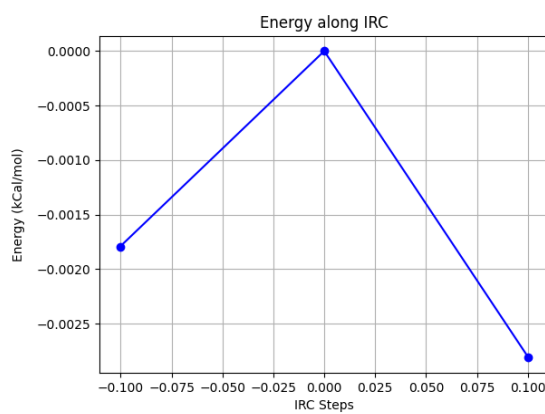

(B)

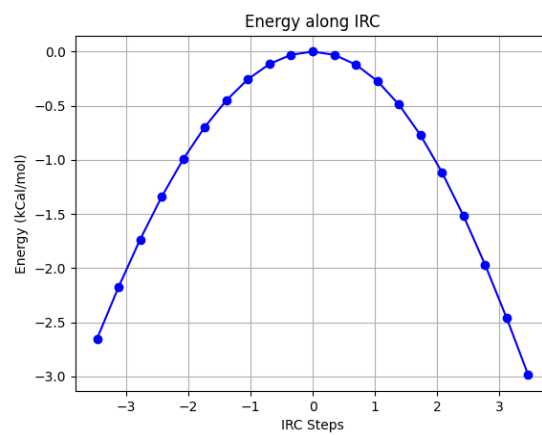

(C)

**Figure S-1:** IRC scan profiles for (A) TS-2\*\*, (B) TS-3\*\*, and (C) TS-4\*\*.

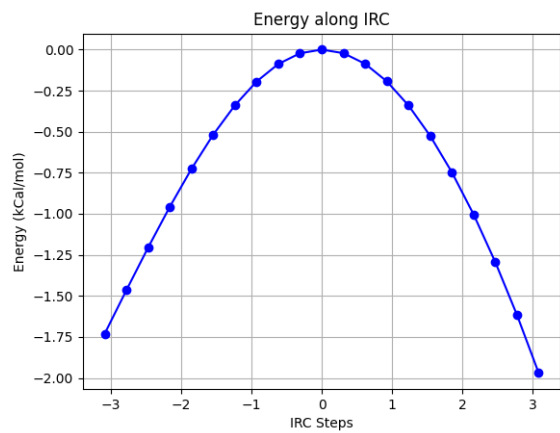

(A)

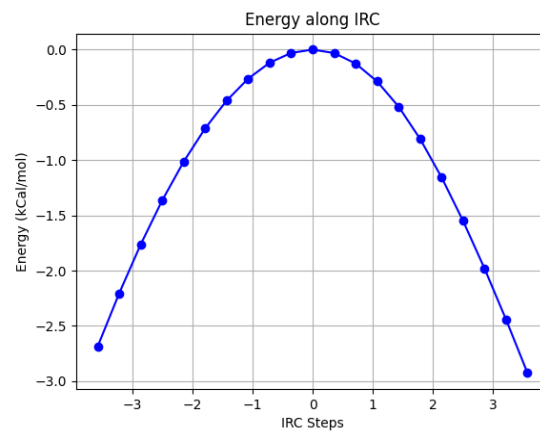

(B)

**Figure S-2:** IRC scan profiles for (A) **TS-2\*\*[BBr<sub>3</sub>]** and (B) **TS-4\*\*[BBr<sub>3</sub>]**

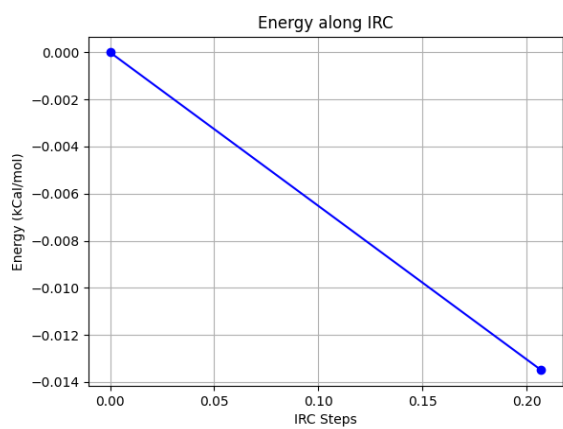

(A)

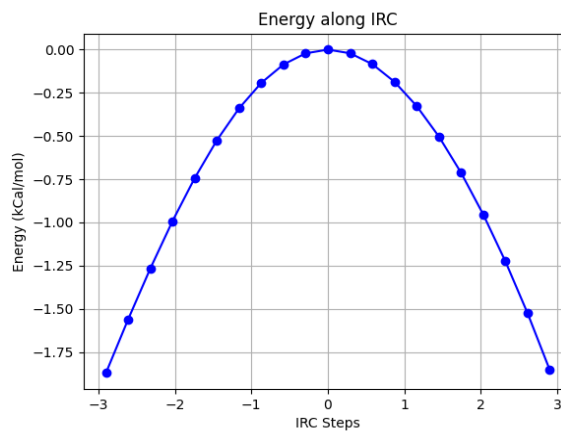

(B)

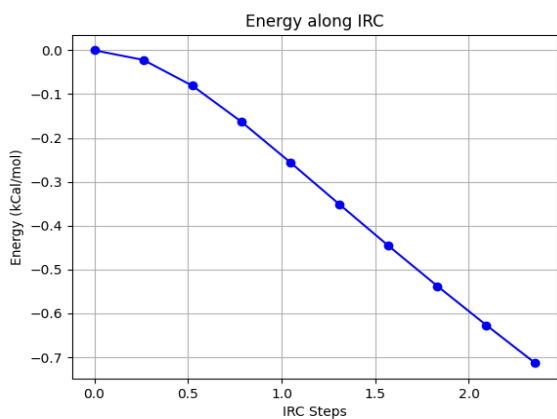

(C)

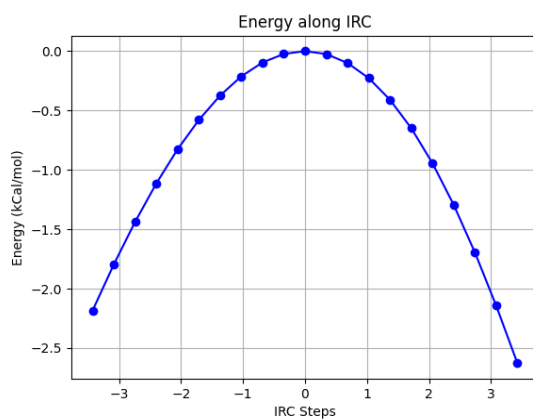

(D)

**Figure S-3: IRC scan profiles for (A) TS-1, (B) TS-2, (D) TS-3 , and (D) TS-4.**

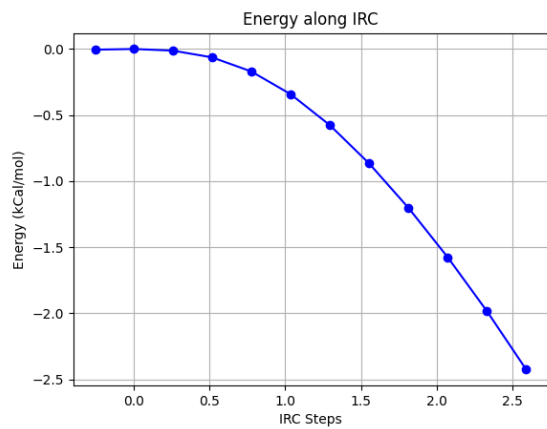

(A)

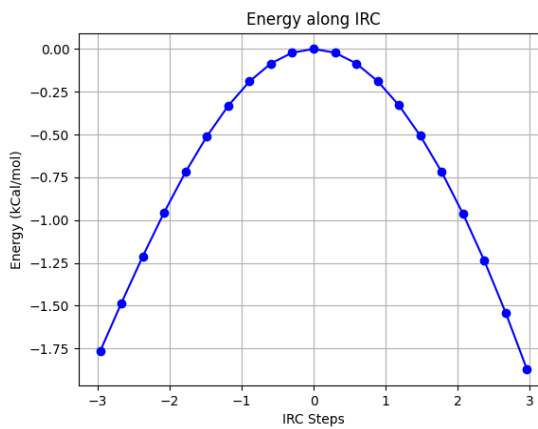

(B)

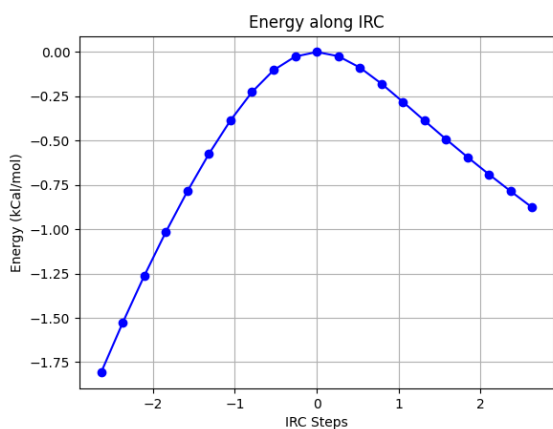

(C)

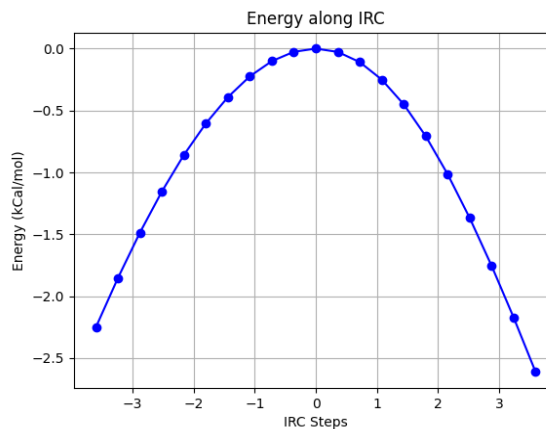

(D)

**Figure S-4:** IRC scan profiles for (A) **TS-1**[BBr<sub>3</sub>], (B) **TS-2**[BBr<sub>3</sub>], (C) **TS-3**[BBr<sub>3</sub>], and (D) **TS-4**[BBr<sub>3</sub>].

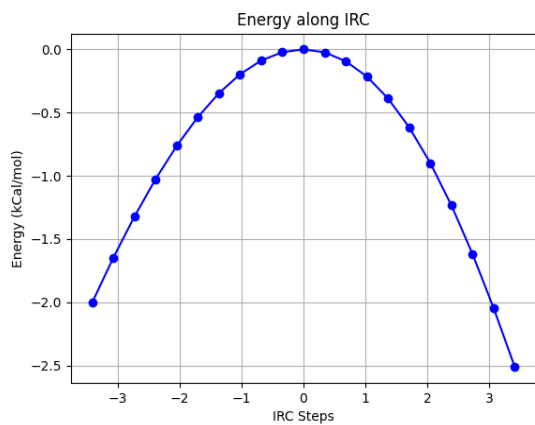

(A)

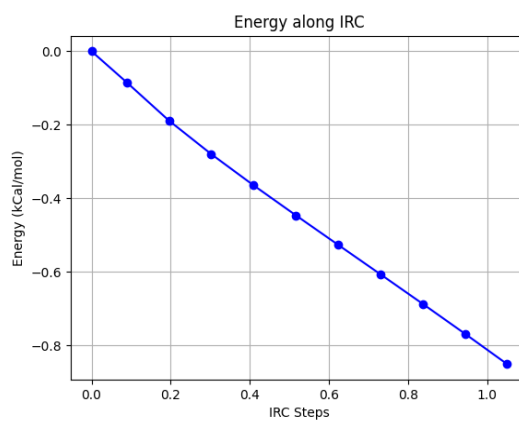

(B)

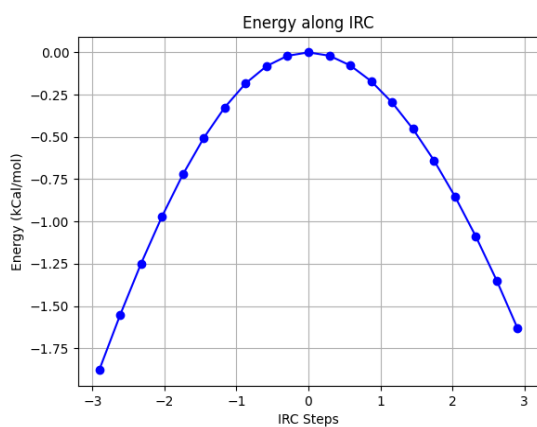

(C)

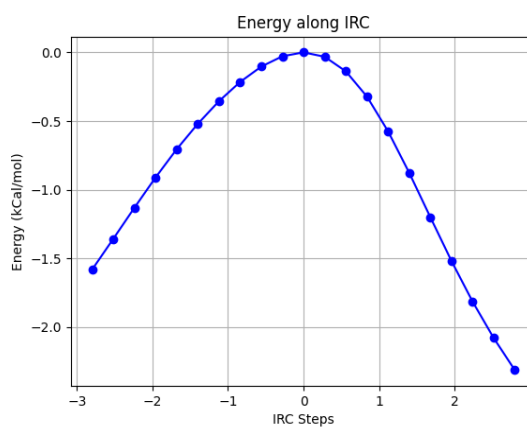

(D)

**Figure S-5: IRC scan profiles for (A) TS-1\*, (B) TS-2\*, (C) TS-3\*, and (D) TS-4\*.**

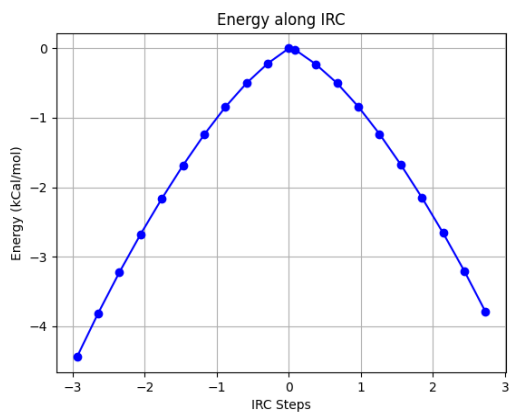

(A)

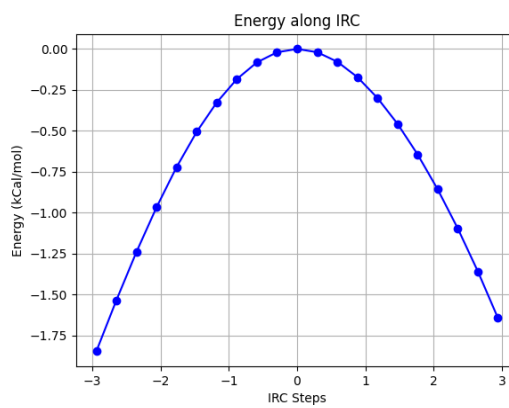

(B)

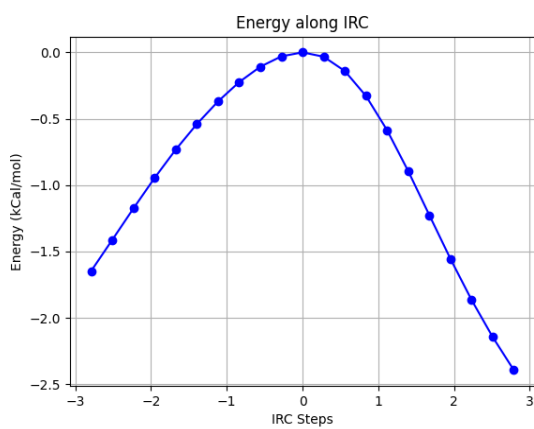

(C)

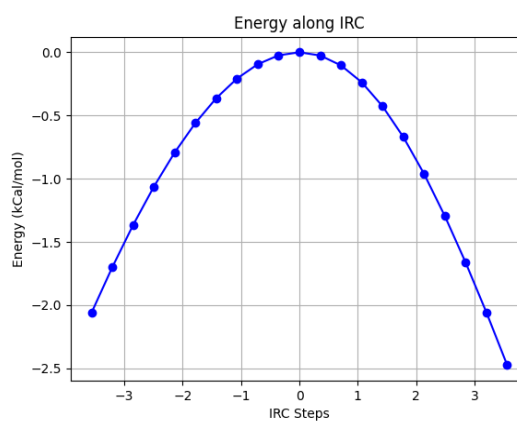

(D)

**Figure S-6:** IRC scan profiles for (A) **TS-1\***[BBr<sub>3</sub>], (B) **TS-2\***[BBr<sub>3</sub>], (C) **TS-3\***[BBr<sub>3</sub>], and (D) **TS-4\***[BBr<sub>3</sub>].

#### 4. Rotational Potential Energy Surfaces of IM-2 and IM-2\*\*

Relaxed scans were performed on **IM-2** and **IM-2\*\*** using the method implemented in *Gaussian 16* program at the M06-2X-GD3/Def2-SVP level of theory to obtain the correlation between total energy and the dihedral angle ( $\theta$ ) of the biphenyl unit.

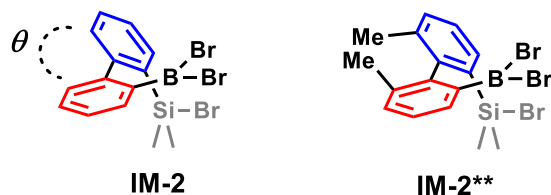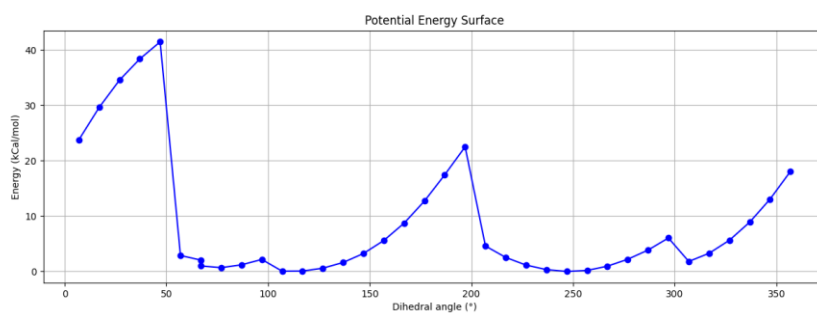

(A)

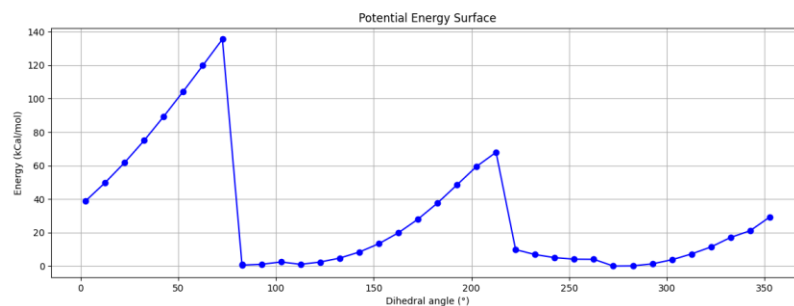

(B)

**Figure S-7:** Results of relax scans showing the energy profiles of (A) **IM-2** and (B) **IM-2\*\*** in relation to the biphenyl dihedral angle.



## 5. Results of NMR Analysis

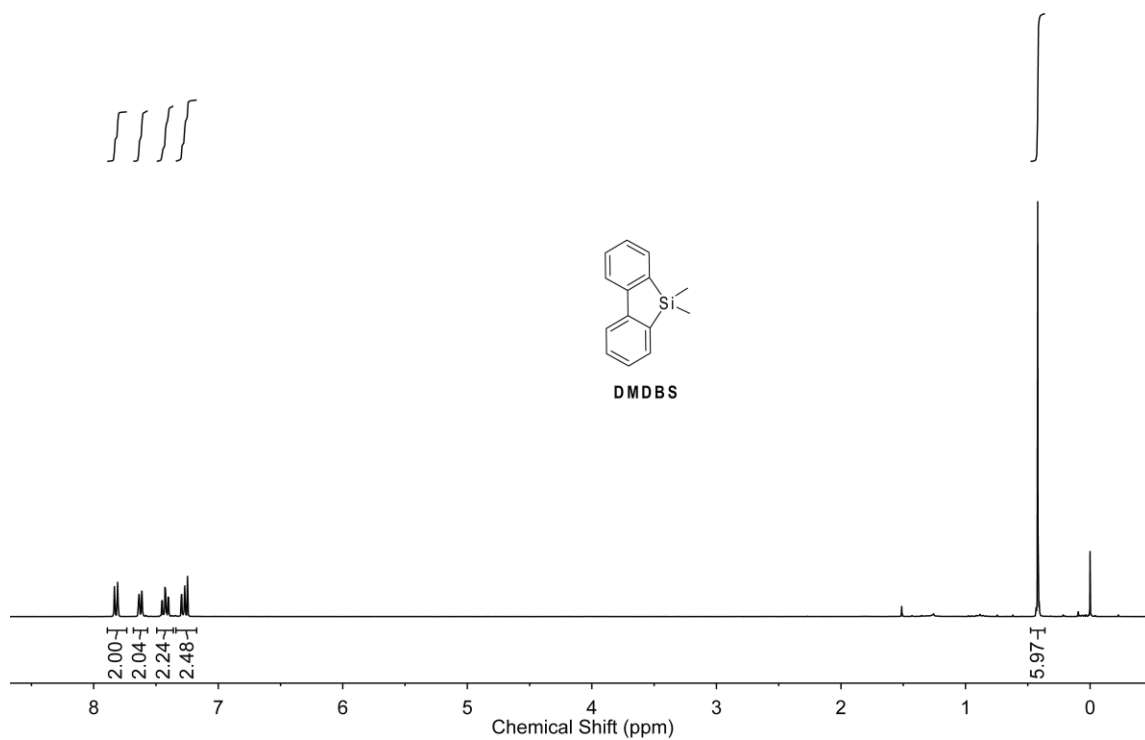

**Figure S-8:** <sup>1</sup>H NMR (300 MHz, CDCl<sub>3</sub>) spectrum of **DMDBS**.

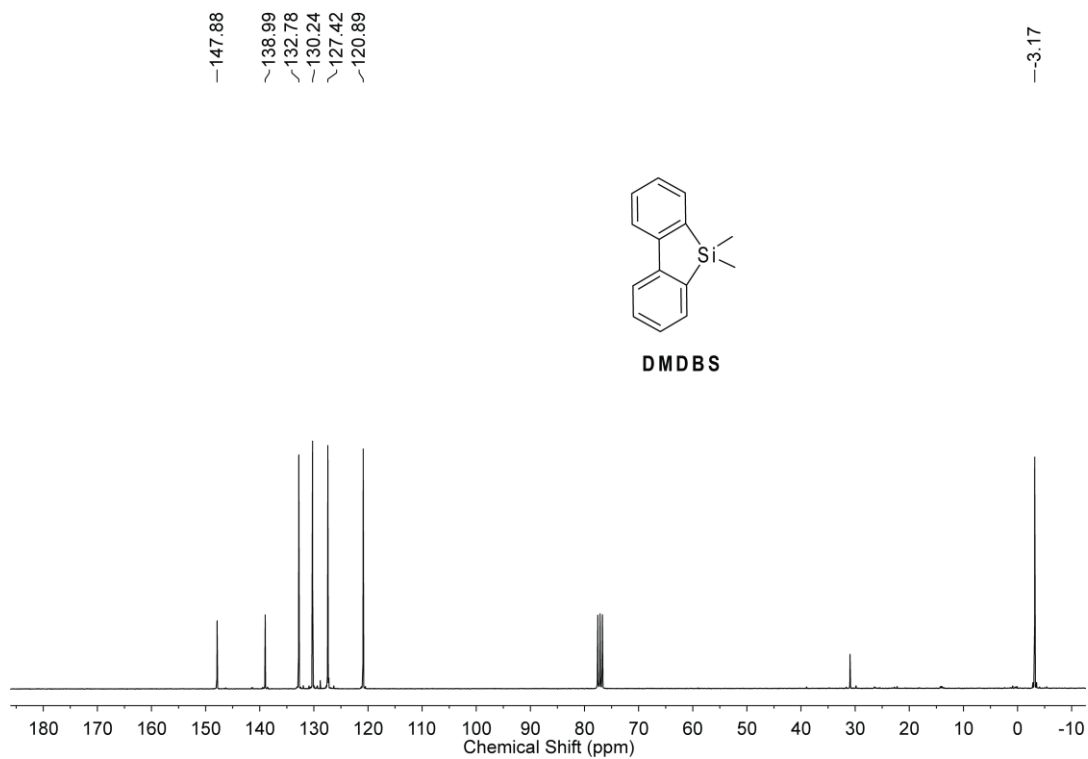

**Figure S-9:** <sup>13</sup>C NMR (75 MHz, CDCl<sub>3</sub>) spectrum of **DMDBS**.

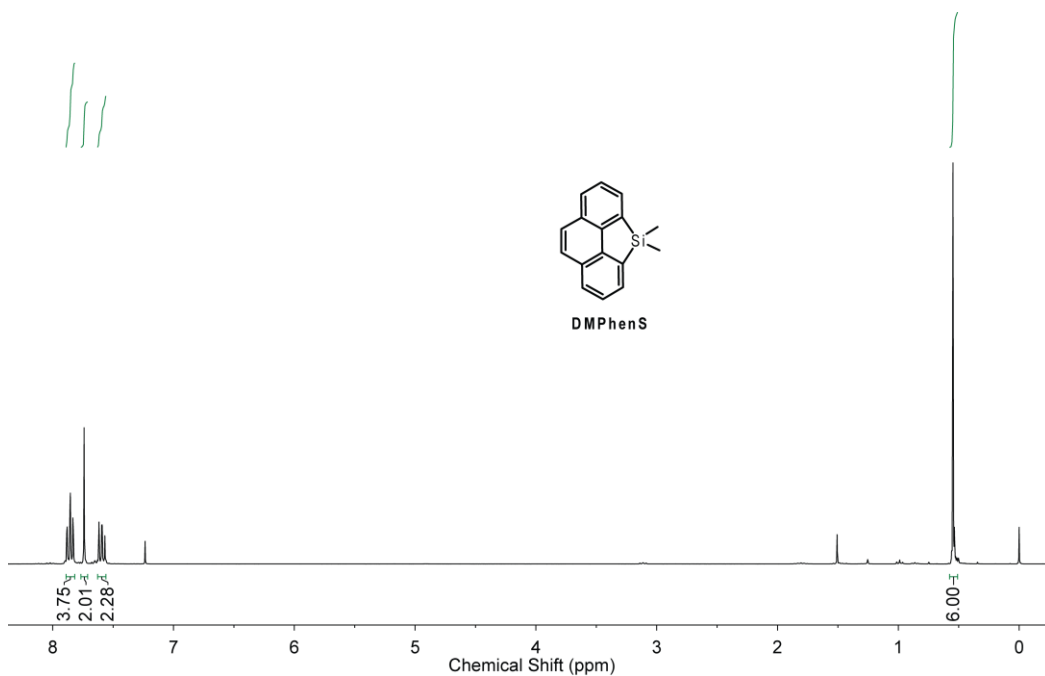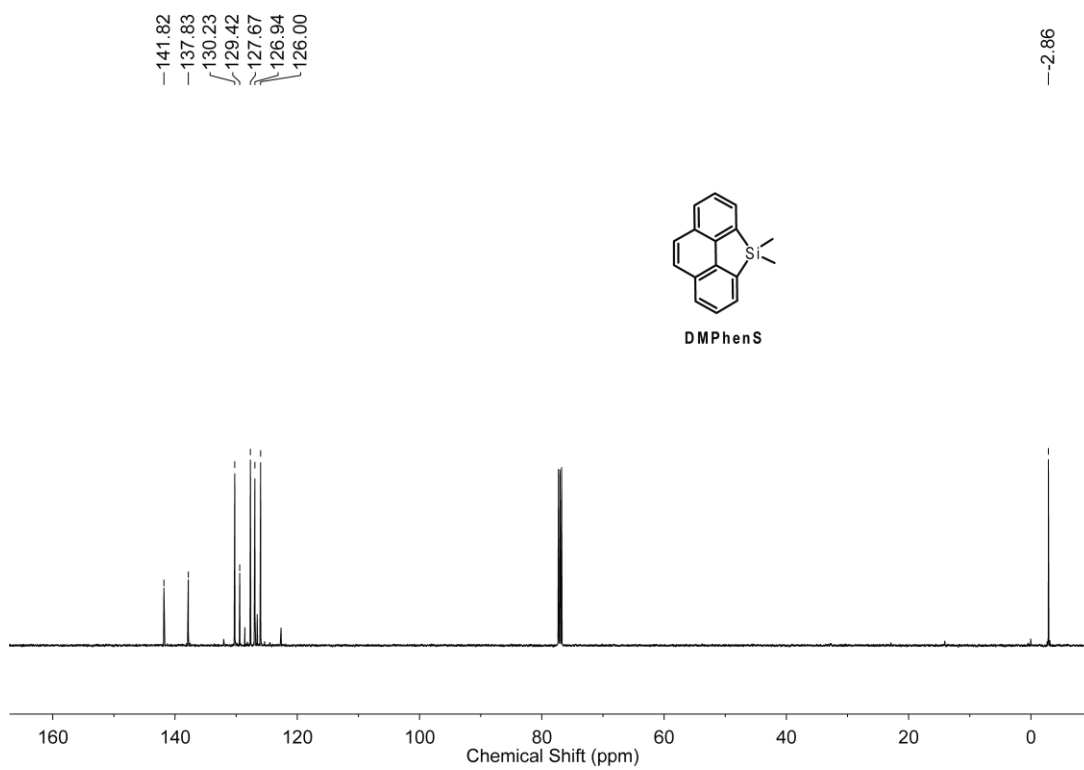

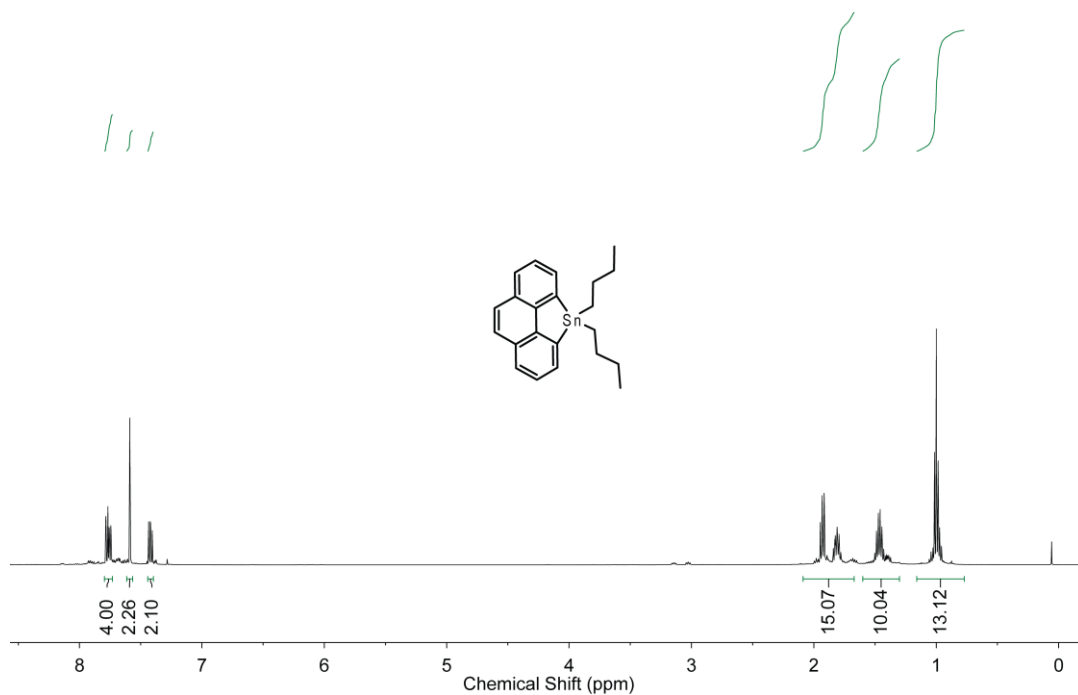

**Figure S-12:**  $^1\text{H}$  NMR (500 MHz,  $\text{CDCl}_3$ ) spectrum of 4,4-dibutyl-4H-phenanthro[4,5-bcd]stannole.

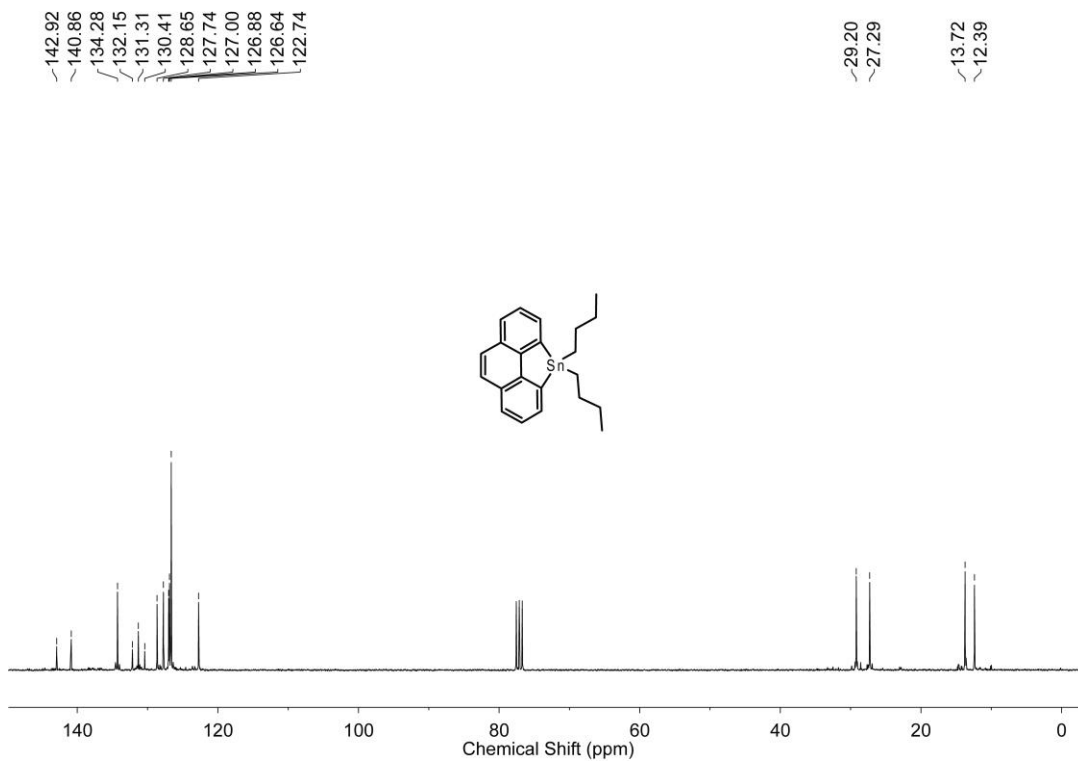

**Figure S-13:**  $^{13}\text{C}$  NMR (125 MHz,  $\text{CDCl}_3$ ) spectrum of 4,4-dibutyl-4H-phenanthro[4,5-bcd]stannole.

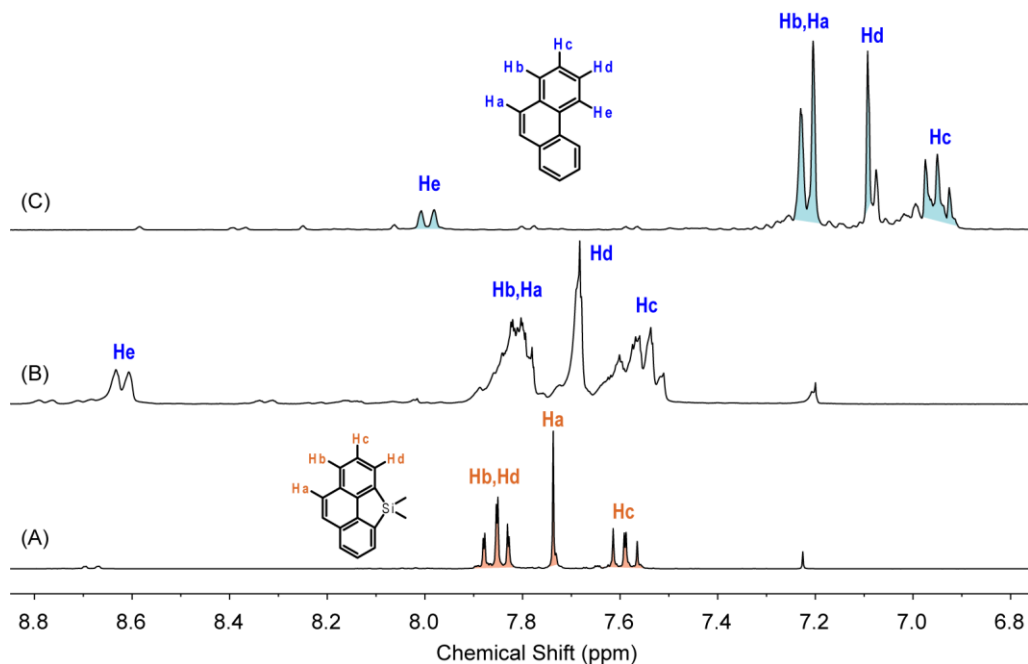

**Figure S-14:** <sup>1</sup>H NMR (500 MHz) spectra of (A) pure **DMPheoS** in CDCl<sub>3</sub>, (B) **DMPheoS** reacted with excess BBr<sub>3</sub> in CDCl<sub>3</sub> at 50 °C for 12 hours, and (C) **DMPheoS** reacted with excess BBr<sub>3</sub> (neat) at 50 °C for 12 hours.

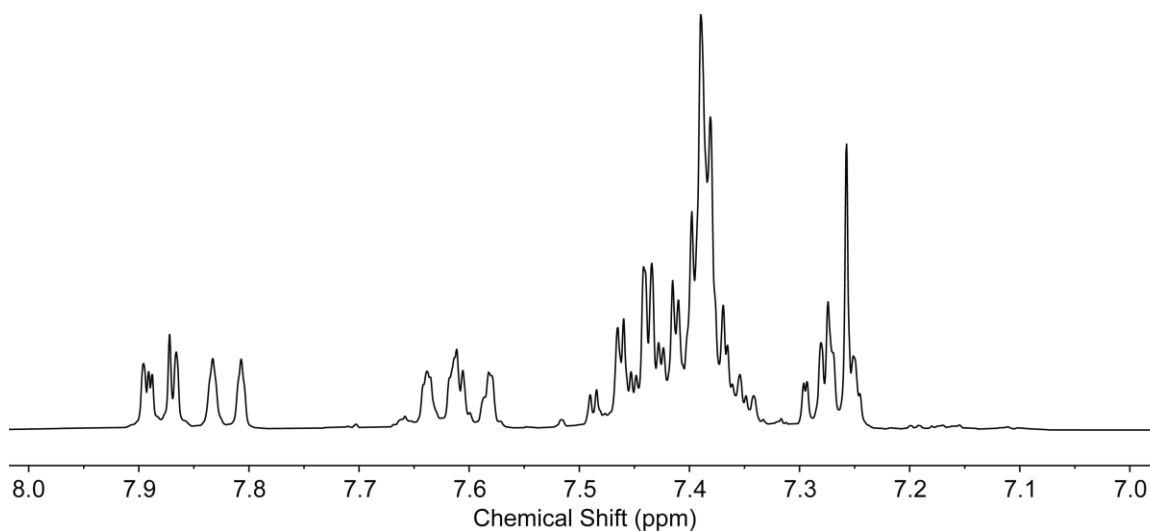

**Figure S-15:** <sup>1</sup>H NMR (300 MHz, CDCl<sub>3</sub>) spectrum measured after the 1:1 (mole ratio) mixture of **DMDBS** and BBr<sub>3</sub> was heated at 50 °C for 48 hours.

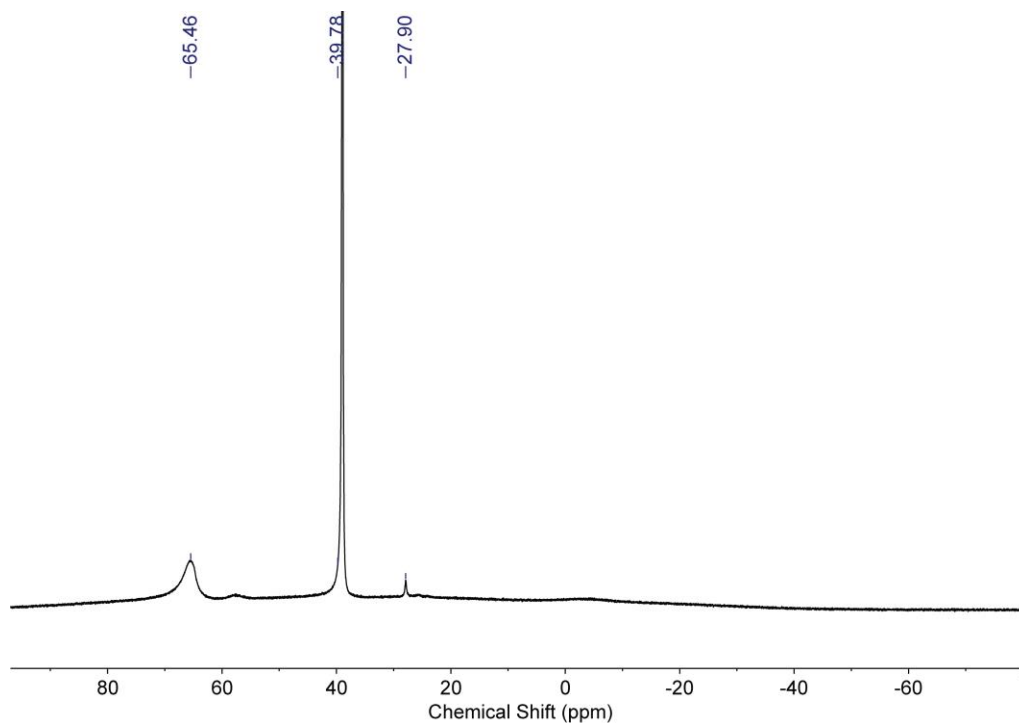

**Figure S-16:**  $^{11}\text{B}$  NMR (160 MHz,  $\text{CDCl}_3$ ) of the reaction mixture after mixing 4,4-dibutyl-4*H*-phenanthro[4,5-*bcd*]stannole with  $\text{BBr}_3$  at room temperature for 20 min. The signal at 65.46 ppm is due to **Br-PhenB**. The signal at 39.78 ppm is due to  $\text{BBr}_3$  and the small peak at 27.90 ppm is likely due to a boronic / boronate byproduct(s).

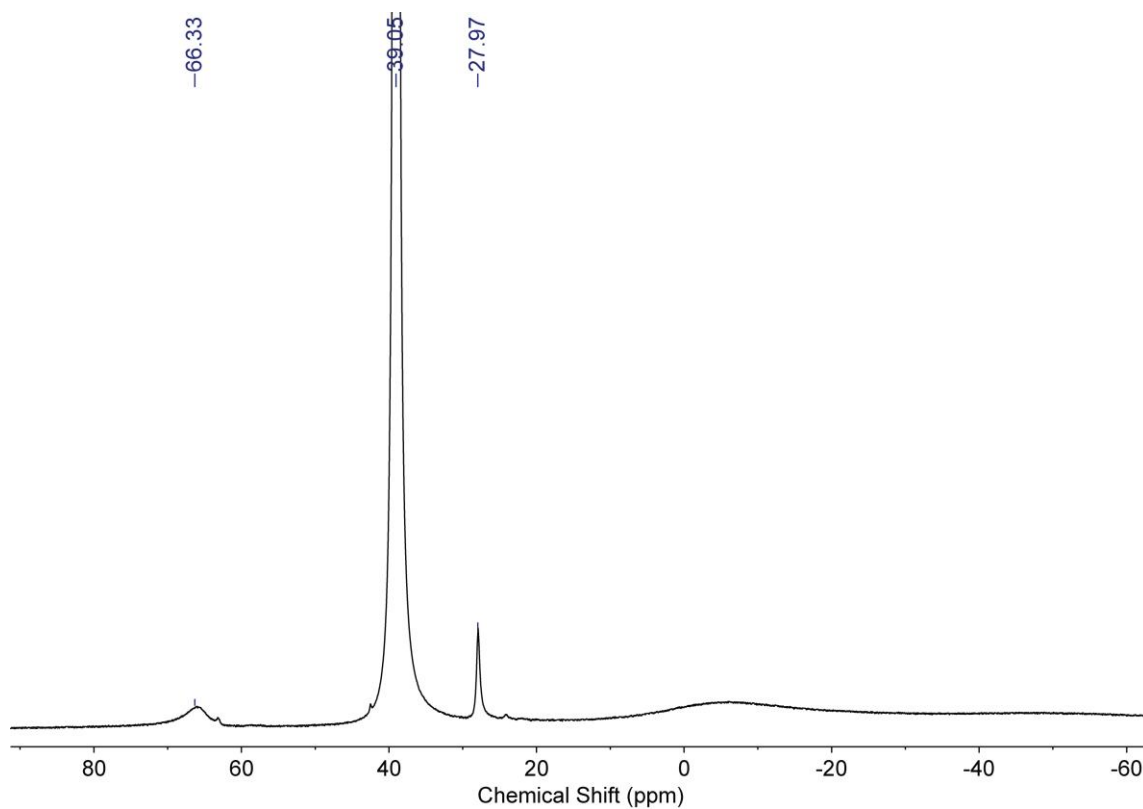

**Figure S-17:**  $^{11}\text{B}$  NMR (96 MHz,  $\text{CDCl}_3$ ) of the reaction mixture after mixing **DMDBS** with  $\text{BBr}_3$  (1: 50 mole ratio) at 50 °C for 48 h. The signal at 66.33 ppm is due to **Br-DBB**. The signal at 39.05 ppm is due to excess  $\text{BBr}_3$  and the peak at 27.97 ppm is likely due to a boronic / boronate byproduct(s).
